# Supplementary material for: Enhancing a de novo enzyme activity by computationally-focused ultra-low-throughput screening
Source: PubMed Central journal article supplement (PMC7407621; doi:10.1039/d0sc01935f), 2020-05-19
Supplement: SC-011-D0SC01935F-s002.pdf [file SC-011-D0SC01935F-s002.pdf]

SupplementaryData

| serial_number           | 48A | 50A | 250A | 256A | 260A | 261A | 285A | 286A | 287A | 290A | 291A | total_score |
|-------------------------|-----|-----|------|------|------|------|------|------|------|------|------|-------------|
| '01010101010101010101   | V   | D   | I    | R    | L    | V    | L    | V    | V    | W    | H    | -906.616    |
| '0101010202020101040104 | V   | D   | I    | H    | F    | I    | L    | V    | L    | W    | I    | -917.026    |
| '0101040102030101010106 | V   | D   | V    | R    | F    | L    | L    | V    | V    | W    | L    | -916.926    |
| '0101010202020101010101 | V   | D   | I    | H    | F    | I    | L    | V    | V    | W    | H    | -916.868    |
| '0101030102020101040104 | V   | D   | M    | R    | F    | I    | L    | V    | L    | W    | I    | -916.714    |
| '0101010202030101010104 | V   | D   | I    | H    | F    | L    | L    | V    | V    | W    | I    | -916.472    |
| '0101040102020103010104 | V   | D   | V    | R    | F    | I    | L    | I    | V    | W    | I    | -916.394    |
| '0101030202030101010105 | V   | D   | M    | H    | F    | L    | L    | V    | V    | W    | K    | -916.082    |
| '0101010102020101010105 | V   | D   | I    | R    | F    | I    | L    | V    | V    | W    | K    | -916.056    |
| '0101030202020101020101 | V   | D   | M    | H    | F    | I    | L    | V    | A    | W    | H    | -915.92     |
| '0101010102030101040104 | V   | D   | I    | R    | F    | L    | L    | V    | L    | W    | I    | -915.728    |
| '0101040202030101070101 | V   | D   | V    | H    | F    | L    | L    | V    | T    | W    | H    | -915.696    |
| '0101040202030101010112 | V   | D   | V    | H    | F    | L    | L    | V    | V    | W    | V    | -915.629    |
| '0101030102030101010101 | V   | D   | M    | R    | F    | L    | L    | V    | V    | W    | H    | -915.391    |
| '0101010102030101020109 | V   | D   | I    | R    | F    | L    | L    | V    | A    | W    | Q    | -915.354    |
| '0201010102030103010104 | I   | D   | I    | R    | F    | L    | L    | I    | V    | W    | I    | -915.214    |
| '0101040105030101040108 | V   | D   | V    | R    | V    | L    | L    | V    | L    | W    | N    | -915.183    |
| '0101030205020101010104 | V   | D   | M    | H    | V    | I    | L    | V    | V    | W    | I    | -915.135    |
| '0101040103020103010106 | V   | D   | V    | R    | I    | I    | L    | I    | V    | W    | L    | -915.116    |
| '0101040202020103010101 | V   | D   | V    | H    | F    | I    | L    | I    | V    | W    | H    | -915.115    |
| '0101010203020101070108 | V   | D   | I    | H    | I    | I    | L    | V    | T    | W    | N    | -915.018    |
| '0101010202030101070110 | V   | D   | I    | H    | F    | L    | L    | V    | T    | W    | R    | -914.945    |
| '0101040103030101040112 | V   | D   | V    | R    | I    | L    | L    | V    | L    | W    | V    | -914.942    |
| '0201010103020101010106 | I   | D   | I    | R    | I    | I    | L    | V    | V    | W    | L    | -914.936    |
| '0201040103030101010104 | I   | D   | V    | R    | I    | L    | L    | V    | V    | W    | I    | -914.906    |
| '0101030105020103010105 | V   | D   | M    | R    | V    | I    | L    | I    | V    | W    | K    | -914.852    |
| '0101010202030101040105 | V   | D   | I    | H    | F    | L    | L    | V    | L    | W    | K    | -914.823    |
| '0101040102030101050105 | V   | D   | V    | R    | F    | L    | L    | V    | M    | W    | K    | -914.8      |
| '0101010202020101070112 | V   | D   | I    | H    | F    | I    | L    | V    | T    | W    | V    | -914.796    |
| '0101010403020101040106 | V   | D   | I    | Q    | I    | I    | L    | V    | L    | W    | L    | -914.775    |
| '0101010102010103010108 | V   | D   | I    | R    | F    | V    | L    | I    | V    | W    | N    | -914.763    |
| '0101010103020101040112 | V   | D   | I    | R    | I    | I    | L    | V    | L    | W    | V    | -914.76     |
| '0101040102020103070101 | V   | D   | V    | R    | F    | I    | L    | I    | T    | W    | H    | -914.715    |
| '0101040102010103040101 | V   | D   | V    | R    | F    | V    | L    | I    | L    | W    | H    | -914.689    |
| '0101010102020101020112 | V   | D   | I    | R    | F    | I    | L    | V    | A    | W    | V    | -914.683    |

|                         |   |   |   |   |   |   |   |   |   |   |   |          |
|-------------------------|---|---|---|---|---|---|---|---|---|---|---|----------|
| '0101030102020101020105 | V | D | M | R | F | I | L | V | A | W | K | -914.627 |
| '0101010102020103030105 | V | D | I | R | F | I | L | I | I | W | K | -914.601 |
| '0101030102030101070106 | V | D | M | R | F | L | L | V | T | W | L | -914.582 |
| '0101010402020103010105 | V | D | I | Q | F | I | L | I | V | W | K | -914.579 |
| '0101030102010103040104 | V | D | M | R | F | V | L | I | L | W | I | -914.498 |
| '0101010202030103010109 | V | D | I | H | F | L | L | I | V | W | Q | -914.462 |
| '0101030201020101010105 | V | D | M | H | L | I | L | V | V | W | K | -914.441 |
| '0101030103020101010112 | V | D | M | R | I | I | L | V | V | W | V | -914.42  |
| '0101030202030101050101 | V | D | M | H | F | L | L | V | M | W | H | -914.41  |
| '0101010102020103020111 | V | D | I | R | F | I | L | I | A | W | T | -914.408 |
| '0101030102020103010112 | V | D | M | R | F | I | L | I | V | W | V | -914.4   |
| '0101040102010103010110 | V | D | V | R | F | V | L | I | V | W | R | -914.375 |
| '0101040203010103010101 | V | D | V | H | I | V | L | I | V | W | H | -914.352 |
| '0101010302040101040104 | V | D | I | K | F | M | L | V | L | W | I | -914.346 |
| '0101010102030101030110 | V | D | I | R | F | L | L | V | I | W | R | -914.339 |
| '0101010205020101020101 | V | D | I | H | V | I | L | V | A | W | H | -914.319 |
| '0101040102030101040107 | V | D | V | R | F | L | L | V | L | W | M | -914.272 |
| '0101030203030101010104 | V | D | M | H | I | L | L | V | V | W | I | -914.261 |
| '0101030102020101070109 | V | D | M | R | F | I | L | V | T | W | Q | -914.25  |
| '0101010105020103030106 | V | D | I | R | V | I | L | I | I | W | L | -914.227 |
| '0101020102020101010106 | V | D | L | R | F | I | L | V | V | W | L | -914.186 |
| '0101030103020101040109 | V | D | M | R | I | I | L | V | L | W | Q | -914.16  |
| '0101010302030101020101 | V | D | I | K | F | L | L | V | A | W | H | -914.149 |
| '0101040105030101020104 | V | D | V | R | V | L | L | V | A | W | I | -914.108 |
| '0101010102020103040101 | V | D | I | R | F | I | L | I | L | W | H | -914.103 |
| '0101010105020103040102 | V | D | I | R | V | I | L | I | L | W | E | -914.094 |
| '0101010302030103010105 | V | D | I | K | F | L | L | I | V | W | K | -914.061 |
| '0101040105020103010101 | V | D | V | R | V | I | L | I | V | W | H | -914.01  |
| '0101030105020101070106 | V | D | M | R | V | I | L | V | T | W | L | -913.984 |
| '0101030105020101010108 | V | D | M | R | V | I | L | V | V | W | N | -913.93  |
| '0101010102040101070101 | V | D | I | R | F | M | L | V | T | W | H | -913.897 |
| '0101040103030101020108 | V | D | V | R | I | L | L | V | A | W | N | -913.896 |
| '0101030105010103040106 | V | D | M | R | V | V | L | I | L | W | L | -913.879 |
| '0101040102010104040104 | V | D | V | R | F | V | L | L | L | W | I | -913.879 |
| '0101040102030201010108 | V | D | V | R | F | L | A | V | V | W | N | -913.87  |
| '0101030102030101040110 | V | D | M | R | F | L | L | V | L | W | R | -913.858 |
| '0101040105010103040108 | V | D | V | R | V | V | L | I | L | W | N | -913.849 |

|                         |   |   |   |   |   |   |   |   |   |   |   |          |
|-------------------------|---|---|---|---|---|---|---|---|---|---|---|----------|
| '0101040102030103010105 | V | D | V | R | F | L | L | I | V | W | K | -913.841 |
| '0101030102020101050106 | V | D | M | R | F | I | L | V | M | W | L | -913.836 |
| '0101010102030103030104 | V | D | I | R | F | L | L | I | I | W | I | -913.823 |
| '0101040102010101040106 | V | D | V | R | F | V | L | V | L | W | L | -913.812 |
| '0201040105030101010109 | I | D | V | R | V | L | L | V | V | W | Q | -913.799 |
| '0101030302020101010106 | V | D | M | K | F | I | L | V | V | W | L | -913.773 |
| '0101040105020101010106 | V | D | V | R | V | I | L | V | V | W | L | -913.77  |
| '0101030205020101040101 | V | D | M | H | V | I | L | V | L | W | H | -913.764 |
| '0101010102030103020106 | V | D | I | R | F | L | L | I | A | W | L | -913.757 |
| '0101010102030101050101 | V | D | I | R | F | L | L | V | M | W | H | -913.75  |
| '0201010105010103040106 | I | D | I | R | V | V | L | I | L | W | L | -913.698 |
| '0101030402020101070101 | V | D | M | Q | F | I | L | V | T | W | H | -913.677 |
| '0101010102020101040111 | V | D | I | R | F | I | L | V | L | W | T | -913.665 |
| '0101040402030101040101 | V | D | V | Q | F | L | L | V | L | W | H | -913.649 |
| '0201010103020101070104 | I | D | I | R | I | I | L | V | T | W | I | -913.634 |
| '0101010203020101030110 | V | D | I | H | I | I | L | V | I | W | R | -913.618 |
| '0101010202040101010108 | V | D | I | H | F | M | L | V | V | W | N | -913.604 |
| '0101040103010103040109 | V | D | V | R | I | V | L | I | L | W | Q | -913.595 |
| '0101010105020101030110 | V | D | I | R | V | I | L | V | I | W | R | -913.592 |
| '0101010202030101030108 | V | D | I | H | F | L | L | V | I | W | N | -913.581 |
| '0101040203030101020101 | V | D | V | H | I | L | L | V | A | W | H | -913.554 |
| '0101040103010103030105 | V | D | V | R | I | V | L | I | I | W | K | -913.542 |
| '0101030103020101030104 | V | D | M | R | I | I | L | V | I | W | I | -913.527 |
| '0101040103030101030104 | V | D | V | R | I | L | L | V | I | W | I | -913.521 |
| '0101030105030101040104 | V | D | M | R | V | L | L | V | L | W | I | -913.518 |
| '0101010302020103010108 | V | D | I | K | F | I | L | I | V | W | N | -913.516 |
| '0101010102010103030102 | V | D | I | R | F | V | L | I | I | W | E | -913.507 |
| '0101040103020101040105 | V | D | V | R | I | I | L | V | L | W | K | -913.484 |
| '0101010203030101020112 | V | D | I | H | I | L | L | V | A | W | V | -913.481 |
| '0201010105030101010106 | I | D | I | R | V | L | L | V | V | W | L | -913.465 |
| '0201040103030101020101 | I | D | V | R | I | L | L | V | A | W | H | -913.444 |
| '0101030102030103010110 | V | D | M | R | F | L | L | I | V | W | R | -913.44  |
| '0101010105020101020106 | V | D | I | R | V | I | L | V | A | W | L | -913.425 |
| '0101030103010103010110 | V | D | M | R | I | V | L | I | V | W | R | -913.417 |
| '0101010102020101030107 | V | D | I | R | F | I | L | V | I | W | M | -913.413 |
| '0101030105010103030104 | V | D | M | R | V | V | L | I | I | W | I | -913.403 |
| '0101040102010103030104 | V | D | V | R | F | V | L | I | I | W | I | -913.396 |

|                         |   |   |   |   |   |   |   |   |   |   |   |          |
|-------------------------|---|---|---|---|---|---|---|---|---|---|---|----------|
| '0101010102030201040106 | V | D | I | R | F | L | A | V | L | W | L | -913.365 |
| '0101030102010103010106 | V | D | M | R | F | V | L | I | V | W | L | -913.359 |
| '0101010202040101040106 | V | D | I | H | F | M | L | V | L | W | L | -913.351 |
| '0201010202030101010112 | I | D | I | H | F | L | L | V | V | W | V | -913.334 |
| '0101030105010103020105 | V | D | M | R | V | V | L | I | A | W | K | -913.33  |
| '0101020102030101040106 | V | D | L | R | F | L | L | V | L | W | L | -913.322 |
| '0101020202020101010104 | V | D | L | H | F | I | L | V | V | W | I | -913.319 |
| '0101030202010103010112 | V | D | M | H | F | V | L | I | V | W | V | -913.3   |
| '0101010402030103010104 | V | D | I | Q | F | L | L | I | V | W | I | -913.294 |
| '0101010205040101040104 | V | D | I | H | V | M | L | V | L | W | I | -913.271 |
| '0101010202020101020108 | V | D | I | H | F | I | L | V | A | W | N | -913.242 |
| '0101010105020101050101 | V | D | I | R | V | I | L | V | M | W | H | -913.24  |
| '0201010102030101040107 | I | D | I | R | F | L | L | V | L | W | M | -913.239 |
| '0101010105020103050112 | V | D | I | R | V | I | L | I | M | W | V | -913.236 |
| '0201010102020101040105 | I | D | I | R | F | I | L | V | L | W | K | -913.228 |
| '0201010105030101020105 | I | D | I | R | V | L | L | V | A | W | K | -913.225 |
| '0101040105020101070104 | V | D | V | R | V | I | L | V | T | W | I | -913.218 |
| '0101030102040101040106 | V | D | M | R | F | M | L | V | L | W | L | -913.213 |
| '0101040203030101010106 | V | D | V | H | I | L | L | V | V | W | L | -913.2   |
| '0101010102010103040106 | V | D | I | R | F | V | L | I | L | W | L | -913.198 |
| '0101030205030101070101 | V | D | M | H | V | L | L | V | T | W | H | -913.168 |
| '0101010402020101070111 | V | D | I | Q | F | I | L | V | T | W | T | -913.167 |
| '0101040103030103040101 | V | D | V | R | I | L | L | I | L | W | H | -913.166 |
| '0101040203020101010104 | V | D | V | H | I | I | L | V | V | W | I | -913.165 |
| '0101020102030101010109 | V | D | L | R | F | L | L | V | V | W | Q | -913.15  |
| '0101040105020101040110 | V | D | V | R | V | I | L | V | L | W | R | -913.146 |
| '0201010102030101010111 | I | D | I | R | F | L | L | V | V | W | T | -913.085 |
| '0101010402030101040112 | V | D | I | Q | F | L | L | V | L | W | V | -913.069 |
| '0301040105020101010101 | L | D | V | R | V | I | L | V | V | W | H | -913.054 |
| '0101040102020101010102 | V | D | V | R | F | I | L | V | V | W | E | -913.051 |
| '0101010103020103040109 | V | D | I | R | I | I | L | I | L | W | Q | -913.022 |
| '0101040105010103030110 | V | D | V | R | V | V | L | I | I | W | R | -913.01  |
| '0101040105030101070107 | V | D | V | R | V | L | L | V | T | W | M | -912.997 |
| '0101030105020101040105 | V | D | M | R | V | I | L | V | L | W | K | -912.992 |
| '0101010405020101040107 | V | D | I | Q | V | I | L | V | L | W | M | -912.985 |
| '0101010105010103030109 | V | D | I | R | V | V | L | I | I | W | Q | -912.983 |
| '0101010402020101040101 | V | D | I | Q | F | I | L | V | L | W | H | -912.928 |

|                         |   |   |   |   |   |   |   |   |   |   |   |          |
|-------------------------|---|---|---|---|---|---|---|---|---|---|---|----------|
| '0101020105020101040101 | V | D | L | R | V | I | L | V | L | W | H | -912.923 |
| '0101030402010101040104 | V | D | M | Q | F | V | L | V | L | W | I | -912.92  |
| '0101010202010103030106 | V | D | I | H | F | V | L | I | I | W | L | -912.918 |
| '0101010305010103040104 | V | D | I | K | V | V | L | I | L | W | I | -912.914 |
| '0201040105030103010101 | I | D | V | R | V | L | L | I | V | W | H | -912.911 |
| '0101010205020201040101 | V | D | I | H | V | I | A | V | L | W | H | -912.872 |
| '0101040105020104010104 | V | D | V | R | V | I | L | L | V | W | I | -912.866 |
| '0101030103030101020105 | V | D | M | R | I | L | L | V | A | W | K | -912.86  |
| '0101010302020101060105 | V | D | I | K | F | I | L | V | S | W | K | -912.856 |
| '0101030205040101010106 | V | D | M | H | V | M | L | V | V | W | L | -912.851 |
| '0101030201030101010108 | V | D | M | H | L | L | L | V | V | W | N | -912.844 |
| '0201010102030101070104 | I | D | I | R | F | L | L | V | T | W | I | -912.802 |
| '0101040105010103070102 | V | D | V | R | V | V | L | I | T | W | E | -912.798 |
| '0101010103020101030108 | V | D | I | R | I | I | L | V | I | W | N | -912.796 |
| '0101010102030103040112 | V | D | I | R | F | L | L | I | L | W | V | -912.792 |
| '0101040205030101040101 | V | D | V | H | V | L | L | V | L | W | H | -912.786 |
| '0101040102010103050105 | V | D | V | R | F | V | L | I | M | W | K | -912.781 |
| '0101040105030101050106 | V | D | V | R | V | L | L | V | M | W | L | -912.775 |
| '0101020102010103010101 | V | D | L | R | F | V | L | I | V | W | H | -912.773 |
| '0101030402030101010108 | V | D | M | Q | F | L | L | V | V | W | N | -912.761 |
| '0201010105020101040101 | I | D | I | R | V | I | L | V | L | W | H | -912.755 |
| '0101030102020103050101 | V | D | M | R | F | I | L | I | M | W | H | -912.749 |
| '0101030102030101020111 | V | D | M | R | F | L | L | V | A | W | T | -912.748 |
| '0101030201020101040106 | V | D | M | H | L | I | L | V | L | W | L | -912.741 |
| '0101010105020103010109 | V | D | I | R | V | I | L | I | V | W | Q | -912.739 |
| '0101040102010101070105 | V | D | V | R | F | V | L | V | T | W | K | -912.693 |
| '0101030103020201010101 | V | D | M | R | I | I | A | V | V | W | H | -912.677 |
| '0101030201020101020108 | V | D | M | H | L | I | L | V | A | W | N | -912.667 |
| '0101030103020101070110 | V | D | M | R | I | I | L | V | T | W | R | -912.666 |
| '0101010105020104040104 | V | D | I | R | V | I | L | L | L | W | I | -912.662 |
| '0101030102010101040109 | V | D | M | R | F | V | L | V | L | W | Q | -912.658 |
| '0101010102030101010107 | V | D | I | R | F | L | L | V | V | W | M | -912.652 |
| '0201040102010103010104 | I | D | V | R | F | V | L | I | V | W | I | -912.649 |
| '0101010102020101060104 | V | D | I | R | F | I | L | V | S | W | I | -912.636 |
| '0101010102010203010102 | V | D | I | R | F | V | A | I | V | W | E | -912.636 |
| '0101030103030101040102 | V | D | M | R | I | L | L | V | L | W | E | -912.62  |
| '0101030103010103040108 | V | D | M | R | I | V | L | I | L | W | N | -912.617 |

|                         |   |   |   |   |   |   |   |   |   |   |   |          |
|-------------------------|---|---|---|---|---|---|---|---|---|---|---|----------|
| '0201010102020101070110 | I | D | I | R | F | I | L | V | T | W | R | -912.592 |
| '0101030202030201010101 | V | D | M | H | F | L | A | V | V | W | H | -912.569 |
| '0101010203020103010106 | V | D | I | H | I | I | L | I | V | W | L | -912.546 |
| '0101010402010103030110 | V | D | I | Q | F | V | L | I | I | W | R | -912.54  |
| '0101010303020101010103 | V | D | I | K | I | I | L | V | V | W | F | -912.538 |
| '0101010205020101070102 | V | D | I | H | V | I | L | V | T | W | E | -912.531 |
| '0101010102010101040112 | V | D | I | R | F | V | L | V | L | W | V | -912.526 |
| '0201010105030101040108 | I | D | I | R | V | L | L | V | L | W | N | -912.519 |
| '0101010103020101010110 | V | D | I | R | I | I | L | V | V | W | R | -912.513 |
| '0201010202020101020101 | I | D | I | H | F | I | L | V | A | W | H | -912.5   |
| '0101040302030103010101 | V | D | V | K | F | L | L | I | V | W | H | -912.497 |
| '0101040303030101010110 | V | D | V | K | I | L | L | V | V | W | R | -912.493 |
| '0201010205020101010104 | I | D | I | H | V | I | L | V | V | W | I | -912.483 |
| '0201010202010103010104 | I | D | I | H | F | V | L | I | V | W | I | -912.475 |
| '0101010405020101030109 | V | D | I | Q | V | I | L | V | I | W | Q | -912.459 |
| '0101030102010101020108 | V | D | M | R | F | V | L | V | A | W | N | -912.449 |
| '0101030205020103010101 | V | D | M | H | V | I | L | I | V | W | H | -912.449 |
| '0101010205020101030112 | V | D | I | H | V | I | L | V | I | W | V | -912.446 |
| '0101030105020101030102 | V | D | M | R | V | I | L | V | I | W | E | -912.434 |
| '0101030102010104040105 | V | D | M | R | F | V | L | L | L | W | K | -912.432 |
| '0101010203010103030110 | V | D | I | H | I | V | L | I | I | W | R | -912.432 |
| '0201010205030103010101 | I | D | I | H | V | L | L | I | V | W | H | -912.432 |
| '0101040102020101070110 | V | D | V | R | F | I | L | V | T | W | R | -912.423 |
| '0101030102010103070109 | V | D | M | R | F | V | L | I | T | W | Q | -912.408 |
| '0201030105020101010105 | I | D | M | R | V | I | L | V | V | W | K | -912.402 |
| '0201010102030102010110 | I | D | I | R | F | L | L | A | V | W | R | -912.381 |
| '0101040105010103060105 | V | D | V | R | V | V | L | I | S | W | K | -912.37  |
| '0101040302010101040104 | V | D | V | K | F | V | L | V | L | W | I | -912.365 |
| '0101010303020101040109 | V | D | I | K | I | I | L | V | L | W | Q | -912.365 |
| '0101010205010104010101 | V | D | I | H | V | V | L | L | V | W | H | -912.355 |
| '0101040105030201010104 | V | D | V | R | V | L | A | V | V | W | I | -912.348 |
| '0101030103030101010110 | V | D | M | R | I | L | L | V | V | W | R | -912.346 |
| '0301040102020101010112 | L | D | V | R | F | I | L | V | V | W | V | -912.342 |
| '0101040302020101010101 | V | D | V | K | F | I | L | V | V | W | H | -912.332 |
| '0101010402030103070101 | V | D | I | Q | F | L | L | I | T | W | H | -912.322 |
| '0101030305010103010104 | V | D | M | K | V | V | L | I | V | W | I | -912.32  |
| '0101030102040101010104 | V | D | M | R | F | M | L | V | V | W | I | -912.319 |

|                         |   |   |   |   |   |   |   |   |   |   |   |          |
|-------------------------|---|---|---|---|---|---|---|---|---|---|---|----------|
| '0101010103020101050103 | V | D | I | R | I | I | L | V | M | W | F | -912.295 |
| '0101020102020101040105 | V | D | L | R | F | I | L | V | L | W | K | -912.291 |
| '0101010202030103020101 | V | D | I | H | F | L | L | I | A | W | H | -912.282 |
| '0101040104010103040110 | V | D | V | R | M | V | L | I | L | W | R | -912.279 |
| '0201040105010101040104 | I | D | V | R | V | V | L | V | L | W | I | -912.269 |
| '0101030102030101030108 | V | D | M | R | F | L | L | V | I | W | N | -912.252 |
| '0101040103010104010108 | V | D | V | R | I | V | L | L | V | W | N | -912.25  |
| '0101010202030203010101 | V | D | I | H | F | L | A | I | V | W | H | -912.248 |
| '0101040102010201040104 | V | D | V | R | F | V | A | V | L | W | I | -912.246 |
| '0101040202010101040102 | V | D | V | H | F | V | L | V | L | W | E | -912.242 |
| '0101010105030103040101 | V | D | I | R | V | L | L | I | L | W | H | -912.234 |
| '0101030402010103010110 | V | D | M | Q | F | V | L | I | V | W | R | -912.232 |
| '0301040103020101010110 | L | D | V | R | I | I | L | V | V | W | R | -912.219 |
| '0101010102020401010106 | V | D | I | R | F | I | W | V | V | W | L | -912.214 |
| '0101040205010101040105 | V | D | V | H | V | V | L | V | L | W | K | -912.209 |
| '0101030202020101010109 | V | D | M | H | F | I | L | V | V | W | Q | -912.207 |
| '0101020102020101020108 | V | D | L | R | F | I | L | V | A | W | N | -912.203 |
| '0101040102020101030106 | V | D | V | R | F | I | L | V | I | W | L | -912.199 |
| '0101010105040101020111 | V | D | I | R | V | M | L | V | A | W | T | -912.197 |
| '0101030102030101050109 | V | D | M | R | F | L | L | V | M | W | Q | -912.191 |
| '0101040103030101050107 | V | D | V | R | I | L | L | V | M | W | M | -912.19  |
| '0101010102010104070108 | V | D | I | R | F | V | L | L | T | W | N | -912.17  |
| '0101010105020104010108 | V | D | I | R | V | I | L | L | V | W | N | -912.166 |
| '0101010205020103010111 | V | D | I | H | V | I | L | I | V | W | T | -912.162 |
| '0101010305020101020104 | V | D | I | K | V | I | L | V | A | W | I | -912.16  |
| '0101030202010101010106 | V | D | M | H | F | V | L | V | V | W | L | -912.16  |
| '0201010102020101020104 | I | D | I | R | F | I | L | V | A | W | I | -912.159 |
| '0201030102030102010101 | I | D | M | R | F | L | L | A | V | W | H | -912.152 |
| '0101040102020101020104 | V | D | V | R | F | I | L | V | A | W | I | -912.141 |
| '0101030102030101060112 | V | D | M | R | F | L | L | V | S | W | V | -912.136 |
| '0101040102020104010110 | V | D | V | R | F | I | L | L | V | W | R | -912.135 |
| '0101030205010101010101 | V | D | M | H | V | V | L | V | V | W | H | -912.134 |
| '0101030105040101010101 | V | D | M | R | V | M | L | V | V | W | H | -912.129 |
| '0201030102010101040106 | I | D | M | R | F | V | L | V | L | W | L | -912.093 |
| '0101010102020101070106 | V | D | I | R | F | I | L | V | T | W | L | -912.092 |
| '0101010203010103040104 | V | D | I | H | I | V | L | I | L | W | I | -912.091 |
| '0101040103020101010101 | V | D | V | R | I | I | L | V | V | W | H | -912.07  |

|                         |   |   |   |   |   |   |   |   |   |   |   |          |
|-------------------------|---|---|---|---|---|---|---|---|---|---|---|----------|
| '0101010102020102040106 | V | D | I | R | F | I | L | A | L | W | L | -912.066 |
| '0101010102030201070108 | V | D | I | R | F | L | A | V | T | W | N | -912.052 |
| '0201030102020101010101 | I | D | M | R | F | I | L | V | V | W | H | -912.049 |
| '0101010205030101040109 | V | D | I | H | V | L | L | V | L | W | Q | -912.049 |
| '0301010105020101040104 | L | D | I | R | V | I | L | V | L | W | I | -912.043 |
| '0101040303020103010101 | V | D | V | K | I | I | L | I | V | W | H | -912.043 |
| '0101030305020101070101 | V | D | M | K | V | I | L | V | T | W | H | -912.019 |
| '0101010103030101040111 | V | D | I | R | I | L | L | V | L | W | T | -912.018 |
| '0101040102020101060101 | V | D | V | R | F | I | L | V | S | W | H | -912.017 |
| '0101030203020101010111 | V | D | M | H | I | I | L | V | V | W | T | -911.99  |
| '0101010102030301010104 | V | D | I | R | F | L | V | V | V | W | I | -911.987 |
| '0101040302010103010104 | V | D | V | K | F | V | L | I | V | W | I | -911.986 |
| '0101040302030101010105 | V | D | V | K | F | L | L | V | V | W | K | -911.982 |
| '0101040205030101010104 | V | D | V | H | V | L | L | V | V | W | I | -911.978 |
| '0101010203010101040110 | V | D | I | H | I | V | L | V | L | W | R | -911.97  |
| '0201040405030101010101 | I | D | V | Q | V | L | L | V | V | W | H | -911.966 |
| '0101030105020103020101 | V | D | M | R | V | I | L | I | A | W | H | -911.96  |
| '0101030105030101070111 | V | D | M | R | V | L | L | V | T | W | T | -911.958 |
| '0101010103030301010106 | V | D | I | R | I | L | V | V | V | W | L | -911.948 |
| '0101010205040101070109 | V | D | I | H | V | M | L | V | T | W | Q | -911.928 |
| '0101010202010104020101 | V | D | I | H | F | V | L | L | A | W | H | -911.923 |
| '0301010103020101040105 | L | D | I | R | I | I | L | V | L | W | K | -911.92  |
| '0201010102010103010101 | I | D | I | R | F | V | L | I | V | W | H | -911.915 |
| '0101010105020201040112 | V | D | I | R | V | I | A | V | L | W | V | -911.908 |
| '0201030202030101010101 | I | D | M | H | F | L | L | V | V | W | H | -911.902 |
| '0101030102010103030112 | V | D | M | R | F | V | L | I | I | W | V | -911.9   |
| '0201010102020102010108 | I | D | I | R | F | I | L | A | V | W | N | -911.894 |
| '0101010205040101030105 | V | D | I | H | V | M | L | V | I | W | K | -911.892 |
| '0101030205030101010102 | V | D | M | H | V | L | L | V | V | W | E | -911.888 |
| '0101020102030101070110 | V | D | L | R | F | L | L | V | T | W | R | -911.886 |
| '0101040103020103050101 | V | D | V | R | I | I | L | I | M | W | H | -911.882 |
| '0101020105020101010105 | V | D | L | R | V | I | L | V | V | W | K | -911.879 |
| '0101040102020105010101 | V | D | V | R | F | I | L | M | V | W | H | -911.878 |
| '0101040103010103050110 | V | D | V | R | I | V | L | I | M | W | R | -911.876 |
| '0101010102010103050104 | V | D | I | R | F | V | L | I | M | W | I | -911.873 |
| '0101040102010104020101 | V | D | V | R | F | V | L | L | A | W | H | -911.871 |
| '0101010103030201040101 | V | D | I | R | I | L | A | V | L | W | H | -911.871 |



|                         |   |   |   |   |   |   |   |   |   |   |   |          |
|-------------------------|---|---|---|---|---|---|---|---|---|---|---|----------|
| '0101010205040101010110 | V | D | I | H | V | M | L | V | V | W | R | -911.867 |
| '0101040103030301020101 | V | D | V | R | I | L | V | V | A | W | H | -911.85  |
| '0101040105010201040106 | V | D | V | R | V | V | A | V | L | W | L | -911.845 |
| '0101020302010103010105 | V | D | L | K | F | V | L | I | V | W | K | -911.826 |
| '0101010103020101070105 | V | D | I | R | I | I | L | V | T | W | K | -911.825 |
| '0101010203030101050111 | V | D | I | H | I | L | L | V | M | W | T | -911.825 |
| '0101040402010101020108 | V | D | V | Q | F | V | L | V | A | W | N | -911.819 |
| '0101010205020103040101 | V | D | I | H | V | I | L | I | L | W | H | -911.809 |
| '0101010102020103070104 | V | D | I | R | F | I | L | I | T | W | I | -911.808 |
| '0101010105030201070112 | V | D | I | R | V | L | A | V | T | W | V | -911.808 |
| '0101010205010103040105 | V | D | I | H | V | V | L | I | L | W | K | -911.795 |
| '0101030201030101040112 | V | D | M | H | L | L | L | V | L | W | V | -911.794 |
| '0101010102030101060105 | V | D | I | R | F | L | L | V | S | W | K | -911.785 |
| '0201010102040101010109 | I | D | I | R | F | M | L | V | V | W | Q | -911.782 |
| '0101040102010103020108 | V | D | V | R | F | V | L | I | A | W | N | -911.78  |
| '0101010103020103010101 | V | D | I | R | I | I | L | I | V | W | H | -911.779 |
| '0101010102020104040105 | V | D | I | R | F | I | L | L | L | W | K | -911.779 |
| '0101020202010103010109 | V | D | L | H | F | V | L | I | V | W | Q | -911.775 |
| '0201010105020101070106 | I | D | I | R | V | I | L | V | T | W | L | -911.769 |
| '0101030105010101050105 | V | D | M | R | V | V | L | V | M | W | K | -911.733 |
| '0101030103010104010106 | V | D | M | R | I | V | L | L | V | W | L | -911.731 |
| '0101010405040101040106 | V | D | I | Q | V | M | L | V | L | W | L | -911.728 |
| '0301010202020101010104 | L | D | I | H | F | I | L | V | V | W | I | -911.725 |
| '0201010105010103020104 | I | D | I | R | V | V | L | I | A | W | I | -911.723 |
| '0101030204020101010112 | V | D | M | H | M | I | L | V | V | W | V | -911.722 |
| '0101040105030101030102 | V | D | V | R | V | L | L | V | I | W | E | -911.717 |
| '0101040305010101070104 | V | D | V | K | V | V | L | V | T | W | I | -911.716 |
| '0101030201030101070104 | V | D | M | H | L | L | L | V | T | W | I | -911.715 |
| '0101030203020101030101 | V | D | M | H | I | I | L | V | I | W | H | -911.71  |
| '0101030205010104010112 | V | D | M | H | V | V | L | L | V | W | V | -911.709 |
| '0101010203010203010101 | V | D | I | H | I | V | A | I | V | W | H | -911.705 |
| '0101030103020103010108 | V | D | M | R | I | I | L | I | V | W | N | -911.704 |
| '0101010305030101040105 | V | D | I | K | V | L | L | V | L | W | K | -911.702 |
| '0101030104020101040101 | V | D | M | R | M | I | L | V | L | W | H | -911.701 |
| '0101040105010104010102 | V | D | V | R | V | V | L | L | V | W | E | -911.701 |
| '0101010202010103040109 | V | D | I | H | F | V | L | I | L | W | Q | -911.7   |
| '0101010105020104020105 | V | D | I | R | V | I | L | L | A | W | K | -911.699 |

|                         |   |   |   |   |   |   |   |   |   |   |   |          |
|-------------------------|---|---|---|---|---|---|---|---|---|---|---|----------|
| '0101040205020101010105 | V | D | V | H | V | I | L | V | V | W | K | -911.697 |
| '0301040102010101040104 | L | D | V | R | F | V | L | V | L | W | I | -911.695 |
| '0101010103020301010105 | V | D | I | R | I | I | V | V | V | W | K | -911.687 |
| '0101030103030101030101 | V | D | M | R | I | L | L | V | I | W | H | -911.685 |
| '0101040405010103040101 | V | D | V | Q | V | V | L | I | L | W | H | -911.68  |
| '0101020102020101070104 | V | D | L | R | F | I | L | V | T | W | I | -911.678 |
| '0101040103020101070108 | V | D | V | R | I | I | L | V | T | W | N | -911.674 |
| '0101010103030101010104 | V | D | I | R | I | L | L | V | V | W | I | -911.674 |
| '0101010302040101010103 | V | D | I | K | F | M | L | V | V | W | F | -911.672 |
| '0101040105010103020101 | V | D | V | R | V | V | L | I | A | W | H | -911.669 |
| '0201010303020101010105 | I | D | I | K | I | I | L | V | V | W | K | -911.66  |
| '0101010105040101040107 | V | D | I | R | V | M | L | V | L | W | M | -911.647 |
| '0101040203010101070104 | V | D | V | H | I | V | L | V | T | W | I | -911.646 |
| '0101010202020102010105 | V | D | I | H | F | I | L | A | V | W | K | -911.646 |
| '0101020102010101010108 | V | D | L | R | F | V | L | V | V | W | N | -911.646 |
| '0201040103010103010101 | I | D | V | R | I | V | L | I | V | W | H | -911.644 |
| '0101040102010104010106 | V | D | V | R | F | V | L | L | V | W | L | -911.642 |
| '0101030205010101040102 | V | D | M | H | V | V | L | V | L | W | E | -911.642 |
| '0101040103010101050106 | V | D | V | R | I | V | L | V | M | W | L | -911.636 |
| '0301010105020103010104 | L | D | I | R | V | I | L | I | V | W | I | -911.632 |
| '0201040105030101040101 | I | D | V | R | V | L | L | V | L | W | H | -911.621 |
| '0101030403020101020101 | V | D | M | Q | I | I | L | V | A | W | H | -911.619 |
| '0101010302030101070111 | V | D | I | K | F | L | L | V | T | W | T | -911.616 |
| '0101010103040101040104 | V | D | I | R | I | M | L | V | L | W | I | -911.61  |
| '0101030204030103010101 | V | D | M | H | M | L | L | I | V | W | H | -911.597 |
| '0101010203020101010112 | V | D | I | H | I | I | L | V | V | W | V | -911.597 |
| '0101020102030101020101 | V | D | L | R | F | L | L | V | A | W | H | -911.595 |
| '0101040102030301070101 | V | D | V | R | F | L | V | V | T | W | H | -911.59  |
| '0101020203020101010102 | V | D | L | H | I | I | L | V | V | W | E | -911.588 |
| '0101010102030103070105 | V | D | I | R | F | L | L | I | T | W | K | -911.584 |
| '0201040102040101010104 | I | D | V | R | F | M | L | V | V | W | I | -911.569 |
| '0201010102020103010106 | I | D | I | R | F | I | L | I | V | W | L | -911.566 |
| '0101010103030103050105 | V | D | I | R | I | L | L | I | M | W | K | -911.564 |
| '0101010102030104010112 | V | D | I | R | F | L | L | L | V | W | V | -911.556 |
| '0101040405030101010110 | V | D | V | Q | V | L | L | V | V | W | R | -911.554 |
| '0101040102030201040101 | V | D | V | R | F | L | A | V | L | W | H | -911.554 |
| '0101010102010303010104 | V | D | I | R | F | V | V | I | V | W | I | -911.554 |

|                         |   |   |   |   |   |   |   |   |   |   |   |          |
|-------------------------|---|---|---|---|---|---|---|---|---|---|---|----------|
| '0301010205020101010112 | L | D | I | H | V | I | L | V | V | W | V | -911.542 |
| '0101010102020201040109 | V | D | I | R | F | I | A | V | L | W | Q | -911.534 |
| '0101030402010101010105 | V | D | M | Q | F | V | L | V | V | W | K | -911.531 |
| '0101030405020101010112 | V | D | M | Q | V | I | L | V | V | W | V | -911.527 |
| '0101010105040101030104 | V | D | I | R | V | M | L | V | I | W | I | -911.515 |
| '0101010102010105010109 | V | D | I | R | F | V | L | M | V | W | Q | -911.511 |
| '0101010302030101050105 | V | D | I | K | F | L | L | V | M | W | K | -911.51  |
| '0201010405020101010108 | I | D | I | Q | V | I | L | V | V | W | N | -911.51  |
| '0101030103010101040101 | V | D | M | R | I | V | L | V | L | W | H | -911.506 |
| '0101030405010103010112 | V | D | M | Q | V | V | L | I | V | W | V | -911.501 |
| '0101020402020101010101 | V | D | L | Q | F | I | L | V | V | W | H | -911.5   |
| '0101010402020101030112 | V | D | I | Q | F | I | L | V | I | W | V | -911.496 |
| '0101030105010104040104 | V | D | M | R | V | V | L | L | L | W | I | -911.49  |
| '0101040102030101030101 | V | D | V | R | F | L | L | V | I | W | H | -911.485 |
| '0101010102020101050109 | V | D | I | R | F | I | L | V | M | W | Q | -911.483 |
| '0101030103020101020102 | V | D | M | R | I | I | L | V | A | W | E | -911.479 |
| '0201030102030101010110 | I | D | M | R | F | L | L | V | V | W | R | -911.464 |
| '0101010302030101010106 | V | D | I | K | F | L | L | V | V | W | L | -911.456 |
| '0101040205020101030101 | V | D | V | H | V | I | L | V | I | W | H | -911.454 |
| '0101040105020101020102 | V | D | V | R | V | I | L | V | A | W | E | -911.447 |
| '0101040102030103020101 | V | D | V | R | F | L | L | I | A | W | H | -911.444 |
| '0201010105030103010103 | I | D | I | R | V | L | L | I | V | W | F | -911.439 |
| '0101010102040103010105 | V | D | I | R | F | M | L | I | V | W | K | -911.439 |
| '0201010203020101040101 | I | D | I | H | I | I | L | V | L | W | H | -911.433 |
| '0201010202040101010104 | I | D | I | H | F | M | L | V | V | W | I | -911.432 |
| '0101010302020101010102 | V | D | I | K | F | I | L | V | V | W | E | -911.428 |
| '0101010102020104070101 | V | D | I | R | F | I | L | L | T | W | H | -911.427 |
| '0201030103020101010108 | I | D | M | R | I | I | L | V | V | W | N | -911.422 |
| '0101010302040101030106 | V | D | I | K | F | M | L | V | I | W | L | -911.419 |
| '0101040105030104010105 | V | D | V | R | V | L | L | L | V | W | K | -911.417 |
| '0101010202010104010105 | V | D | I | H | F | V | L | L | V | W | K | -911.413 |
| '0101010102020201070104 | V | D | I | R | F | I | A | V | T | W | I | -911.411 |
| '0101040102010201010109 | V | D | V | R | F | V | A | V | V | W | Q | -911.409 |
| '0201010102010105010108 | I | D | I | R | F | V | L | M | V | W | N | -911.4   |
| '0201010105040101040105 | I | D | I | R | V | M | L | V | L | W | K | -911.399 |
| '0301010202020102010101 | L | D | I | H | F | I | L | A | V | W | H | -911.394 |
| '0201040105010105010101 | I | D | V | R | V | V | L | M | V | W | H | -911.392 |

|                         |   |   |   |   |   |   |   |   |   |   |   |          |
|-------------------------|---|---|---|---|---|---|---|---|---|---|---|----------|
| '0101030105040101020106 | V | D | M | R | V | M | L | V | A | W | L | -911.375 |
| '0101010402030101050106 | V | D | I | Q | F | L | L | V | M | W | L | -911.375 |
| '0201040105010103070101 | I | D | V | R | V | V | L | I | T | W | H | -911.373 |
| '0101030202010101040108 | V | D | M | H | F | V | L | V | L | W | N | -911.362 |
| '0101010104010103030110 | V | D | I | R | M | V | L | I | I | W | R | -911.353 |
| '0101010105040101050105 | V | D | I | R | V | M | L | V | M | W | K | -911.343 |
| '0101010202020101050107 | V | D | I | H | F | I | L | V | M | W | M | -911.342 |
| '0101030302010103010107 | V | D | M | K | F | V | L | I | V | W | M | -911.335 |
| '0101040105010104020108 | V | D | V | R | V | V | L | L | A | W | N | -911.334 |
| '0101010305020101070109 | V | D | I | K | V | I | L | V | T | W | Q | -911.334 |
| '0101010103020201030112 | V | D | I | R | I | I | A | V | I | W | V | -911.328 |
| '0101030105030103010101 | V | D | M | R | V | L | L | I | V | W | H | -911.326 |
| '0101020302020101010109 | V | D | L | K | F | I | L | V | V | W | Q | -911.325 |
| '0101040203020101070101 | V | D | V | H | I | I | L | V | T | W | H | -911.321 |
| '0201030105010101040105 | I | D | M | R | V | V | L | V | L | W | K | -911.319 |
| '0201040102010105010109 | I | D | V | R | F | V | L | M | V | W | Q | -911.318 |
| '0101010102010104010102 | V | D | I | R | F | V | L | L | V | W | E | -911.314 |
| '0101040102010105010105 | V | D | V | R | F | V | L | M | V | W | K | -911.302 |
| '0101020102020101030112 | V | D | L | R | F | I | L | V | I | W | V | -911.298 |
| '0101030105040101050110 | V | D | M | R | V | M | L | V | M | W | R | -911.289 |
| '0101030204020101070101 | V | D | M | H | M | I | L | V | T | W | H | -911.272 |
| '0101010102010101070104 | V | D | I | R | F | V | L | V | T | W | I | -911.267 |
| '0101010103020101020101 | V | D | I | R | I | I | L | V | A | W | H | -911.26  |
| '0101010302020101070107 | V | D | I | K | F | I | L | V | T | W | M | -911.258 |
| '0101010202010105010104 | V | D | I | H | F | V | L | M | V | W | I | -911.254 |
| '0301010203020101010101 | L | D | I | H | I | I | L | V | V | W | H | -911.25  |
| '0101030302010103070101 | V | D | M | K | F | V | L | I | T | W | H | -911.25  |
| '0101040105010104070104 | V | D | V | R | V | V | L | L | T | W | I | -911.241 |
| '0101020105010103010106 | V | D | L | R | V | V | L | I | V | W | L | -911.239 |
| '0101030201020101070110 | V | D | M | H | L | I | L | V | T | W | R | -911.224 |
| '0101030102010104010109 | V | D | M | R | F | V | L | L | V | W | Q | -911.223 |
| '0101040402030101010109 | V | D | V | Q | F | L | L | V | V | W | Q | -911.188 |
| '0101030402020101010103 | V | D | M | Q | F | I | L | V | V | W | F | -911.184 |
| '0101040202030301010101 | V | D | V | H | F | L | V | V | V | W | H | -911.184 |
| '0101030102030103040101 | V | D | M | R | F | L | L | I | L | W | H | -911.18  |
| '0101010104040101010106 | V | D | I | R | M | M | L | V | V | W | L | -911.178 |
| '0101040103020101030110 | V | D | V | R | I | I | L | V | I | W | R | -911.171 |

|                         |   |   |   |   |   |   |   |   |   |   |   |          |
|-------------------------|---|---|---|---|---|---|---|---|---|---|---|----------|
| '0101040201030101040106 | V | D | V | H | L | L | L | V | L | W | L | -911.166 |
| '0101040105010403010104 | V | D | V | R | V | V | W | I | V | W | I | -911.153 |
| '0101040304010101040106 | V | D | V | K | M | V | L | V | L | W | L | -911.152 |
| '0101030102040101070110 | V | D | M | R | F | M | L | V | T | W | R | -911.152 |
| '0101040105040101040105 | V | D | V | R | V | M | L | V | L | W | K | -911.145 |
| '0101010102040101050104 | V | D | I | R | F | M | L | V | M | W | I | -911.141 |
| '0101040103010104020111 | V | D | V | R | I | V | L | L | A | W | T | -911.14  |
| '0101030105020101020107 | V | D | M | R | V | I | L | V | A | W | M | -911.136 |
| '0101040105010101040101 | V | D | V | R | V | V | L | V | L | W | H | -911.135 |
| '0101030105010101010104 | V | D | M | R | V | V | L | V | V | W | I | -911.131 |
| '0101020205010101040104 | V | D | L | H | V | V | L | V | L | W | I | -911.131 |
| '0101040105010105010110 | V | D | V | R | V | V | L | M | V | W | R | -911.13  |
| '0101010202020104010106 | V | D | I | H | F | I | L | L | V | W | L | -911.128 |
| '0101010405020101070104 | V | D | I | Q | V | I | L | V | T | W | I | -911.124 |
| '0301010102020101010110 | L | D | I | R | F | I | L | V | V | W | R | -911.111 |
| '0101030102020102010104 | V | D | M | R | F | I | L | A | V | W | I | -911.109 |
| '0101030205010103010103 | V | D | M | H | V | V | L | I | V | W | F | -911.108 |
| '0201010103030101030105 | I | D | I | R | I | L | L | V | I | W | K | -911.106 |
| '0101010205020101010106 | V | D | I | H | V | I | L | V | V | W | L | -911.104 |
| '0101030103010101050104 | V | D | M | R | I | V | L | V | M | W | I | -911.1   |
| '0101030303020101010105 | V | D | M | K | I | I | L | V | V | W | K | -911.094 |
| '0101010103010103010106 | V | D | I | R | I | V | L | I | V | W | L | -911.089 |
| '0101040102020203010101 | V | D | V | R | F | I | A | I | V | W | H | -911.087 |
| '0101030102020201040101 | V | D | M | R | F | I | A | V | L | W | H | -911.086 |
| '0201010105010105040104 | I | D | I | R | V | V | L | M | L | W | I | -911.08  |
| '0201040102030101010108 | I | D | V | R | F | L | L | V | V | W | N | -911.073 |
| '0101030201020103010112 | V | D | M | H | L | I | L | I | V | W | V | -911.072 |
| '0101020205010103010101 | V | D | L | H | V | V | L | I | V | W | H | -911.066 |
| '0101030205010201040101 | V | D | M | H | V | V | A | V | L | W | H | -911.064 |
| '0101010102030103010103 | V | D | I | R | F | L | L | I | V | W | F | -911.057 |
| '0101040102030101020102 | V | D | V | R | F | L | L | V | A | W | E | -911.046 |
| '0101020102020101050102 | V | D | L | R | F | I | L | V | M | W | E | -911.045 |
| '0101020203020101020101 | V | D | L | H | I | I | L | V | A | W | H | -911.044 |
| '0301010102020101020105 | L | D | I | R | F | I | L | V | A | W | K | -911.041 |
| '0101040102010103070106 | V | D | V | R | F | V | L | I | T | W | L | -911.04  |
| '0101010402010201040106 | V | D | I | Q | F | V | A | V | L | W | L | -911.039 |
| '0101010102030203010108 | V | D | I | R | F | L | A | I | V | W | N | -911.034 |

|                         |   |   |   |   |   |   |   |   |   |   |   |          |
|-------------------------|---|---|---|---|---|---|---|---|---|---|---|----------|
| '0301010102020101040108 | L | D | I | R | F | I | L | V | L | W | N | -911.033 |
| '0101010304010103040101 | V | D | I | K | M | V | L | I | L | W | H | -911.026 |
| '0201010201030103010112 | I | D | I | H | L | L | L | I | V | W | V | -911.026 |
| '0101040104030101070110 | V | D | V | R | M | L | L | V | T | W | R | -911.024 |
| '0201010101030101040106 | I | D | I | R | L | L | L | V | L | W | L | -911.024 |
| '0101010202030101050103 | V | D | I | H | F | L | L | V | M | W | F | -911.019 |
| '0201020102020101010105 | I | D | L | R | F | I | L | V | V | W | K | -911.019 |
| '0201010103030101020111 | I | D | I | R | I | L | L | V | A | W | T | -911.019 |
| '0101040302010101020106 | V | D | V | K | F | V | L | V | A | W | L | -911.011 |
| '0101040102030101070103 | V | D | V | R | F | L | L | V | T | W | F | -911.01  |
| '0101010302040101020105 | V | D | I | K | F | M | L | V | A | W | K | -911.007 |
| '0101010103030103010108 | V | D | I | R | I | L | L | I | V | W | N | -911.006 |
| '0101010302020101040106 | V | D | I | K | F | I | L | V | L | W | L | -911.005 |
| '0101010302010103030112 | V | D | I | K | F | V | L | I | I | W | V | -911.005 |
| '0101040104020104010105 | V | D | V | R | M | I | L | L | V | W | K | -910.999 |
| '0101030103020103040101 | V | D | M | R | I | I | L | I | L | W | H | -910.987 |
| '0101010205020203010101 | V | D | I | H | V | I | A | I | V | W | H | -910.975 |
| '0101010205020101050110 | V | D | I | H | V | I | L | V | M | W | R | -910.973 |
| '0101030405010103070101 | V | D | M | Q | V | V | L | I | T | W | H | -910.968 |
| '0101010105020203040101 | V | D | I | R | V | I | A | I | L | W | H | -910.968 |
| '0201030103010101040104 | I | D | M | R | I | V | L | V | L | W | I | -910.968 |
| '0101010202010104040110 | V | D | I | H | F | V | L | L | L | W | R | -910.964 |
| '0101040403030101010104 | V | D | V | Q | I | L | L | V | V | W | I | -910.953 |
| '0101010103020201040106 | V | D | I | R | I | I | A | V | L | W | L | -910.951 |
| '0101010203040101040109 | V | D | I | H | I | M | L | V | L | W | Q | -910.948 |
| '0101010202010103020108 | V | D | I | H | F | V | L | I | A | W | N | -910.943 |
| '0101010102030101070112 | V | D | I | R | F | L | L | V | T | W | V | -910.94  |
| '0101040105010104040109 | V | D | V | R | V | V | L | L | L | W | Q | -910.926 |
| '0201010102010103040104 | I | D | I | R | F | V | L | I | L | W | I | -910.911 |
| '0101030102010101070112 | V | D | M | R | F | V | L | V | T | W | V | -910.906 |
| '0201010102020101030101 | I | D | I | R | F | I | L | V | I | W | H | -910.905 |
| '0101040102030301010112 | V | D | V | R | F | L | V | V | V | W | V | -910.904 |
| '0101010402010103070106 | V | D | I | Q | F | V | L | I | T | W | L | -910.903 |
| '0101040304020101010110 | V | D | V | K | M | I | L | V | V | W | R | -910.902 |
| '0101010402030201010105 | V | D | I | Q | F | L | A | V | V | W | K | -910.898 |
| '0101030102020101010111 | V | D | M | R | F | I | L | V | V | W | T | -910.897 |
| '0101030105040101070112 | V | D | M | R | V | M | L | V | T | W | V | -910.897 |

|                         |   |   |   |   |   |   |   |   |   |   |   |          |
|-------------------------|---|---|---|---|---|---|---|---|---|---|---|----------|
| '0101030105010104010101 | V | D | M | R | V | V | L | L | V | W | H | -910.897 |
| '0101040103010101040104 | V | D | V | R | I | V | L | V | L | W | I | -910.894 |
| '0101010405010103030112 | V | D | I | Q | V | V | L | I | I | W | V | -910.887 |
| '0201040203030101010101 | I | D | V | H | I | L | L | V | V | W | H | -910.885 |
| '0101010302040101070109 | V | D | I | K | F | M | L | V | T | W | Q | -910.883 |
| '0101010405030101010111 | V | D | I | Q | V | L | L | V | V | W | T | -910.865 |
| '0101030105010203010101 | V | D | M | R | V | V | A | I | V | W | H | -910.861 |
| '0101010205020104010104 | V | D | I | H | V | I | L | L | V | W | I | -910.858 |
| '0101020202010101040110 | V | D | L | H | F | V | L | V | L | W | R | -910.845 |
| '0101010402010103010102 | V | D | I | Q | F | V | L | I | V | W | E | -910.842 |
| '0101030101030103040110 | V | D | M | R | L | L | L | I | L | W | R | -910.839 |
| '0101010102040101010112 | V | D | I | R | F | M | L | V | V | W | V | -910.832 |
| '0201010103010103020112 | I | D | I | R | I | V | L | I | A | W | V | -910.83  |
| '0101030302030101010112 | V | D | M | K | F | L | L | V | V | W | V | -910.829 |
| '0301040102010101010101 | L | D | V | R | F | V | L | V | V | W | H | -910.825 |
| '0101030402010103040101 | V | D | M | Q | F | V | L | I | L | W | H | -910.822 |
| '0301030103020101010104 | L | D | M | R | I | I | L | V | V | W | I | -910.809 |
| '0101010102040101040110 | V | D | I | R | F | M | L | V | L | W | R | -910.807 |
| '0101020102010104040106 | V | D | L | R | F | V | L | L | L | W | L | -910.801 |
| '0101030105010101040110 | V | D | M | R | V | V | L | V | L | W | R | -910.798 |
| '0101040101020103010105 | V | D | V | R | L | I | L | I | V | W | K | -910.798 |
| '0101010302010104010112 | V | D | I | K | F | V | L | L | V | W | V | -910.797 |
| '0101030102010104050101 | V | D | M | R | F | V | L | L | M | W | H | -910.784 |
| '0101020202030101010107 | V | D | L | H | F | L | L | V | V | W | M | -910.779 |
| '0101030103030101050106 | V | D | M | R | I | L | L | V | M | W | L | -910.772 |
| '0201040102020103010101 | I | D | V | R | F | I | L | I | V | W | H | -910.768 |
| '0101010305020101030108 | V | D | I | K | V | I | L | V | I | W | N | -910.764 |
| '0101010104030101040106 | V | D | I | R | M | L | L | V | L | W | L | -910.762 |
| '0101030105010101030112 | V | D | M | R | V | V | L | V | I | W | V | -910.758 |
| '0101030105040101040109 | V | D | M | R | V | M | L | V | L | W | Q | -910.751 |
| '0101010105020403010104 | V | D | I | R | V | I | W | I | V | W | I | -910.75  |
| '0101010303010103040108 | V | D | I | K | I | V | L | I | L | W | N | -910.738 |
| '0101010203030101030107 | V | D | I | H | I | L | L | V | I | W | M | -910.737 |
| '0101040202020101010103 | V | D | V | H | F | I | L | V | V | W | F | -910.736 |
| '0101030203040101010110 | V | D | M | H | I | M | L | V | V | W | R | -910.725 |
| '0201010103030101040109 | I | D | I | R | I | L | L | V | L | W | Q | -910.722 |
| '0101010202030104010110 | V | D | I | H | F | L | L | L | V | W | R | -910.72  |

|                         |   |   |   |   |   |   |   |   |   |   |   |          |
|-------------------------|---|---|---|---|---|---|---|---|---|---|---|----------|
| '0201010105030101070109 | I | D | I | R | V | L | L | V | T | W | Q | -910.717 |
| '0101010402010104040106 | V | D | I | Q | F | V | L | L | L | W | L | -910.712 |
| '0101030102020101060110 | V | D | M | R | F | I | L | V | S | W | R | -910.701 |
| '0101030103030103010105 | V | D | M | R | I | L | L | I | V | W | K | -910.697 |
| '0101040103040101040106 | V | D | V | R | I | M | L | V | L | W | L | -910.694 |
| '0301030102020101010106 | L | D | M | R | F | I | L | V | V | W | L | -910.692 |
| '0101010202040103010112 | V | D | I | H | F | M | L | I | V | W | V | -910.69  |
| '0101010102010201010104 | V | D | I | R | F | V | A | V | V | W | I | -910.688 |
| '0101010402020103020101 | V | D | I | Q | F | I | L | I | A | W | H | -910.687 |
| '0101040105030301050101 | V | D | V | R | V | L | V | V | M | W | H | -910.678 |
| '0101020102010101040101 | V | D | L | R | F | V | L | V | L | W | H | -910.677 |
| '0101030301030101040106 | V | D | M | K | L | L | L | V | L | W | L | -910.666 |
| '0101010203040101030104 | V | D | I | H | I | M | L | V | I | W | I | -910.664 |
| '0101010102020103010110 | V | D | I | R | F | I | L | I | V | W | R | -910.662 |
| '0101010103010101040106 | V | D | I | R | I | V | L | V | L | W | L | -910.662 |
| '0101010204020101020106 | V | D | I | H | M | I | L | V | A | W | L | -910.661 |
| '0101030305010103040101 | V | D | M | K | V | V | L | I | L | W | H | -910.657 |
| '0101030202040101040101 | V | D | M | H | F | M | L | V | L | W | H | -910.649 |
| '0101010102010203030112 | V | D | I | R | F | V | A | I | I | W | V | -910.643 |
| '0201010101030103040105 | I | D | I | R | L | L | L | I | L | W | K | -910.641 |
| '0101010405020101050102 | V | D | I | Q | V | I | L | V | M | W | E | -910.64  |
| '0101030202010101050110 | V | D | M | H | F | V | L | V | M | W | R | -910.64  |
| '0101040102010101010107 | V | D | V | R | F | V | L | V | V | W | M | -910.636 |
| '0101010202010201040104 | V | D | I | H | F | V | A | V | L | W | I | -910.636 |
| '0201040102040102010101 | I | D | V | R | F | M | L | A | V | W | H | -910.627 |
| '0101020102010103040108 | V | D | L | R | F | V | L | I | L | W | N | -910.626 |
| '0101030303030101020101 | V | D | M | K | I | L | L | V | A | W | H | -910.623 |
| '0101010103010101030112 | V | D | I | R | I | V | L | V | I | W | V | -910.621 |
| '0101040203010104070101 | V | D | V | H | I | V | L | L | T | W | H | -910.62  |
| '0101040105020104020101 | V | D | V | R | V | I | L | L | A | W | H | -910.614 |
| '0101010402010101040105 | V | D | I | Q | F | V | L | V | L | W | K | -910.613 |
| '0301010405020101010104 | L | D | I | Q | V | I | L | V | V | W | I | -910.605 |
| '0301040202010101010106 | L | D | V | H | F | V | L | V | V | W | L | -910.601 |
| '0101010103030101070108 | V | D | I | R | I | L | L | V | T | W | N | -910.599 |
| '0101040102010101020109 | V | D | V | R | F | V | L | V | A | W | Q | -910.596 |
| '0201010102030101050109 | I | D | I | R | F | L | L | V | M | W | Q | -910.589 |
| '0301040105010104070101 | L | D | V | R | V | V | L | L | T | W | H | -910.589 |



|                         |   |   |   |   |   |   |   |   |   |   |   |          |
|-------------------------|---|---|---|---|---|---|---|---|---|---|---|----------|
| '0201030102010101020104 | I | D | M | R | F | V | L | V | A | W | I | -910.588 |
| '0101020202030101040101 | V | D | L | H | F | L | L | V | L | W | H | -910.586 |
| '0101030405030101010109 | V | D | M | Q | V | L | L | V | V | W | Q | -910.58  |
| '0101010102020104010109 | V | D | I | R | F | I | L | L | V | W | Q | -910.574 |
| '0201040105010101020108 | I | D | V | R | V | V | L | V | A | W | N | -910.569 |
| '0101020102040101010105 | V | D | L | R | F | M | L | V | V | W | K | -910.565 |
| '0101010204040101040110 | V | D | I | H | M | M | L | V | L | W | R | -910.561 |
| '0101010205020101040105 | V | D | I | H | V | I | L | V | L | W | K | -910.56  |
| '0101010204040101070104 | V | D | I | H | M | M | L | V | T | W | I | -910.555 |
| '0101010105020201020110 | V | D | I | R | V | I | A | V | A | W | R | -910.555 |
| '0101040103010303010105 | V | D | V | R | I | V | V | I | V | W | K | -910.546 |
| '0101010102010304010106 | V | D | I | R | F | V | V | L | V | W | L | -910.541 |
| '0301010202010104010101 | L | D | I | H | F | V | L | L | V | W | H | -910.539 |
| '0101040202010204010101 | V | D | V | H | F | V | A | L | V | W | H | -910.539 |
| '0101030102010101030104 | V | D | M | R | F | V | L | V | I | W | I | -910.537 |
| '0101040204010104010109 | V | D | V | H | M | V | L | L | V | W | Q | -910.533 |
| '0101010303020101030106 | V | D | I | K | I | I | L | V | I | W | L | -910.531 |
| '0101010103030301070109 | V | D | I | R | I | L | V | V | T | W | Q | -910.525 |
| '0101010203020101020104 | V | D | I | H | I | I | L | V | A | W | I | -910.524 |
| '0301010103020102010112 | L | D | I | R | I | I | L | A | V | W | V | -910.521 |
| '0301010403020101010106 | L | D | I | Q | I | I | L | V | V | W | L | -910.5   |
| '0101020302030101070101 | V | D | L | K | F | L | L | V | T | W | H | -910.496 |
| '0201010102040101070112 | I | D | I | R | F | M | L | V | T | W | V | -910.489 |
| '0101010403010103030109 | V | D | I | Q | I | V | L | I | I | W | Q | -910.488 |
| '0201010102020201010109 | I | D | I | R | F | I | A | V | V | W | Q | -910.486 |
| '0101020104030101040104 | V | D | L | R | M | L | L | V | L | W | I | -910.484 |
| '0101030202010101070105 | V | D | M | H | F | V | L | V | T | W | K | -910.477 |
| '0101040104010105040106 | V | D | V | R | M | V | L | M | L | W | L | -910.476 |
| '0101010102010103060105 | V | D | I | R | F | V | L | I | S | W | K | -910.476 |
| '0301010105020104010106 | L | D | I | R | V | I | L | L | V | W | L | -910.474 |
| '0101030202010104010102 | V | D | M | H | F | V | L | L | V | W | E | -910.473 |
| '0101040105020101060111 | V | D | V | R | V | I | L | V | S | W | T | -910.463 |
| '0101040402020101020101 | V | D | V | Q | F | I | L | V | A | W | H | -910.456 |
| '0101030105020201020101 | V | D | M | R | V | I | A | V | A | W | H | -910.456 |
| '0101030102020201010105 | V | D | M | R | F | I | A | V | V | W | K | -910.453 |
| '0101040103010104040105 | V | D | V | R | I | V | L | L | L | W | K | -910.452 |
| '0201010201010103040104 | I | D | I | H | L | V | L | I | L | W | I | -910.452 |

|                         |   |   |   |   |   |   |   |   |   |   |   |          |
|-------------------------|---|---|---|---|---|---|---|---|---|---|---|----------|
| '0101030202020104010101 | V | D | M | H | F | I | L | L | V | W | H | -910.45  |
| '0101010105030301040104 | V | D | I | R | V | L | V | V | L | W | I | -910.448 |
| '0101040102010403010112 | V | D | V | R | F | V | W | I | V | W | V | -910.447 |
| '0101020402010103010106 | V | D | L | Q | F | V | L | I | V | W | L | -910.447 |
| '0101040305030101010103 | V | D | V | K | V | L | L | V | V | W | F | -910.442 |
| '0201010102030101030102 | I | D | I | R | F | L | L | V | I | W | E | -910.439 |
| '0201030103030101010106 | I | D | M | R | I | L | L | V | V | W | L | -910.436 |
| '0101010102030301040110 | V | D | I | R | F | L | V | V | L | W | R | -910.435 |
| '0101010103020401040104 | V | D | I | R | I | I | W | V | L | W | I | -910.435 |
| '0101040105040103010104 | V | D | V | R | V | M | L | I | V | W | I | -910.434 |
| '0201010105010105010106 | I | D | I | R | V | V | L | M | V | W | L | -910.432 |
| '0101010105010104040107 | V | D | I | R | V | V | L | L | L | W | M | -910.432 |
| '0101020103020101040108 | V | D | L | R | I | I | L | V | L | W | N | -910.427 |
| '0101040401030101040112 | V | D | V | Q | L | L | L | V | L | W | V | -910.423 |
| '0201040105040101010110 | I | D | V | R | V | M | L | V | V | W | R | -910.423 |
| '0301040102020101040101 | L | D | V | R | F | I | L | V | L | W | H | -910.422 |
| '0101040203010101050109 | V | D | V | H | I | V | L | V | M | W | Q | -910.421 |
| '0101010202010201070112 | V | D | I | H | F | V | A | V | T | W | V | -910.417 |
| '0101040103020105010104 | V | D | V | R | I | I | L | M | V | W | I | -910.412 |
| '0101040202010101010108 | V | D | V | H | F | V | L | V | V | W | N | -910.41  |
| '0201010102030102070101 | I | D | I | R | F | L | L | A | T | W | H | -910.41  |
| '0101010202010105040105 | V | D | I | H | F | V | L | M | L | W | K | -910.405 |
| '0101010302030201010110 | V | D | I | K | F | L | A | V | V | W | R | -910.404 |
| '0101010102020201030110 | V | D | I | R | F | I | A | V | I | W | R | -910.399 |
| '0101010105020201030108 | V | D | I | R | V | I | A | V | I | W | N | -910.397 |
| '0101030302010101040101 | V | D | M | K | F | V | L | V | L | W | H | -910.396 |
| '0101020103020103010110 | V | D | L | R | I | I | L | I | V | W | R | -910.395 |
| '0201010104010103070106 | I | D | I | R | M | V | L | I | T | W | L | -910.392 |
| '0201030105010101070106 | I | D | M | R | V | V | L | V | T | W | L | -910.388 |
| '0201040105020102010101 | I | D | V | R | V | I | L | A | V | W | H | -910.388 |
| '0101030303010101040106 | V | D | M | K | I | V | L | V | L | W | L | -910.386 |
| '0101040202010103010111 | V | D | V | H | F | V | L | I | V | W | T | -910.383 |
| '0101010304020101040101 | V | D | I | K | M | I | L | V | L | W | H | -910.381 |
| '0201010202030101050101 | I | D | I | H | F | L | L | V | M | W | H | -910.38  |
| '0101030102030201020101 | V | D | M | R | F | L | A | V | A | W | H | -910.378 |
| '0101040405020101010104 | V | D | V | Q | V | I | L | V | V | W | I | -910.377 |
| '0301010105020101020112 | L | D | I | R | V | I | L | V | A | W | V | -910.376 |

|                         |   |   |   |   |   |   |   |   |   |   |   |          |
|-------------------------|---|---|---|---|---|---|---|---|---|---|---|----------|
| '0101010102010201040101 | V | D | I | R | F | V | A | V | L | W | H | -910.371 |
| '0101020103010103040106 | V | D | L | R | I | V | L | I | L | W | L | -910.369 |
| '0101010302020101020103 | V | D | I | K | F | I | L | V | A | W | F | -910.367 |
| '0301030202020101010101 | L | D | M | H | F | I | L | V | V | W | H | -910.365 |
| '0301010105010101010104 | L | D | I | R | V | V | L | V | V | W | I | -910.358 |
| '0101030302020101060101 | V | D | M | K | F | I | L | V | S | W | H | -910.355 |
| '0101020105020103050101 | V | D | L | R | V | I | L | I | M | W | H | -910.355 |
| '0101040403010103010106 | V | D | V | Q | I | V | L | I | V | W | L | -910.354 |
| '0101010305020104010110 | V | D | I | K | V | I | L | L | V | W | R | -910.352 |
| '0101030305010104010110 | V | D | M | K | V | V | L | L | V | W | R | -910.348 |
| '0101040305020101040101 | V | D | V | K | V | I | L | V | L | W | H | -910.343 |
| '0101040105030401010101 | V | D | V | R | V | L | W | V | V | W | H | -910.334 |
| '0101010102020203010104 | V | D | I | R | F | I | A | I | V | W | I | -910.332 |
| '0201010105030103050101 | I | D | I | R | V | L | L | I | M | W | H | -910.332 |
| '0101030102010104070110 | V | D | M | R | F | V | L | L | T | W | R | -910.331 |
| '0201040402040101010101 | I | D | V | Q | F | M | L | V | V | W | H | -910.33  |
| '0201010105040101010104 | I | D | I | R | V | M | L | V | V | W | I | -910.33  |
| '0101030103040101040111 | V | D | M | R | I | M | L | V | L | W | T | -910.329 |
| '0201040103010101070101 | I | D | V | R | I | V | L | V | T | W | H | -910.328 |
| '0101030302040101010108 | V | D | M | K | F | M | L | V | V | W | N | -910.327 |
| '0201020102030103010101 | I | D | L | R | F | L | L | I | V | W | H | -910.327 |
| '0101040203010104010107 | V | D | V | H | I | V | L | L | V | W | M | -910.325 |
| '0101040202040101010101 | V | D | V | H | F | M | L | V | V | W | H | -910.324 |
| '0101040105010301070104 | V | D | V | R | V | V | V | V | T | W | I | -910.322 |
| '0101010202020101030105 | V | D | I | H | F | I | L | V | I | W | K | -910.321 |
| '0101040405010101040107 | V | D | V | Q | V | V | L | V | L | W | M | -910.321 |
| '0101010105010104020101 | V | D | I | R | V | V | L | L | A | W | H | -910.319 |
| '0201010105020102010103 | I | D | I | R | V | I | L | A | V | W | F | -910.317 |
| '0101010102020201010103 | V | D | I | R | F | I | A | V | V | W | F | -910.317 |
| '0101030203010104010104 | V | D | M | H | I | V | L | L | V | W | I | -910.311 |
| '0201040202010101010104 | I | D | V | H | F | V | L | V | V | W | I | -910.311 |
| '0101040103020101020112 | V | D | V | R | I | I | L | V | A | W | V | -910.296 |
| '0101010105020303010108 | V | D | I | R | V | I | V | I | V | W | N | -910.293 |
| '0101040403020101010108 | V | D | V | Q | I | I | L | V | V | W | N | -910.293 |
| '0101010202010103010101 | V | D | I | H | F | V | L | I | V | W | H | -910.288 |
| '0201010205010101010105 | I | D | I | H | V | V | L | V | V | W | K | -910.287 |
| '0101010102030401010110 | V | D | I | R | F | L | W | V | V | W | R | -910.284 |

|                         |   |   |   |   |   |   |   |   |   |   |   |          |
|-------------------------|---|---|---|---|---|---|---|---|---|---|---|----------|
| '0201010402030102010101 | I | D | I | Q | F | L | L | A | V | W | H | -910.284 |
| '0101010405020101060111 | V | D | I | Q | V | I | L | V | S | W | T | -910.282 |
| '0101030402020201010101 | V | D | M | Q | F | I | A | V | V | W | H | -910.281 |
| '0101030202010103060101 | V | D | M | H | F | V | L | I | S | W | H | -910.28  |
| '0101030305020101010107 | V | D | M | K | V | I | L | V | V | W | M | -910.27  |
| '0101040102030101060110 | V | D | V | R | F | L | L | V | S | W | R | -910.27  |
| '0101030102020104010105 | V | D | M | R | F | I | L | L | V | W | K | -910.266 |
| '0101010405030101050104 | V | D | I | Q | V | L | L | V | M | W | I | -910.258 |
| '0201040103020101010105 | I | D | V | R | I | I | L | V | V | W | K | -910.256 |
| '0201010105020101020107 | I | D | I | R | V | I | L | V | A | W | M | -910.251 |
| '0101030102020401010101 | V | D | M | R | F | I | W | V | V | W | H | -910.25  |
| '0101030205010101050109 | V | D | M | H | V | V | L | V | M | W | Q | -910.248 |
| '0101030305030101010104 | V | D | M | K | V | L | L | V | V | W | I | -910.243 |
| '0101030201020101030104 | V | D | M | H | L | I | L | V | I | W | I | -910.242 |
| '0101020203010101040106 | V | D | L | H | I | V | L | V | L | W | L | -910.242 |
| '0101010203030101010109 | V | D | I | H | I | L | L | V | V | W | Q | -910.242 |
| '0101030205010101030108 | V | D | M | H | V | V | L | V | I | W | N | -910.241 |
| '0101040103030104010106 | V | D | V | R | I | L | L | L | V | W | L | -910.236 |
| '0101010102030104040102 | V | D | I | R | F | L | L | L | L | W | E | -910.234 |
| '0101010403030101040108 | V | D | I | Q | I | L | L | V | L | W | N | -910.234 |
| '0101020302020101040101 | V | D | L | K | F | I | L | V | L | W | H | -910.234 |
| '0101040103030103010104 | V | D | V | R | I | L | L | I | V | W | I | -910.228 |
| '0101040105030103050101 | V | D | V | R | V | L | L | I | M | W | H | -910.227 |
| '0101010105010104030105 | V | D | I | R | V | V | L | L | I | W | K | -910.227 |
| '0101020102010103020110 | V | D | L | R | F | V | L | I | A | W | R | -910.227 |
| '0101010202040101050105 | V | D | I | H | F | M | L | V | M | W | K | -910.225 |
| '0201040104010105010104 | I | D | V | R | M | V | L | M | V | W | I | -910.224 |
| '0101010302020201010106 | V | D | I | K | F | I | A | V | V | W | L | -910.22  |
| '0101010102010101020106 | V | D | I | R | F | V | L | V | A | W | L | -910.218 |
| '0101030102010301040104 | V | D | M | R | F | V | V | V | L | W | I | -910.216 |
| '0201030105010101010101 | I | D | M | R | V | V | L | V | V | W | H | -910.215 |
| '0201010302010103010109 | I | D | I | K | F | V | L | I | V | W | Q | -910.214 |
| '0201040102040101070101 | I | D | V | R | F | M | L | V | T | W | H | -910.206 |
| '0101040202010101020103 | V | D | V | H | F | V | L | V | A | W | F | -910.205 |
| '0101040102010301010105 | V | D | V | R | F | V | V | V | V | W | K | -910.203 |
| '0101040102010101050108 | V | D | V | R | F | V | L | V | M | W | N | -910.199 |
| '0101010302020103030101 | V | D | I | K | F | I | L | I | I | W | H | -910.196 |

|                         |   |   |   |   |   |   |   |   |   |   |   |          |
|-------------------------|---|---|---|---|---|---|---|---|---|---|---|----------|
| '0101010105010101030108 | V | D | I | R | V | V | L | V | I | W | N | -910.195 |
| '0101040203030401010101 | V | D | V | H | I | L | W | V | V | W | H | -910.193 |
| '0101030405040101010104 | V | D | M | Q | V | M | L | V | V | W | I | -910.185 |
| '0101010203020401010106 | V | D | I | H | I | I | W | V | V | W | L | -910.182 |
| '0101030303020101040101 | V | D | M | K | I | I | L | V | L | W | H | -910.179 |
| '0101040102010104030110 | V | D | V | R | F | V | L | L | I | W | R | -910.176 |
| '0101010103010103020108 | V | D | I | R | I | V | L | I | A | W | N | -910.172 |
| '0101010203030201020101 | V | D | I | H | I | L | A | V | A | W | H | -910.17  |
| '0101040205010104010108 | V | D | V | H | V | V | L | L | V | W | N | -910.168 |
| '0101030103010104070112 | V | D | M | R | I | V | L | L | T | W | V | -910.163 |
| '0101040202010105010101 | V | D | V | H | F | V | L | M | V | W | H | -910.161 |
| '0201010103030101070106 | I | D | I | R | I | L | L | V | T | W | L | -910.161 |
| '0101020402030101010106 | V | D | L | Q | F | L | L | V | V | W | L | -910.16  |
| '0101010203010105020105 | V | D | I | H | I | V | L | M | A | W | K | -910.157 |
| '0101030405010101040101 | V | D | M | Q | V | V | L | V | L | W | H | -910.154 |
| '0101010305010101030112 | V | D | I | K | V | V | L | V | I | W | V | -910.15  |
| '0101010105010201040102 | V | D | I | R | V | V | A | V | L | W | E | -910.144 |
| '0101040102010103060102 | V | D | V | R | F | V | L | I | S | W | E | -910.136 |
| '0101040105020101030112 | V | D | V | R | V | I | L | V | I | W | V | -910.134 |
| '0101010202030401010101 | V | D | I | H | F | L | W | V | V | W | H | -910.134 |
| '0101010202010403010108 | V | D | I | H | F | V | W | I | V | W | N | -910.131 |
| '0101010204030103040101 | V | D | I | H | M | L | L | I | L | W | H | -910.13  |
| '0101030103030101070104 | V | D | M | R | I | L | L | V | T | W | I | -910.121 |
| '0301040105010101010112 | L | D | V | R | V | V | L | V | V | W | V | -910.115 |
| '0101010102040201070106 | V | D | I | R | F | M | A | V | T | W | L | -910.113 |
| '0101030103010103050101 | V | D | M | R | I | V | L | I | M | W | H | -910.109 |
| '0101010103020104040101 | V | D | I | R | I | I | L | L | L | W | H | -910.107 |
| '0201030105020101070101 | I | D | M | R | V | I | L | V | T | W | H | -910.105 |
| '0101010102010201020111 | V | D | I | R | F | V | A | V | A | W | T | -910.105 |
| '0101030203020301010101 | V | D | M | H | I | I | V | V | V | W | H | -910.103 |
| '0301040102010104010108 | L | D | V | R | F | V | L | L | V | W | N | -910.103 |
| '0101040105020105010105 | V | D | V | R | V | I | L | M | V | W | K | -910.097 |
| '0101010103030301040112 | V | D | I | R | I | L | V | V | L | W | V | -910.094 |
| '0101020103030101010108 | V | D | L | R | I | L | L | V | V | W | N | -910.088 |
| '0101030203010101040111 | V | D | M | H | I | V | L | V | L | W | T | -910.085 |
| '0101010103020401010112 | V | D | I | R | I | I | W | V | V | W | V | -910.085 |
| '0101040302010103060101 | V | D | V | K | F | V | L | I | S | W | H | -910.081 |

|                         |   |   |   |   |   |   |   |   |   |   |   |          |
|-------------------------|---|---|---|---|---|---|---|---|---|---|---|----------|
| '0101030105010201040112 | V | D | M | R | V | V | A | V | L | W | V | -910.081 |
| '0101010302030103040101 | V | D | I | K | F | L | L | I | L | W | H | -910.077 |
| '0101020202040101010112 | V | D | L | H | F | M | L | V | V | W | V | -910.076 |
| '0201010402010103010112 | I | D | I | Q | F | V | L | I | V | W | V | -910.076 |
| '0101020102020201010109 | V | D | L | R | F | I | A | V | V | W | Q | -910.074 |
| '0201030105010103010102 | I | D | M | R | V | V | L | I | V | W | E | -910.073 |
| '0101010103010104040104 | V | D | I | R | I | V | L | L | L | W | I | -910.071 |
| '0201040104020105010101 | I | D | V | R | M | I | L | M | V | W | H | -910.071 |
| '0201010402040101010105 | I | D | I | Q | F | M | L | V | V | W | K | -910.063 |
| '0101040105030101060105 | V | D | V | R | V | L | L | V | S | W | K | -910.06  |
| '0101030103020401010108 | V | D | M | R | I | I | W | V | V | W | N | -910.05  |
| '0101020302020103010101 | V | D | L | K | F | I | L | I | V | W | H | -910.049 |
| '0201040105010103010109 | I | D | V | R | V | V | L | I | V | W | Q | -910.046 |
| '0201040105040101020101 | I | D | V | R | V | M | L | V | A | W | H | -910.046 |
| '0201040103010101040105 | I | D | V | R | I | V | L | V | L | W | K | -910.045 |
| '0201010102020101010107 | I | D | I | R | F | I | L | V | V | W | M | -910.044 |
| '0101010102010204040110 | V | D | I | R | F | V | A | L | L | W | R | -910.042 |
| '0101030405020101050101 | V | D | M | Q | V | I | L | V | M | W | H | -910.04  |
| '0101040304020101020101 | V | D | V | K | M | I | L | V | A | W | H | -910.04  |
| '0101010105010105040106 | V | D | I | R | V | V | L | M | L | W | L | -910.039 |
| '0101030102010303010112 | V | D | M | R | F | V | V | I | V | W | V | -910.03  |
| '0101010202010104070107 | V | D | I | H | F | V | L | L | T | W | M | -910.022 |
| '0101010102020301020109 | V | D | I | R | F | I | V | V | A | W | Q | -910.021 |
| '0101010202030301040101 | V | D | I | H | F | L | V | V | L | W | H | -910.018 |
| '0101040403010101040106 | V | D | V | Q | I | V | L | V | L | W | L | -910.011 |
| '0101010102020201020106 | V | D | I | R | F | I | A | V | A | W | L | -910.009 |
| '0101030103030201010104 | V | D | M | R | I | L | A | V | V | W | I | -909.999 |
| '0101010302010103010103 | V | D | I | K | F | V | L | I | V | W | F | -909.998 |
| '0101010202020401010105 | V | D | I | H | F | I | W | V | V | W | K | -909.997 |
| '0101040102020102010106 | V | D | V | R | F | I | L | A | V | W | L | -909.996 |
| '0301030102020101070101 | L | D | M | R | F | I | L | V | T | W | H | -909.986 |
| '0301020105020103010101 | L | D | L | R | V | I | L | I | V | W | H | -909.985 |
| '0101010402020104010101 | V | D | I | Q | F | I | L | L | V | W | H | -909.975 |
| '0101030102020301010104 | V | D | M | R | F | I | V | V | V | W | I | -909.974 |
| '0101010402030101010110 | V | D | I | Q | F | L | L | V | V | W | R | -909.973 |
| '0101010303040101040108 | V | D | I | K | I | M | L | V | L | W | N | -909.971 |
| '0101010102040301040106 | V | D | I | R | F | M | V | V | L | W | L | -909.968 |

|                         |   |   |   |   |   |   |   |   |   |   |   |          |
|-------------------------|---|---|---|---|---|---|---|---|---|---|---|----------|
| '0101010202040201010106 | V | D | I | H | F | M | A | V | V | W | L | -909.967 |
| '0101010102020301010112 | V | D | I | R | F | I | V | V | V | W | V | -909.966 |
| '0301040102020104010101 | L | D | V | R | F | I | L | L | V | W | H | -909.965 |
| '0101010103020301070104 | V | D | I | R | I | I | V | V | T | W | I | -909.964 |
| '0101010105030301070105 | V | D | I | R | V | L | V | V | T | W | K | -909.963 |
| '0101010203030101070105 | V | D | I | H | I | L | L | V | T | W | K | -909.962 |
| '0101010105010204010106 | V | D | I | R | V | V | A | L | V | W | L | -909.957 |
| '0201010105010103030112 | I | D | I | R | V | V | L | I | I | W | V | -909.956 |
| '0101040202010101070106 | V | D | V | H | F | V | L | V | T | W | L | -909.955 |
| '0201010102010105020101 | I | D | I | R | F | V | L | M | A | W | H | -909.954 |
| '0101030105030101020103 | V | D | M | R | V | L | L | V | A | W | F | -909.951 |
| '0101030102030201010107 | V | D | M | R | F | L | A | V | V | W | M | -909.951 |
| '0101040202010403010101 | V | D | V | H | F | V | W | I | V | W | H | -909.948 |
| '0101010103030301020105 | V | D | I | R | I | L | V | V | A | W | K | -909.946 |
| '0101040105010204010104 | V | D | V | R | V | V | A | L | V | W | I | -909.937 |
| '0201030103020101040101 | I | D | M | R | I | I | L | V | L | W | H | -909.937 |
| '0101040203010101010102 | V | D | V | H | I | V | L | V | V | W | E | -909.935 |
| '0301040103010104010101 | L | D | V | R | I | V | L | L | V | W | H | -909.933 |
| '0301010105010101040105 | L | D | I | R | V | V | L | V | L | W | K | -909.927 |
| '0101040104020101040104 | V | D | V | R | M | I | L | V | L | W | I | -909.92  |
| '0101010102030201020107 | V | D | I | R | F | L | A | V | A | W | M | -909.919 |
| '0201010405030101010109 | I | D | I | Q | V | L | L | V | V | W | Q | -909.915 |
| '0101040105040101010112 | V | D | V | R | V | M | L | V | V | W | V | -909.913 |
| '0101030201030101030101 | V | D | M | H | L | L | L | V | I | W | H | -909.912 |
| '0201010202010105010106 | I | D | I | H | F | V | L | M | V | W | L | -909.912 |
| '0301040102010101020106 | L | D | V | R | F | V | L | V | A | W | L | -909.909 |
| '0101030105030101010106 | V | D | M | R | V | L | L | V | V | W | L | -909.908 |
| '0101010102010103070110 | V | D | I | R | F | V | L | I | T | W | R | -909.9   |
| '0101040105020204010101 | V | D | V | R | V | I | A | L | V | W | H | -909.899 |
| '0101010102010203050105 | V | D | I | R | F | V | A | I | M | W | K | -909.899 |
| '0101030102010104020112 | V | D | M | R | F | V | L | L | A | W | V | -909.897 |
| '0101040205010103070101 | V | D | V | H | V | V | L | I | T | W | H | -909.89  |
| '0101010402010104070112 | V | D | I | Q | F | V | L | L | T | W | V | -909.889 |
| '0101040203040101010105 | V | D | V | H | I | M | L | V | V | W | K | -909.884 |
| '0101040303010103040101 | V | D | V | K | I | V | L | I | L | W | H | -909.884 |
| '0201010103030301010112 | I | D | I | R | I | L | V | V | V | W | V | -909.884 |
| '0101030105010101020102 | V | D | M | R | V | V | L | V | A | W | E | -909.884 |

|                         |   |   |   |   |   |   |   |   |   |   |   |          |
|-------------------------|---|---|---|---|---|---|---|---|---|---|---|----------|
| '0101010102030401020108 | V | D | I | R | F | L | W | V | A | W | N | -909.882 |
| '0101030205040101020101 | V | D | M | H | V | M | L | V | A | W | H | -909.881 |
| '0101030302010101020105 | V | D | M | K | F | V | L | V | A | W | K | -909.878 |
| '0101040105020101050109 | V | D | V | R | V | I | L | V | M | W | Q | -909.876 |
| '0101010202010104060106 | V | D | I | H | F | V | L | L | S | W | L | -909.869 |
| '0101010205010403010105 | V | D | I | H | V | V | W | I | V | W | K | -909.867 |
| '0101020202010101070109 | V | D | L | H | F | V | L | V | T | W | Q | -909.866 |
| '0101040102020101040103 | V | D | V | R | F | I | L | V | L | W | F | -909.866 |
| '0101040105010101060108 | V | D | V | R | V | V | L | V | S | W | N | -909.854 |
| '0101020102030103010106 | V | D | L | R | F | L | L | I | V | W | L | -909.852 |
| '0101040103030101070101 | V | D | V | R | I | L | L | V | T | W | H | -909.851 |
| '0201010102010103030108 | I | D | I | R | F | V | L | I | I | W | N | -909.85  |
| '0101010202040301010105 | V | D | I | H | F | M | V | V | V | W | K | -909.85  |
| '0101040102030401010109 | V | D | V | R | F | L | W | V | V | W | Q | -909.845 |
| '0101010205020301010104 | V | D | I | H | V | I | V | V | V | W | I | -909.844 |
| '0101010102010104030109 | V | D | I | R | F | V | L | L | I | W | Q | -909.844 |
| '0101030103020101050101 | V | D | M | R | I | I | L | V | M | W | H | -909.842 |
| '0101020202010101030105 | V | D | L | H | F | V | L | V | I | W | K | -909.834 |
| '0101010205040201070101 | V | D | I | H | V | M | A | V | T | W | H | -909.832 |
| '0101010102040201040108 | V | D | I | R | F | M | A | V | L | W | N | -909.832 |
| '0201030102010103040101 | I | D | M | R | F | V | L | I | L | W | H | -909.831 |
| '0101040101030103040112 | V | D | V | R | L | L | L | I | L | W | V | -909.831 |
| '0301030105010101040104 | L | D | M | R | V | V | L | V | L | W | I | -909.83  |
| '0201010102030303010101 | I | D | I | R | F | L | V | I | V | W | H | -909.828 |
| '0301010105040101040106 | L | D | I | R | V | M | L | V | L | W | L | -909.828 |
| '0201010102020201040101 | I | D | I | R | F | I | A | V | L | W | H | -909.827 |
| '0101030101020101010106 | V | D | M | R | L | I | L | V | V | W | L | -909.826 |
| '0101010205010203010106 | V | D | I | H | V | V | A | I | V | W | L | -909.822 |
| '0101010204030101020104 | V | D | I | H | M | L | L | V | A | W | I | -909.819 |
| '0101040102010104050112 | V | D | V | R | F | V | L | L | M | W | V | -909.818 |
| '0101010102040101030108 | V | D | I | R | F | M | L | V | I | W | N | -909.814 |
| '0101030102040101050108 | V | D | M | R | F | M | L | V | M | W | N | -909.812 |
| '0101010102040103070106 | V | D | I | R | F | M | L | I | T | W | L | -909.808 |
| '0201010305010103010112 | I | D | I | K | V | V | L | I | V | W | V | -909.806 |
| '0101030305030101040101 | V | D | M | K | V | L | L | V | L | W | H | -909.805 |
| '0101010402030101030103 | V | D | I | Q | F | L | L | V | I | W | F | -909.803 |
| '0101010105020401020101 | V | D | I | R | V | I | W | V | A | W | H | -909.8   |



|                         |   |   |   |   |   |   |   |   |   |   |   |          |
|-------------------------|---|---|---|---|---|---|---|---|---|---|---|----------|
| '0201010105020103010101 | I | D | I | R | V | I | L | I | V | W | H | -909.8   |
| '0101020103030101020112 | V | D | L | R | I | L | L | V | A | W | V | -909.796 |
| '0201030104030103010101 | I | D | M | R | M | L | L | I | V | W | H | -909.787 |
| '0201030102010101010112 | I | D | M | R | F | V | L | V | V | W | V | -909.786 |
| '0101040203010101030106 | V | D | V | H | I | V | L | V | I | W | L | -909.785 |
| '0101030202010101020104 | V | D | M | H | F | V | L | V | A | W | I | -909.784 |
| '0201010105020101030104 | I | D | I | R | V | I | L | V | I | W | I | -909.776 |
| '0101030102020102040101 | V | D | M | R | F | I | L | A | L | W | H | -909.775 |
| '0201010103030101010108 | I | D | I | R | I | L | L | V | V | W | N | -909.773 |
| '0101020102010101070111 | V | D | L | R | F | V | L | V | T | W | T | -909.771 |
| '0101030202010201020101 | V | D | M | H | F | V | A | V | A | W | H | -909.77  |
| '0101040105010104030106 | V | D | V | R | V | V | L | L | I | W | L | -909.769 |
| '0101010402010101070108 | V | D | I | Q | F | V | L | V | T | W | N | -909.768 |
| '0101030405010104010104 | V | D | M | Q | V | V | L | L | V | W | I | -909.767 |
| '0101040103010101020101 | V | D | V | R | I | V | L | V | A | W | H | -909.766 |
| '0101030104010103040101 | V | D | M | R | M | V | L | I | L | W | H | -909.765 |
| '0101030201040101040105 | V | D | M | H | L | M | L | V | L | W | K | -909.764 |
| '0101030303010103010105 | V | D | M | K | I | V | L | I | V | W | K | -909.762 |
| '0101040103010201040101 | V | D | V | R | I | V | A | V | L | W | H | -909.758 |
| '0101040105010105040105 | V | D | V | R | V | V | L | M | L | W | K | -909.758 |
| '0101040101010103040106 | V | D | V | R | L | V | L | I | L | W | L | -909.757 |
| '0101010105020204010110 | V | D | I | R | V | I | A | L | V | W | R | -909.756 |
| '0101040101030201040107 | V | D | V | R | L | L | A | V | L | W | M | -909.755 |
| '0101010403020101020105 | V | D | I | Q | I | I | L | V | A | W | K | -909.75  |
| '0101010302030101030112 | V | D | I | K | F | L | L | V | I | W | V | -909.744 |
| '0101040103010103010102 | V | D | V | R | I | V | L | I | V | W | E | -909.741 |
| '0101010102020201060105 | V | D | I | R | F | I | A | V | S | W | K | -909.74  |
| '0201010204040101010109 | I | D | I | H | M | M | L | V | V | W | Q | -909.736 |
| '0101030103010101010108 | V | D | M | R | I | V | L | V | V | W | N | -909.735 |
| '0101040201030201040101 | V | D | V | H | L | L | A | V | L | W | H | -909.729 |
| '0101010103010103040102 | V | D | I | R | I | V | L | I | L | W | E | -909.727 |
| '0101010203020403010101 | V | D | I | H | I | I | W | I | V | W | H | -909.724 |
| '0101010402020201010104 | V | D | I | Q | F | I | A | V | V | W | I | -909.719 |
| '0101010102030203060101 | V | D | I | R | F | L | A | I | S | W | H | -909.716 |
| '0201030405020101010101 | I | D | M | Q | V | I | L | V | V | W | H | -909.715 |
| '0201040103020101050101 | I | D | V | R | I | I | L | V | M | W | H | -909.71  |
| '0101040205010104040101 | V | D | V | H | V | V | L | L | L | W | H | -909.707 |

|                         |   |   |   |   |   |   |   |   |   |   |   |          |
|-------------------------|---|---|---|---|---|---|---|---|---|---|---|----------|
| '0101040102010105040108 | V | D | V | R | F | V | L | M | L | W | N | -909.707 |
| '0101020103020101020109 | V | D | L | R | I | I | L | V | A | W | Q | -909.707 |
| '0101030102010103050103 | V | D | M | R | F | V | L | I | M | W | F | -909.706 |
| '0101030305010101040104 | V | D | M | K | V | V | L | V | L | W | I | -909.704 |
| '0101020303020101010101 | V | D | L | K | I | I | L | V | V | W | H | -909.7   |
| '0101010105020102030105 | V | D | I | R | V | I | L | A | I | W | K | -909.699 |
| '0201020102030101070101 | I | D | L | R | F | L | L | V | T | W | H | -909.698 |
| '0201010102010102040106 | I | D | I | R | F | V | L | A | L | W | L | -909.696 |
| '0101030201030201010106 | V | D | M | H | L | L | A | V | V | W | L | -909.695 |
| '0201010105010101010111 | I | D | I | R | V | V | L | V | V | W | T | -909.694 |
| '0101010305020102010104 | V | D | I | K | V | I | L | A | V | W | I | -909.692 |
| '0101030203010103020101 | V | D | M | H | I | V | L | I | A | W | H | -909.69  |
| '0101040103020104010112 | V | D | V | R | I | I | L | L | V | W | V | -909.69  |
| '0101010102020403020101 | V | D | I | R | F | I | W | I | A | W | H | -909.687 |
| '0101010105030201040108 | V | D | I | R | V | L | A | V | L | W | N | -909.685 |
| '0101030102010201070104 | V | D | M | R | F | V | A | V | T | W | I | -909.685 |
| '0101040405020101070101 | V | D | V | Q | V | I | L | V | T | W | H | -909.677 |
| '0101010102040301010101 | V | D | I | R | F | M | V | V | V | W | H | -909.675 |
| '0301010105040101020104 | L | D | I | R | V | M | L | V | A | W | I | -909.671 |
| '0101030301020101010104 | V | D | M | K | L | I | L | V | V | W | I | -909.67  |
| '0101040102030102040101 | V | D | V | R | F | L | L | A | L | W | H | -909.67  |
| '0301010105020101010108 | L | D | I | R | V | I | L | V | V | W | N | -909.666 |
| '0101020302040101010104 | V | D | L | K | F | M | L | V | V | W | I | -909.662 |
| '0101040103010103070101 | V | D | V | R | I | V | L | I | T | W | H | -909.662 |
| '0201020102010103010106 | I | D | L | R | F | V | L | I | V | W | L | -909.662 |
| '0101010205010104020105 | V | D | I | H | V | V | L | L | A | W | K | -909.66  |
| '0101030102010204010105 | V | D | M | R | F | V | A | L | V | W | K | -909.659 |
| '0101040104020104070101 | V | D | V | R | M | I | L | L | T | W | H | -909.659 |
| '0101030201010103040106 | V | D | M | H | L | V | L | I | L | W | L | -909.651 |
| '0101030101030101040109 | V | D | M | R | L | L | L | V | L | W | Q | -909.646 |
| '0301010105010104070104 | L | D | I | R | V | V | L | L | T | W | I | -909.644 |
| '0101010105020201070102 | V | D | I | R | V | I | A | V | T | W | E | -909.642 |
| '0201010104030103010106 | I | D | I | R | M | L | L | I | V | W | L | -909.641 |
| '0201030101030101040104 | I | D | M | R | L | L | L | V | L | W | I | -909.64  |
| '0101010104020101050104 | V | D | I | R | M | I | L | V | M | W | I | -909.638 |
| '0101030102010201040106 | V | D | M | R | F | V | A | V | L | W | L | -909.638 |
| '0101010104010103010105 | V | D | I | R | M | V | L | I | V | W | K | -909.637 |

|                         |   |   |   |   |   |   |   |   |   |   |   |          |
|-------------------------|---|---|---|---|---|---|---|---|---|---|---|----------|
| '0101040105010103050103 | V | D | V | R | V | V | L | I | M | W | F | -909.634 |
| '0101010402020101060106 | V | D | I | Q | F | I | L | V | S | W | L | -909.628 |
| '0101010202020201010109 | V | D | I | H | F | I | A | V | V | W | Q | -909.628 |
| '0101010202010102010112 | V | D | I | H | F | V | L | A | V | W | V | -909.626 |
| '0201040102010101070109 | I | D | V | R | F | V | L | V | T | W | Q | -909.626 |
| '0101010402010104020109 | V | D | I | Q | F | V | L | L | A | W | Q | -909.622 |
| '0101030103030101060107 | V | D | M | R | I | L | L | V | S | W | M | -909.622 |
| '0201010105020301010106 | I | D | I | R | V | I | V | V | V | W | L | -909.622 |
| '0101010304010105010104 | V | D | I | K | M | V | L | M | V | W | I | -909.621 |
| '0101030103020101060111 | V | D | M | R | I | I | L | V | S | W | T | -909.621 |
| '0101010103020104010106 | V | D | I | R | I | I | L | L | V | W | L | -909.621 |
| '0101040104030101040111 | V | D | V | R | M | L | L | V | L | W | T | -909.62  |
| '0201030104030101010104 | I | D | M | R | M | L | L | V | V | W | I | -909.616 |
| '0101030105010104070102 | V | D | M | R | V | V | L | L | T | W | E | -909.609 |
| '0101040104020103010108 | V | D | V | R | M | I | L | I | V | W | N | -909.594 |
| '0101040105030104070101 | V | D | V | R | V | L | L | L | T | W | H | -909.575 |
| '0101040105010101050102 | V | D | V | R | V | V | L | V | M | W | E | -909.574 |
| '0101040103010104070110 | V | D | V | R | I | V | L | L | T | W | R | -909.574 |
| '0101020102010104010105 | V | D | L | R | F | V | L | L | V | W | K | -909.573 |
| '0101010202020201070101 | V | D | I | H | F | I | A | V | T | W | H | -909.573 |
| '0101040305010101050105 | V | D | V | K | V | V | L | V | M | W | K | -909.571 |
| '0201010303030101010110 | I | D | I | K | I | L | L | V | V | W | R | -909.569 |
| '0201040102010101040108 | I | D | V | R | F | V | L | V | L | W | N | -909.567 |
| '0101010103010103050103 | V | D | I | R | I | V | L | I | M | W | F | -909.566 |
| '0201040102010102040101 | I | D | V | R | F | V | L | A | L | W | H | -909.564 |
| '0101010304010103060104 | V | D | I | K | M | V | L | I | S | W | I | -909.56  |
| '0101030103010101030106 | V | D | M | R | I | V | L | V | I | W | L | -909.56  |
| '0101020104010103010110 | V | D | L | R | M | V | L | I | V | W | R | -909.559 |
| '0301010205020101040101 | L | D | I | H | V | I | L | V | L | W | H | -909.559 |
| '0101010105020401010108 | V | D | I | R | V | I | W | V | V | W | N | -909.558 |
| '0101040102020102020101 | V | D | V | R | F | I | L | A | A | W | H | -909.558 |
| '0101010304040101070101 | V | D | I | K | M | M | L | V | T | W | H | -909.556 |
| '0101010201010104010104 | V | D | I | H | L | V | L | L | V | W | I | -909.551 |
| '0101010203020104070101 | V | D | I | H | I | I | L | L | T | W | H | -909.546 |
| '0101010203020101050101 | V | D | I | H | I | I | L | V | M | W | H | -909.541 |
| '0101010102010105040107 | V | D | I | R | F | V | L | M | L | W | M | -909.538 |
| '0101010105020101010104 | V | D | I | R | V | I | L | V | V | W | I | -909.536 |

|                         |   |   |   |   |   |   |   |   |   |   |   |          |
|-------------------------|---|---|---|---|---|---|---|---|---|---|---|----------|
| '0101010305010103030103 | V | D | I | K | V | V | L | I | I | W | F | -909.534 |
| '0101040105010104050101 | V | D | V | R | V | V | L | L | M | W | H | -909.53  |
| '0101030102010105010104 | V | D | M | R | F | V | L | M | V | W | I | -909.53  |
| '0101010302010101040102 | V | D | I | K | F | V | L | V | L | W | E | -909.528 |
| '0101010104040201040106 | V | D | I | R | M | M | A | V | L | W | L | -909.527 |
| '0101040103030401010108 | V | D | V | R | I | L | W | V | V | W | N | -909.525 |
| '0101040103010201030105 | V | D | V | R | I | V | A | V | I | W | K | -909.521 |
| '0101030203010101030104 | V | D | M | H | I | V | L | V | I | W | I | -909.521 |
| '0101010105040201040101 | V | D | I | R | V | M | A | V | L | W | H | -909.515 |
| '0101010405010101040110 | V | D | I | Q | V | V | L | V | L | W | R | -909.513 |
| '0101010102010403010110 | V | D | I | R | F | V | W | I | V | W | R | -909.512 |
| '0101010402010104010110 | V | D | I | Q | F | V | L | L | V | W | R | -909.512 |
| '0101030405010101070110 | V | D | M | Q | V | V | L | V | T | W | R | -909.504 |
| '0101010302010104040104 | V | D | I | K | F | V | L | L | L | W | I | -909.503 |
| '0101010305030104010104 | V | D | I | K | V | L | L | L | V | W | I | -909.5   |
| '0301010305020101010106 | L | D | I | K | V | I | L | V | V | W | L | -909.499 |
| '0101010302030401010104 | V | D | I | K | F | L | W | V | V | W | I | -909.499 |
| '0201010302010101040105 | I | D | I | K | F | V | L | V | L | W | K | -909.499 |
| '0101010103020102050101 | V | D | I | R | I | I | L | A | M | W | H | -909.499 |
| '0101010203030104010108 | V | D | I | H | I | L | L | L | V | W | N | -909.499 |
| '0101010105010201030110 | V | D | I | R | V | V | A | V | I | W | R | -909.496 |
| '0201010105010201020104 | I | D | I | R | V | V | A | V | A | W | I | -909.489 |
| '0101010103040101070106 | V | D | I | R | I | M | L | V | T | W | L | -909.489 |
| '0201040105030301010101 | I | D | V | R | V | L | V | V | V | W | H | -909.486 |
| '0101040101030101040105 | V | D | V | R | L | L | L | V | L | W | K | -909.486 |
| '0101020103030101040110 | V | D | L | R | I | L | L | V | L | W | R | -909.485 |
| '0201010105010101070104 | I | D | I | R | V | V | L | V | T | W | I | -909.485 |
| '0101020105010101070110 | V | D | L | R | V | V | L | V | T | W | R | -909.484 |
| '0301030103010101040110 | L | D | M | R | I | V | L | V | L | W | R | -909.481 |
| '0101010402030101070109 | V | D | I | Q | F | L | L | V | T | W | Q | -909.476 |
| '0101010104020103040108 | V | D | I | R | M | I | L | I | L | W | N | -909.475 |
| '0201010102030103020101 | I | D | I | R | F | L | L | I | A | W | H | -909.472 |
| '0301010103020101050101 | L | D | I | R | I | I | L | V | M | W | H | -909.471 |
| '0101030201030201070101 | V | D | M | H | L | L | A | V | T | W | H | -909.468 |
| '0101010302010103040110 | V | D | I | K | F | V | L | I | L | W | R | -909.466 |
| '0101010102030401070104 | V | D | I | R | F | L | W | V | T | W | I | -909.464 |
| '0101030401030101040105 | V | D | M | Q | L | L | L | V | L | W | K | -909.462 |

|                         |   |   |   |   |   |   |   |   |   |   |   |          |
|-------------------------|---|---|---|---|---|---|---|---|---|---|---|----------|
| '0101010202010104030104 | V | D | I | H | F | V | L | L | I | W | I | -909.46  |
| '0101010304010104010111 | V | D | I | K | M | V | L | L | V | W | T | -909.458 |
| '0101040402020101010105 | V | D | V | Q | F | I | L | V | V | W | K | -909.458 |
| '0101010102030301060111 | V | D | I | R | F | L | V | V | S | W | T | -909.452 |
| '0101040302010104010101 | V | D | V | K | F | V | L | L | V | W | H | -909.451 |
| '0201010102030101020112 | I | D | I | R | F | L | L | V | A | W | V | -909.445 |
| '0101010403010101040101 | V | D | I | Q | I | V | L | V | L | W | H | -909.445 |
| '0301010102010102040104 | L | D | I | R | F | V | L | A | L | W | I | -909.445 |
| '0101020102010203010106 | V | D | L | R | F | V | A | I | V | W | L | -909.444 |
| '0101030105010104030108 | V | D | M | R | V | V | L | L | I | W | N | -909.441 |
| '0101040204010103010110 | V | D | V | H | M | V | L | I | V | W | R | -909.441 |
| '0101010205010105010112 | V | D | I | H | V | V | L | M | V | W | V | -909.441 |
| '0101010102010403020105 | V | D | I | R | F | V | W | I | A | W | K | -909.441 |
| '0101030104020101030105 | V | D | M | R | M | I | L | V | I | W | K | -909.44  |
| '0101040102010105070110 | V | D | V | R | F | V | L | M | T | W | R | -909.439 |
| '0101040103010404010104 | V | D | V | R | I | V | W | L | V | W | I | -909.438 |
| '0201010102010103070105 | I | D | I | R | F | V | L | I | T | W | K | -909.43  |
| '0101010103020103020105 | V | D | I | R | I | I | L | I | A | W | K | -909.428 |
| '0201030103040101010104 | I | D | M | R | I | M | L | V | V | W | I | -909.427 |
| '0101030403010101040112 | V | D | M | Q | I | V | L | V | L | W | V | -909.423 |
| '0101030103010104020101 | V | D | M | R | I | V | L | L | A | W | H | -909.422 |
| '0101010102020301070111 | V | D | I | R | F | I | V | V | T | W | T | -909.421 |
| '0101020105020101020112 | V | D | L | R | V | I | L | V | A | W | V | -909.421 |
| '0101040201010104040110 | V | D | V | H | L | V | L | L | L | W | R | -909.421 |
| '0101010303030101040107 | V | D | I | K | I | L | L | V | L | W | M | -909.419 |
| '0101010402010403010106 | V | D | I | Q | F | V | W | I | V | W | L | -909.417 |
| '0101010202010203050101 | V | D | I | H | F | V | A | I | M | W | H | -909.412 |
| '0101010105030104060104 | V | D | I | R | V | L | L | L | S | W | I | -909.411 |
| '0101010302030101040108 | V | D | I | K | F | L | L | V | L | W | N | -909.41  |
| '0201010102010105040110 | I | D | I | R | F | V | L | M | L | W | R | -909.41  |
| '0101020104010103040104 | V | D | L | R | M | V | L | I | L | W | I | -909.407 |
| '0101020203030101010101 | V | D | L | H | I | L | L | V | V | W | H | -909.4   |
| '0101010105010103010110 | V | D | I | R | V | V | L | I | V | W | R | -909.399 |
| '0101020103020201010105 | V | D | L | R | I | I | A | V | V | W | K | -909.398 |
| '0101010402010103020105 | V | D | I | Q | F | V | L | I | A | W | K | -909.395 |
| '0201030302010103010101 | I | D | M | K | F | V | L | I | V | W | H | -909.395 |
| '0101010105020301040106 | V | D | I | R | V | I | V | V | L | W | L | -909.395 |

|                         |   |   |   |   |   |   |   |   |   |   |   |          |
|-------------------------|---|---|---|---|---|---|---|---|---|---|---|----------|
| '0101040303020101010102 | V | D | V | K | I | I | L | V | V | W | E | -909.395 |
| '0301040105010104010104 | L | D | V | R | V | V | L | L | V | W | I | -909.392 |
| '0301010102010104020106 | L | D | I | R | F | V | L | L | A | W | L | -909.388 |
| '0101040402010103010109 | V | D | V | Q | F | V | L | I | V | W | Q | -909.388 |
| '0101030101020101030112 | V | D | M | R | L | I | L | V | I | W | V | -909.387 |
| '0101020205010101070112 | V | D | L | H | V | V | L | V | T | W | V | -909.387 |
| '0301010102030102010106 | L | D | I | R | F | L | L | A | V | W | L | -909.385 |
| '0101030302010104010106 | V | D | M | K | F | V | L | L | V | W | L | -909.381 |
| '0101010301020101070111 | V | D | I | K | L | I | L | V | T | W | T | -909.379 |
| '0301040102030102010101 | L | D | V | R | F | L | L | A | V | W | H | -909.372 |
| '0101040103010105070102 | V | D | V | R | I | V | L | M | T | W | E | -909.371 |
| '0101040105040101070106 | V | D | V | R | V | M | L | V | T | W | L | -909.366 |
| '0101030201020201040101 | V | D | M | H | L | I | A | V | L | W | H | -909.365 |
| '0201010102010103050110 | I | D | I | R | F | V | L | I | M | W | R | -909.362 |
| '0301020105020101010110 | L | D | L | R | V | I | L | V | V | W | R | -909.359 |
| '0201010302020101040101 | I | D | I | K | F | I | L | V | L | W | H | -909.354 |
| '0101030105020104010110 | V | D | M | R | V | I | L | L | V | W | R | -909.353 |
| '0101010103020401020108 | V | D | I | R | I | I | W | V | A | W | N | -909.352 |
| '0101010203010104070108 | V | D | I | H | I | V | L | L | T | W | N | -909.349 |
| '0101020302010101070106 | V | D | L | K | F | V | L | V | T | W | L | -909.348 |
| '0101010105010403010106 | V | D | I | R | V | V | W | I | V | W | L | -909.348 |
| '0101040204020101040101 | V | D | V | H | M | I | L | V | L | W | H | -909.344 |
| '0201010103010103070101 | I | D | I | R | I | V | L | I | T | W | H | -909.343 |
| '0101040104020101030102 | V | D | V | R | M | I | L | V | I | W | E | -909.342 |
| '0201010103030103010101 | I | D | I | R | I | L | L | I | V | W | H | -909.341 |
| '0101010102020102010102 | V | D | I | R | F | I | L | A | V | W | E | -909.34  |
| '0101010402020301010101 | V | D | I | Q | F | I | V | V | V | W | H | -909.337 |
| '0101010102020301040104 | V | D | I | R | F | I | V | V | L | W | I | -909.336 |
| '0101020204030101010106 | V | D | L | H | M | L | L | V | V | W | L | -909.335 |
| '0101010104010203040104 | V | D | I | R | M | V | A | I | L | W | I | -909.332 |
| '0301030105020101010109 | L | D | M | R | V | I | L | V | V | W | Q | -909.331 |
| '0101010103010403010104 | V | D | I | R | I | V | W | I | V | W | I | -909.327 |
| '0101010202030101060109 | V | D | I | H | F | L | L | V | S | W | Q | -909.327 |
| '0101030203020102010101 | V | D | M | H | I | I | L | A | V | W | H | -909.323 |
| '0301010205010104010108 | L | D | I | H | V | V | L | L | V | W | N | -909.318 |
| '0101020205020101050101 | V | D | L | H | V | I | L | V | M | W | H | -909.314 |
| '0201010305020101010112 | I | D | I | K | V | I | L | V | V | W | V | -909.312 |

|                         |   |   |   |   |   |   |   |   |   |   |   |          |
|-------------------------|---|---|---|---|---|---|---|---|---|---|---|----------|
| '0101040102030102010107 | V | D | V | R | F | L | L | A | V | W | M | -909.308 |
| '0101040202010103020101 | V | D | V | H | F | V | L | I | A | W | H | -909.308 |
| '0101010302010103050106 | V | D | I | K | F | V | L | I | M | W | L | -909.307 |
| '0101010104010104010106 | V | D | I | R | M | V | L | L | V | W | L | -909.303 |
| '0201040102010102010102 | I | D | V | R | F | V | L | A | V | W | E | -909.3   |
| '0101010104010103070101 | V | D | I | R | M | V | L | I | T | W | H | -909.299 |
| '0101040201030101030104 | V | D | V | H | L | L | L | V | I | W | I | -909.298 |
| '0101010303040101050110 | V | D | I | K | I | M | L | V | M | W | R | -909.294 |
| '0101010103030401040106 | V | D | I | R | I | L | W | V | L | W | L | -909.294 |
| '0201010103030102050101 | I | D | I | R | I | L | L | A | M | W | H | -909.289 |
| '0101030205010101020106 | V | D | M | H | V | V | L | V | A | W | L | -909.289 |
| '0101010304010103010106 | V | D | I | K | M | V | L | I | V | W | L | -909.287 |
| '0301030102010104010112 | L | D | M | R | F | V | L | L | V | W | V | -909.286 |
| '0201010103010101040110 | I | D | I | R | I | V | L | V | L | W | R | -909.285 |
| '0101010403040101050106 | V | D | I | Q | I | M | L | V | M | W | L | -909.282 |
| '0201040103010101010106 | I | D | V | R | I | V | L | V | V | W | L | -909.278 |
| '0101030401020103010105 | V | D | M | Q | L | I | L | I | V | W | K | -909.277 |
| '0201010105010103010108 | I | D | I | R | V | V | L | I | V | W | N | -909.277 |
| '0101010304010104040105 | V | D | I | K | M | V | L | L | L | W | K | -909.271 |
| '0101030102030104010104 | V | D | M | R | F | L | L | L | V | W | I | -909.262 |
| '0101010102020104030112 | V | D | I | R | F | I | L | L | I | W | V | -909.261 |
| '0101020302030101010102 | V | D | L | K | F | L | L | V | V | W | E | -909.261 |
| '0301010105020101030106 | L | D | I | R | V | I | L | V | I | W | L | -909.26  |
| '0201010102040201010106 | I | D | I | R | F | M | A | V | V | W | L | -909.258 |
| '0101020102030101060104 | V | D | L | R | F | L | L | V | S | W | I | -909.254 |
| '0101020201030103010106 | V | D | L | H | L | L | L | I | V | W | L | -909.254 |
| '0101010102030201050104 | V | D | I | R | F | L | A | V | M | W | I | -909.253 |
| '0101030103020401070101 | V | D | M | R | I | I | W | V | T | W | H | -909.252 |
| '0101010103010303010101 | V | D | I | R | I | V | V | I | V | W | H | -909.243 |
| '0101030302010101010102 | V | D | M | K | F | V | L | V | V | W | E | -909.24  |
| '0101010402030201040101 | V | D | I | Q | F | L | A | V | L | W | H | -909.235 |
| '0101040202010101060101 | V | D | V | H | F | V | L | V | S | W | H | -909.234 |
| '0101030403010103010104 | V | D | M | Q | I | V | L | I | V | W | I | -909.232 |
| '0201040102010103050101 | I | D | V | R | F | V | L | I | M | W | H | -909.232 |
| '0201010105030201010112 | I | D | I | R | V | L | A | V | V | W | V | -909.232 |
| '0101040201020101030112 | V | D | V | H | L | I | L | V | I | W | V | -909.227 |
| '0101030104040101010108 | V | D | M | R | M | M | L | V | V | W | N | -909.221 |

|                         |   |   |   |   |   |   |   |   |   |   |   |          |
|-------------------------|---|---|---|---|---|---|---|---|---|---|---|----------|
| '0301010103030102010104 | L | D | I | R | I | L | L | A | V | W | I | -909.218 |
| '0101040201020103010106 | V | D | V | H | L | I | L | I | V | W | L | -909.218 |
| '0101010204010105040104 | V | D | I | H | M | V | L | M | L | W | I | -909.217 |
| '0101010202040102010104 | V | D | I | H | F | M | L | A | V | W | I | -909.212 |
| '0101040303010101030110 | V | D | V | K | I | V | L | V | I | W | R | -909.212 |
| '0201010202020101010103 | I | D | I | H | F | I | L | V | V | W | F | -909.209 |
| '0101010104030104040104 | V | D | I | R | M | L | L | L | L | W | I | -909.208 |
| '0201010103020101030103 | I | D | I | R | I | I | L | V | I | W | F | -909.206 |
| '0101010102020401070102 | V | D | I | R | F | I | W | V | T | W | E | -909.204 |
| '0101030202010101060107 | V | D | M | H | F | V | L | V | S | W | M | -909.197 |
| '0101020402010101010104 | V | D | L | Q | F | V | L | V | V | W | I | -909.195 |
| '0101030101020103030108 | V | D | M | R | L | I | L | I | I | W | N | -909.19  |
| '0101010202040201040101 | V | D | I | H | F | M | A | V | L | W | H | -909.189 |
| '0101010105030103010105 | V | D | I | R | V | L | L | I | V | W | K | -909.188 |
| '0301010103010102040106 | L | D | I | R | I | V | L | A | L | W | L | -909.187 |
| '0101010302020201020101 | V | D | I | K | F | I | A | V | A | W | H | -909.182 |
| '0101030201020101050109 | V | D | M | H | L | I | L | V | M | W | Q | -909.178 |
| '0201010105010105070110 | I | D | I | R | V | V | L | M | T | W | R | -909.171 |
| '0101030304010101040102 | V | D | M | K | M | V | L | V | L | W | E | -909.169 |
| '0101010105030104040105 | V | D | I | R | V | L | L | L | L | W | K | -909.166 |
| '0101020105030101040109 | V | D | L | R | V | L | L | V | L | W | Q | -909.165 |
| '0201040105010101030112 | I | D | V | R | V | V | L | V | I | W | V | -909.164 |
| '0101010202040101030111 | V | D | I | H | F | M | L | V | I | W | T | -909.163 |
| '0101030103010201050110 | V | D | M | R | I | V | A | V | M | W | R | -909.161 |
| '0101030105010103010107 | V | D | M | R | V | V | L | I | V | W | M | -909.16  |
| '0201010405010103070101 | I | D | I | Q | V | V | L | I | T | W | H | -909.158 |
| '0101010105010104050110 | V | D | I | R | V | V | L | L | M | W | R | -909.158 |
| '0301010103010101070105 | L | D | I | R | I | V | L | V | T | W | K | -909.155 |
| '0101020101020101010110 | V | D | L | R | L | I | L | V | V | W | R | -909.149 |
| '0101040105010303010108 | V | D | V | R | V | V | V | I | V | W | N | -909.149 |
| '0301010203010101010104 | L | D | I | H | I | V | L | V | V | W | I | -909.145 |
| '0201010102010105070106 | I | D | I | R | F | V | L | M | T | W | L | -909.14  |
| '0101010102010102020101 | V | D | I | R | F | V | L | A | A | W | H | -909.139 |
| '0201010105030102040101 | I | D | I | R | V | L | L | A | L | W | H | -909.135 |
| '0201010102010303010106 | I | D | I | R | F | V | V | I | V | W | L | -909.135 |
| '0101030102030401010105 | V | D | M | R | F | L | W | V | V | W | K | -909.134 |
| '0201010205020101070101 | I | D | I | H | V | I | L | V | T | W | H | -909.134 |



|                         |   |   |   |   |   |   |   |   |   |   |   |          |
|-------------------------|---|---|---|---|---|---|---|---|---|---|---|----------|
| '0101020102010103070107 | V | D | L | R | F | V | L | I | T | W | M | -909.134 |
| '0101020102010103050102 | V | D | L | R | F | V | L | I | M | W | E | -909.134 |
| '0101010205010101030109 | V | D | I | H | V | V | L | V | I | W | Q | -909.132 |
| '0101010201030101040108 | V | D | I | H | L | L | L | V | L | W | N | -909.13  |
| '0101020203010101010110 | V | D | L | H | I | V | L | V | V | W | R | -909.129 |
| '0101010105020301030105 | V | D | I | R | V | I | V | V | I | W | K | -909.128 |
| '0101010103010104010105 | V | D | I | R | I | V | L | L | V | W | K | -909.126 |
| '0101040103030101010105 | V | D | V | R | I | L | L | V | V | W | K | -909.125 |
| '0101040101020103040102 | V | D | V | R | L | I | L | I | L | W | E | -909.123 |
| '0101020102010104070112 | V | D | L | R | F | V | L | L | T | W | V | -909.122 |
| '0201010203020201010101 | I | D | I | H | I | I | A | V | V | W | H | -909.12  |
| '0101040202010401010105 | V | D | V | H | F | V | W | V | V | W | K | -909.114 |
| '0101010102010303040110 | V | D | I | R | F | V | V | I | L | W | R | -909.111 |
| '0101020205020101010107 | V | D | L | H | V | I | L | V | V | W | M | -909.11  |
| '0101010402010103040111 | V | D | I | Q | F | V | L | I | L | W | T | -909.109 |
| '0101010402040101050110 | V | D | I | Q | F | M | L | V | M | W | R | -909.107 |
| '0201040102030101050101 | I | D | V | R | F | L | L | V | M | W | H | -909.103 |
| '0101020202020101030101 | V | D | L | H | F | I | L | V | I | W | H | -909.103 |
| '0301010102010101040107 | L | D | I | R | F | V | L | V | L | W | M | -909.102 |
| '0101010305010101040101 | V | D | I | K | V | V | L | V | L | W | H | -909.098 |
| '0101040404020101010101 | V | D | V | Q | M | I | L | V | V | W | H | -909.097 |
| '0201040402010103010101 | I | D | V | Q | F | V | L | I | V | W | H | -909.096 |
| '0101010204030101070101 | V | D | I | H | M | L | L | V | T | W | H | -909.094 |
| '0301010105010104020112 | L | D | I | R | V | V | L | L | A | W | V | -909.094 |
| '0301010405010104010104 | L | D | I | Q | V | V | L | L | V | W | I | -909.093 |
| '0101010105020301060108 | V | D | I | R | V | I | V | V | S | W | N | -909.091 |
| '0301040105040101010104 | L | D | V | R | V | M | L | V | V | W | I | -909.089 |
| '0101010102030301030112 | V | D | I | R | F | L | V | V | I | W | V | -909.087 |
| '0101010205030201010109 | V | D | I | H | V | L | A | V | V | W | Q | -909.086 |
| '0101030102040101020109 | V | D | M | R | F | M | L | V | A | W | Q | -909.085 |
| '0201030103010103010105 | I | D | M | R | I | V | L | I | V | W | K | -909.084 |
| '0101010103020403010102 | V | D | I | R | I | I | W | I | V | W | E | -909.083 |
| '0101010403010103040110 | V | D | I | Q | I | V | L | I | L | W | R | -909.082 |
| '0101040202010301010106 | V | D | V | H | F | V | V | V | V | W | L | -909.082 |
| '0101040402010101070110 | V | D | V | Q | F | V | L | V | T | W | R | -909.08  |
| '0301010103020104010104 | L | D | I | R | I | I | L | L | V | W | I | -909.072 |
| '0101010103020103070110 | V | D | I | R | I | I | L | I | T | W | R | -909.072 |

|                         |   |   |   |   |   |   |   |   |   |   |   |          |
|-------------------------|---|---|---|---|---|---|---|---|---|---|---|----------|
| '0101010105040301070101 | V | D | I | R | V | M | V | V | T | W | H | -909.069 |
| '0101030202010101030112 | V | D | M | H | F | V | L | V | I | W | V | -909.068 |
| '0101010403030103010106 | V | D | I | Q | I | L | L | I | V | W | L | -909.066 |
| '0101040104030101030105 | V | D | V | R | M | L | L | V | I | W | K | -909.064 |
| '0101010102040102040104 | V | D | I | R | F | M | L | A | L | W | I | -909.062 |
| '0101010202010303010110 | V | D | I | H | F | V | V | I | V | W | R | -909.06  |
| '0201040102010101020111 | I | D | V | R | F | V | L | V | A | W | T | -909.057 |
| '0101010102020303010107 | V | D | I | R | F | I | V | I | V | W | M | -909.057 |
| '0201010403030101010106 | I | D | I | Q | I | L | L | V | V | W | L | -909.052 |
| '0101020104030103010104 | V | D | L | R | M | L | L | I | V | W | I | -909.051 |
| '0101040401020103010108 | V | D | V | Q | L | I | L | I | V | W | N | -909.05  |
| '0101010105020201050104 | V | D | I | R | V | I | A | V | M | W | I | -909.046 |
| '0101030403030101060101 | V | D | M | Q | I | L | L | V | S | W | H | -909.046 |
| '0101030203030101040101 | V | D | M | H | I | L | L | V | L | W | H | -909.043 |
| '0101010205010201040111 | V | D | I | H | V | V | A | V | L | W | T | -909.042 |
| '0201010204030101010104 | I | D | I | H | M | L | L | V | V | W | I | -909.041 |
| '0101020103020101060112 | V | D | L | R | I | I | L | V | S | W | V | -909.041 |
| '0301040102010102010106 | L | D | V | R | F | V | L | A | V | W | L | -909.039 |
| '0101020103020103070101 | V | D | L | R | I | I | L | I | T | W | H | -909.038 |
| '0201010102010102020104 | I | D | I | R | F | V | L | A | A | W | I | -909.036 |
| '0301010205020104010101 | L | D | I | H | V | I | L | L | V | W | H | -909.036 |
| '0101010305020104020101 | V | D | I | K | V | I | L | L | A | W | H | -909.031 |
| '0101040302010101030109 | V | D | V | K | F | V | L | V | I | W | Q | -909.026 |
| '0201010402020101010109 | I | D | I | Q | F | I | L | V | V | W | Q | -909.023 |
| '0101010102030102050104 | V | D | I | R | F | L | L | A | M | W | I | -909.023 |
| '0301010102020101070104 | L | D | I | R | F | I | L | V | T | W | I | -909.018 |
| '0101040403030103010101 | V | D | V | Q | I | L | L | I | V | W | H | -909.017 |
| '0201040105010104010105 | I | D | V | R | V | V | L | L | V | W | K | -909.017 |
| '0101020202010104010104 | V | D | L | H | F | V | L | L | V | W | I | -909.014 |
| '0101010404010103030104 | V | D | I | Q | M | V | L | I | I | W | I | -909.014 |
| '0201010105010104020106 | I | D | I | R | V | V | L | L | A | W | L | -909.014 |
| '0101010203020301010109 | V | D | I | H | I | I | V | V | V | W | Q | -909.011 |
| '0101040404010103050101 | V | D | V | Q | M | V | L | I | M | W | H | -909.008 |
| '0101030105020101060112 | V | D | M | R | V | I | L | V | S | W | V | -909.007 |
| '0101010402030101020104 | V | D | I | Q | F | L | L | V | A | W | I | -909.007 |
| '0201010402020101070101 | I | D | I | Q | F | I | L | V | T | W | H | -909.006 |
| '0101040103010301040106 | V | D | V | R | I | V | V | V | L | W | L | -909.005 |

|                         |   |   |   |   |   |   |   |   |   |   |   |          |
|-------------------------|---|---|---|---|---|---|---|---|---|---|---|----------|
| '0101040102040101020106 | V | D | V | R | F | M | L | V | A | W | L | -909.004 |
| '0101030403030101010111 | V | D | M | Q | I | L | L | V | V | W | T | -909.003 |
| '0101010202020102020101 | V | D | I | H | F | I | L | A | A | W | H | -909.0   |
| '0101030105010304010106 | V | D | M | R | V | V | V | L | V | W | L | -908.996 |
| '0101040405010104010111 | V | D | V | Q | V | V | L | L | V | W | T | -908.994 |
| '0101010103020101060106 | V | D | I | R | I | I | L | V | S | W | L | -908.991 |
| '0201010102030101060106 | I | D | I | R | F | L | L | V | S | W | L | -908.987 |
| '0101030105030104010112 | V | D | M | R | V | L | L | L | V | W | V | -908.986 |
| '0101010202010103070105 | V | D | I | H | F | V | L | I | T | W | K | -908.985 |
| '0201010103020101020109 | I | D | I | R | I | I | L | V | A | W | Q | -908.984 |
| '0101030104040101070106 | V | D | M | R | M | M | L | V | T | W | L | -908.984 |
| '0101030101030101030105 | V | D | M | R | L | L | L | V | I | W | K | -908.983 |
| '0101040101020103050104 | V | D | V | R | L | I | L | I | M | W | I | -908.981 |
| '0101010102010403040108 | V | D | I | R | F | V | W | I | L | W | N | -908.98  |
| '0101040103040101010110 | V | D | V | R | I | M | L | V | V | W | R | -908.98  |
| '0101030203040101060101 | V | D | M | H | I | M | L | V | S | W | H | -908.979 |
| '0201010102040101060101 | I | D | I | R | F | M | L | V | S | W | H | -908.976 |
| '0101010205030104010112 | V | D | I | H | V | L | L | L | V | W | V | -908.976 |
| '0101010103010201040109 | V | D | I | R | I | V | A | V | L | W | Q | -908.968 |
| '0101030101030101020112 | V | D | M | R | L | L | L | V | A | W | V | -908.968 |
| '0201010205040101020101 | I | D | I | H | V | M | L | V | A | W | H | -908.967 |
| '0301030403020101010101 | L | D | M | Q | I | I | L | V | V | W | H | -908.965 |
| '0101040103010105020105 | V | D | V | R | I | V | L | M | A | W | K | -908.963 |
| '0101040105010101030105 | V | D | V | R | V | V | L | V | I | W | K | -908.959 |
| '0101020104020101040106 | V | D | L | R | M | I | L | V | L | W | L | -908.958 |
| '0101010205030101030103 | V | D | I | H | V | L | L | V | I | W | F | -908.958 |
| '0101010403020101010109 | V | D | I | Q | I | I | L | V | V | W | Q | -908.956 |
| '0301010105010104010101 | L | D | I | R | V | V | L | L | V | W | H | -908.953 |
| '0101010102020403010111 | V | D | I | R | F | I | W | I | V | W | T | -908.953 |
| '0101010102020304010110 | V | D | I | R | F | I | V | L | V | W | R | -908.95  |
| '0201020102020101020101 | I | D | L | R | F | I | L | V | A | W | H | -908.946 |
| '0101010204010103040112 | V | D | I | H | M | V | L | I | L | W | V | -908.945 |
| '0101040104010103010103 | V | D | V | R | M | V | L | I | V | W | F | -908.944 |
| '0101040402010103070101 | V | D | V | Q | F | V | L | I | T | W | H | -908.942 |
| '0301010104020101020104 | L | D | I | R | M | I | L | V | A | W | I | -908.94  |
| '0101010305020101050107 | V | D | I | K | V | I | L | V | M | W | M | -908.939 |
| '0101010305030101030109 | V | D | I | K | V | L | L | V | I | W | Q | -908.937 |

|                         |   |   |   |   |   |   |   |   |   |   |   |          |
|-------------------------|---|---|---|---|---|---|---|---|---|---|---|----------|
| '0101020105010101040105 | V | D | L | R | V | V | L | V | L | W | K | -908.935 |
| '0101040105020401010104 | V | D | V | R | V | I | W | V | V | W | I | -908.933 |
| '0101030104020101060108 | V | D | M | R | M | I | L | V | S | W | N | -908.933 |
| '0101040103020105020101 | V | D | V | R | I | I | L | M | A | W | H | -908.932 |
| '0301040305010101010106 | L | D | V | K | V | V | L | V | V | W | L | -908.931 |
| '0201010103030301070101 | I | D | I | R | I | L | V | V | T | W | H | -908.93  |
| '0101040102010102040109 | V | D | V | R | F | V | L | A | L | W | Q | -908.928 |
| '0101040405010101030104 | V | D | V | Q | V | V | L | V | I | W | I | -908.923 |
| '0201010202040101040101 | I | D | I | H | F | M | L | V | L | W | H | -908.922 |
| '0101010305020401010105 | V | D | I | K | V | I | W | V | V | W | K | -908.92  |
| '0201020103020101010112 | I | D | L | R | I | I | L | V | V | W | V | -908.919 |
| '0101010203020101040107 | V | D | I | H | I | I | L | V | L | W | M | -908.914 |
| '0101010302020101050110 | V | D | I | K | F | I | L | V | M | W | R | -908.913 |
| '0101040103020201010107 | V | D | V | R | I | I | A | V | V | W | M | -908.904 |
| '0101010103020301060102 | V | D | I | R | I | I | V | V | S | W | E | -908.904 |
| '0101020204010103010102 | V | D | L | H | M | V | L | I | V | W | E | -908.904 |
| '0101010302010403010104 | V | D | I | K | F | V | W | I | V | W | I | -908.897 |
| '0201010302010103070101 | I | D | I | K | F | V | L | I | T | W | H | -908.897 |
| '0101010302010105040106 | V | D | I | K | F | V | L | M | L | W | L | -908.896 |
| '0201040103030201010101 | I | D | V | R | I | L | A | V | V | W | H | -908.894 |
| '0101010105030101070102 | V | D | I | R | V | L | L | V | T | W | E | -908.893 |
| '0101020205010101020109 | V | D | L | H | V | V | L | V | A | W | Q | -908.891 |
| '0101030305010101070108 | V | D | M | K | V | V | L | V | T | W | N | -908.889 |
| '0201010205010105010108 | I | D | I | H | V | V | L | M | V | W | N | -908.888 |
| '0101040402010101050109 | V | D | V | Q | F | V | L | V | M | W | Q | -908.887 |
| '0201010102030201010101 | I | D | I | R | F | L | A | V | V | W | H | -908.886 |
| '0101010202040101070102 | V | D | I | H | F | M | L | V | T | W | E | -908.885 |
| '0101010102030303040101 | V | D | I | R | F | L | V | I | L | W | H | -908.884 |
| '0201010203010102010103 | I | D | I | H | I | V | L | A | V | W | F | -908.884 |
| '0101030403040101010106 | V | D | M | Q | I | M | L | V | V | W | L | -908.884 |
| '0201010102010101070101 | I | D | I | R | F | V | L | V | T | W | H | -908.883 |
| '0101010103040101010103 | V | D | I | R | I | M | L | V | V | W | F | -908.883 |
| '0101010201010203040104 | V | D | I | H | L | V | A | I | L | W | I | -908.881 |
| '0101020103030103010112 | V | D | L | R | I | L | L | I | V | W | V | -908.881 |
| '0101010203010104020104 | V | D | I | H | I | V | L | L | A | W | I | -908.878 |
| '0101030104020101020110 | V | D | M | R | M | I | L | V | A | W | R | -908.871 |
| '0101010102040201020110 | V | D | I | R | F | M | A | V | A | W | R | -908.871 |

|                         |   |   |   |   |   |   |   |   |   |   |   |          |
|-------------------------|---|---|---|---|---|---|---|---|---|---|---|----------|
| '0201010103010104010104 | I | D | I | R | I | V | L | L | V | W | I | -908.87  |
| '0201010102010403010105 | I | D | I | R | F | V | W | I | V | W | K | -908.87  |
| '0101040203020201010101 | V | D | V | H | I | I | A | V | V | W | H | -908.867 |
| '0301040103010102010104 | L | D | V | R | I | V | L | A | V | W | I | -908.867 |
| '0101010402020101010108 | V | D | I | Q | F | I | L | V | V | W | N | -908.865 |
| '0101040205040101010109 | V | D | V | H | V | M | L | V | V | W | Q | -908.864 |
| '0301010102020104010108 | L | D | I | R | F | I | L | L | V | W | N | -908.86  |
| '0101010204010104040106 | V | D | I | H | M | V | L | L | L | W | L | -908.859 |
| '0101010102010101060108 | V | D | I | R | F | V | L | V | S | W | N | -908.859 |
| '0101040102040103010106 | V | D | V | R | F | M | L | I | V | W | L | -908.857 |
| '0101040103030301010107 | V | D | V | R | I | L | V | V | V | W | M | -908.857 |
| '0101010102010301040108 | V | D | I | R | F | V | V | V | L | W | N | -908.855 |
| '0101010204040101010103 | V | D | I | H | M | M | L | V | V | W | F | -908.852 |
| '0201030102040101010106 | I | D | M | R | F | M | L | V | V | W | L | -908.841 |
| '0101030203010102040101 | V | D | M | H | I | V | L | A | L | W | H | -908.84  |
| '0101010403020401010104 | V | D | I | Q | I | I | W | V | V | W | I | -908.84  |
| '0101010204010103050104 | V | D | I | H | M | V | L | I | M | W | I | -908.835 |
| '0101040105020105050101 | V | D | V | R | V | I | L | M | M | W | H | -908.834 |
| '0101040102040101010111 | V | D | V | R | F | M | L | V | V | W | T | -908.833 |
| '0101040102010303010101 | V | D | V | R | F | V | V | I | V | W | H | -908.832 |
| '0201010104030101010101 | I | D | I | R | M | L | L | V | V | W | H | -908.831 |
| '0201010304040101010101 | I | D | I | K | M | M | L | V | V | W | H | -908.829 |
| '0101040105020201010108 | V | D | V | R | V | I | A | V | V | W | N | -908.823 |
| '0201010402030101040101 | I | D | I | Q | F | L | L | V | L | W | H | -908.82  |
| '0101040103020102010105 | V | D | V | R | I | I | L | A | V | W | K | -908.819 |
| '0101030303010101050105 | V | D | M | K | I | V | L | V | M | W | K | -908.817 |
| '0201040305010103010101 | I | D | V | K | V | V | L | I | V | W | H | -908.817 |
| '0101010103010103030104 | V | D | I | R | I | V | L | I | I | W | I | -908.817 |
| '0101010203030103070101 | V | D | I | H | I | L | L | I | T | W | H | -908.817 |
| '0201040102010101050105 | I | D | V | R | F | V | L | V | M | W | K | -908.816 |
| '0101010203040101020101 | V | D | I | H | I | M | L | V | A | W | H | -908.813 |
| '0101030103040101070109 | V | D | M | R | I | M | L | V | T | W | Q | -908.812 |
| '0101010204040101050101 | V | D | I | H | M | M | L | V | M | W | H | -908.812 |
| '0101010102020401040112 | V | D | I | R | F | I | W | V | L | W | V | -908.81  |
| '0101010103020301050112 | V | D | I | R | I | I | V | V | M | W | V | -908.809 |
| '0101030305010101050110 | V | D | M | K | V | V | L | V | M | W | R | -908.807 |
| '0201030203010101010109 | I | D | M | H | I | V | L | V | V | W | Q | -908.807 |

|                         |   |   |   |   |   |   |   |   |   |   |   |          |
|-------------------------|---|---|---|---|---|---|---|---|---|---|---|----------|
| '0101010102020103060109 | V | D | I | R | F | I | L | I | S | W | Q | -908.807 |
| '0101010203010103050111 | V | D | I | H | I | V | L | I | M | W | T | -908.806 |
| '0101030102040301070101 | V | D | M | R | F | M | V | V | T | W | H | -908.806 |
| '0101030105010201010110 | V | D | M | R | V | V | A | V | V | W | R | -908.804 |
| '0101040102020301010109 | V | D | V | R | F | I | V | V | V | W | Q | -908.803 |
| '0101010402030104010106 | V | D | I | Q | F | L | L | L | V | W | L | -908.802 |
| '0101040402030104010101 | V | D | V | Q | F | L | L | L | V | W | H | -908.802 |
| '0101010202010401010110 | V | D | I | H | F | V | W | V | V | W | R | -908.801 |
| '0201040205010101010109 | I | D | V | H | V | V | L | V | V | W | Q | -908.8   |
| '0101010105030303010101 | V | D | I | R | V | L | V | I | V | W | H | -908.8   |
| '0101010101020101040105 | V | D | I | R | L | I | L | V | L | W | K | -908.799 |
| '0101010205010104050104 | V | D | I | H | V | V | L | L | M | W | I | -908.799 |
| '0101040301020101010106 | V | D | V | K | L | I | L | V | V | W | L | -908.798 |
| '0301010402010101040106 | L | D | I | Q | F | V | L | V | L | W | L | -908.794 |
| '0101040102010301020101 | V | D | V | R | F | V | V | V | A | W | H | -908.793 |
| '0101030103030103020101 | V | D | M | R | I | L | L | I | A | W | H | -908.792 |
| '0201010102040101040106 | I | D | I | R | F | M | L | V | L | W | L | -908.791 |
| '0101040105010103010112 | V | D | V | R | V | V | L | I | V | W | V | -908.79  |
| '0101010302010203010106 | V | D | I | K | F | V | A | I | V | W | L | -908.79  |
| '0101030401020101030106 | V | D | M | Q | L | I | L | V | I | W | L | -908.788 |
| '0101020202010103030101 | V | D | L | H | F | V | L | I | I | W | H | -908.783 |
| '0101020101020101040104 | V | D | L | R | L | I | L | V | L | W | I | -908.781 |
| '0101010205040201010105 | V | D | I | H | V | M | A | V | V | W | K | -908.779 |
| '0201030202010101050101 | I | D | M | H | F | V | L | V | M | W | H | -908.776 |
| '0201020105020201010101 | I | D | L | R | V | I | A | V | V | W | H | -908.774 |
| '0101010303040101030112 | V | D | I | K | I | M | L | V | I | W | V | -908.773 |
| '0301010203010102010101 | L | D | I | H | I | V | L | A | V | W | H | -908.77  |
| '0101010201040201040106 | V | D | I | H | L | M | A | V | L | W | L | -908.769 |
| '0101040103010403010101 | V | D | V | R | I | V | W | I | V | W | H | -908.764 |
| '0101010103030101030106 | V | D | I | R | I | L | L | V | I | W | L | -908.763 |
| '0101040105030103010111 | V | D | V | R | V | L | L | I | V | W | T | -908.757 |
| '0101010105030301020109 | V | D | I | R | V | L | V | V | A | W | Q | -908.756 |
| '0101040103010103020106 | V | D | V | R | I | V | L | I | A | W | L | -908.752 |
| '0101010102010204010101 | V | D | I | R | F | V | A | L | V | W | H | -908.751 |
| '0301020102020101010104 | L | D | L | R | F | I | L | V | V | W | I | -908.748 |
| '0101040102040101050101 | V | D | V | R | F | M | L | V | M | W | H | -908.747 |
| '0101020102010103060109 | V | D | L | R | F | V | L | I | S | W | Q | -908.743 |

|                         |   |   |   |   |   |   |   |   |   |   |   |          |
|-------------------------|---|---|---|---|---|---|---|---|---|---|---|----------|
| '0101010205030102040101 | V | D | I | H | V | L | L | A | L | W | H | -908.743 |
| '0101010105010102040112 | V | D | I | R | V | V | L | A | L | W | V | -908.743 |
| '0201010405010101040106 | I | D | I | Q | V | V | L | V | L | W | L | -908.74  |
| '0101030103010103020104 | V | D | M | R | I | V | L | I | A | W | I | -908.739 |
| '0201030205010101010104 | I | D | M | H | V | V | L | V | V | W | I | -908.736 |
| '0101010304040101040106 | V | D | I | K | M | M | L | V | L | W | L | -908.735 |
| '0301010103010102010105 | L | D | I | R | I | V | L | A | V | W | K | -908.729 |
| '0201020103020101070101 | I | D | L | R | I | I | L | V | T | W | H | -908.728 |
| '0101010104040101040105 | V | D | I | R | M | M | L | V | L | W | K | -908.725 |
| '0101020102020104010108 | V | D | L | R | F | I | L | L | V | W | N | -908.725 |
| '0101040201010104070106 | V | D | V | H | L | V | L | L | T | W | L | -908.722 |
| '0101040201020104010104 | V | D | V | H | L | I | L | L | V | W | I | -908.716 |
| '0101020201020101070101 | V | D | L | H | L | I | L | V | T | W | H | -908.714 |
| '0101010105010303010105 | V | D | I | R | V | V | V | I | V | W | K | -908.713 |
| '0301040105010102010101 | L | D | V | R | V | V | L | A | V | W | H | -908.71  |
| '0101040101020101040107 | V | D | V | R | L | I | L | V | L | W | M | -908.71  |
| '0101040305030101070101 | V | D | V | K | V | L | L | V | T | W | H | -908.708 |
| '0101010104010101040104 | V | D | I | R | M | V | L | V | L | W | I | -908.707 |
| '0101030205010105010106 | V | D | M | H | V | V | L | M | V | W | L | -908.704 |
| '0101010202010104050108 | V | D | I | H | F | V | L | L | M | W | N | -908.704 |
| '0101040103040101020111 | V | D | V | R | I | M | L | V | A | W | T | -908.702 |
| '0101030201030101050107 | V | D | M | H | L | L | L | V | M | W | M | -908.697 |
| '0101010202030104040101 | V | D | I | H | F | L | L | L | L | W | H | -908.695 |
| '0101030101030101010104 | V | D | M | R | L | L | L | V | V | W | I | -908.694 |
| '0101040105010301010112 | V | D | V | R | V | V | V | V | V | W | V | -908.691 |
| '0301010105010101070108 | L | D | I | R | V | V | L | V | T | W | N | -908.69  |
| '0101020104030101070106 | V | D | L | R | M | L | L | V | T | W | L | -908.688 |
| '0101040102010105050101 | V | D | V | R | F | V | L | M | M | W | H | -908.688 |
| '0101010402010105040104 | V | D | I | Q | F | V | L | M | L | W | I | -908.688 |
| '0101030201030101020110 | V | D | M | H | L | L | L | V | A | W | R | -908.685 |
| '0101030103010103030107 | V | D | M | R | I | V | L | I | I | W | M | -908.684 |
| '0201040104020101010109 | I | D | V | R | M | I | L | V | V | W | Q | -908.68  |
| '0301040105010101040108 | L | D | V | R | V | V | L | V | L | W | N | -908.678 |
| '0101030103030301050101 | V | D | M | R | I | L | V | V | M | W | H | -908.676 |
| '0201010104030101040105 | I | D | I | R | M | L | L | V | L | W | K | -908.675 |
| '0301010103010104010108 | L | D | I | R | I | V | L | L | V | W | N | -908.669 |
| '0301010205040101010105 | L | D | I | H | V | M | L | V | V | W | K | -908.666 |

|                         |   |   |   |   |   |   |   |   |   |   |   |          |
|-------------------------|---|---|---|---|---|---|---|---|---|---|---|----------|
| '0101010202010304010102 | V | D | I | H | F | V | V | L | V | W | E | -908.666 |
| '0101030102010101060105 | V | D | M | R | F | V | L | V | S | W | K | -908.666 |
| '0101010202020103070101 | V | D | I | H | F | I | L | I | T | W | H | -908.666 |
| '0201010403030101060101 | I | D | I | Q | I | L | L | V | S | W | H | -908.66  |
| '0301010102010102070109 | L | D | I | R | F | V | L | A | T | W | Q | -908.66  |
| '0101040102020201010104 | V | D | V | R | F | I | A | V | V | W | I | -908.659 |
| '0101010105020401040109 | V | D | I | R | V | I | W | V | L | W | Q | -908.659 |
| '0101030105030101030109 | V | D | M | R | V | L | L | V | I | W | Q | -908.657 |
| '0101020402010101070101 | V | D | L | Q | F | V | L | V | T | W | H | -908.654 |
| '0101010105020401070107 | V | D | I | R | V | I | W | V | T | W | M | -908.654 |
| '0101010103020301020106 | V | D | I | R | I | I | V | V | A | W | L | -908.653 |
| '0101040302010105010106 | V | D | V | K | F | V | L | M | V | W | L | -908.649 |
| '0101030105010204010108 | V | D | M | R | V | V | A | L | V | W | N | -908.648 |
| '0101040202010104010110 | V | D | V | H | F | V | L | L | V | W | R | -908.645 |
| '0101040103010204010105 | V | D | V | R | I | V | A | L | V | W | K | -908.643 |
| '0201040104010103040101 | I | D | V | R | M | V | L | I | L | W | H | -908.639 |
| '0101030103020104010101 | V | D | M | R | I | I | L | L | V | W | H | -908.639 |
| '0101030201010103020105 | V | D | M | H | L | V | L | I | A | W | K | -908.638 |
| '0201010201030101020107 | I | D | I | H | L | L | L | V | A | W | M | -908.635 |
| '0101020105020101050103 | V | D | L | R | V | I | L | V | M | W | F | -908.634 |
| '0301040405010101010104 | L | D | V | Q | V | V | L | V | V | W | I | -908.632 |
| '0101040104030101010107 | V | D | V | R | M | L | L | V | V | W | M | -908.63  |
| '0101040105020301010101 | V | D | V | R | V | I | V | V | V | W | H | -908.629 |
| '0301010102040101010105 | L | D | I | R | F | M | L | V | V | W | K | -908.623 |
| '0101030102010105020101 | V | D | M | R | F | V | L | M | A | W | H | -908.623 |
| '0201010402010105010104 | I | D | I | Q | F | V | L | M | V | W | I | -908.621 |
| '0101040202010102040101 | V | D | V | H | F | V | L | A | L | W | H | -908.621 |
| '0101040403020105010101 | V | D | V | Q | I | I | L | M | V | W | H | -908.619 |
| '0101040302030101060101 | V | D | V | K | F | L | L | V | S | W | H | -908.618 |
| '0101030201020101060112 | V | D | M | H | L | I | L | V | S | W | V | -908.618 |
| '0101030105010104020103 | V | D | M | R | V | V | L | L | A | W | F | -908.617 |
| '0101040103010101070109 | V | D | V | R | I | V | L | V | T | W | Q | -908.617 |
| '0101030203040103010101 | V | D | M | H | I | M | L | I | V | W | H | -908.616 |
| '0301010402020101010105 | L | D | I | Q | F | I | L | V | V | W | K | -908.615 |
| '0101010102030401040105 | V | D | I | R | F | L | W | V | L | W | K | -908.613 |
| '0101010404010101040109 | V | D | I | Q | M | V | L | V | L | W | Q | -908.608 |
| '0101040105010105050104 | V | D | V | R | V | V | L | M | M | W | I | -908.606 |



|                         |   |   |   |   |   |   |   |   |   |   |   |          |
|-------------------------|---|---|---|---|---|---|---|---|---|---|---|----------|
| '0101030405030101020101 | V | D | M | Q | V | L | L | V | A | W | H | -908.603 |
| '0301010202010105010109 | L | D | I | H | F | V | L | M | V | W | Q | -908.602 |
| '0201030205040101010101 | I | D | M | H | V | M | L | V | V | W | H | -908.6   |
| '0101010103040101060101 | V | D | I | R | I | M | L | V | S | W | H | -908.598 |
| '0101010105020103070105 | V | D | I | R | V | I | L | I | T | W | K | -908.597 |
| '0101010102030301070106 | V | D | I | R | F | L | V | V | T | W | L | -908.594 |
| '0201010104010105010101 | I | D | I | R | M | V | L | M | V | W | H | -908.592 |
| '0101010301010103030106 | V | D | I | K | L | V | L | I | I | W | L | -908.586 |
| '0101010404030101010106 | V | D | I | Q | M | L | L | V | V | W | L | -908.586 |
| '0301040302010101010105 | L | D | V | K | F | V | L | V | V | W | K | -908.584 |
| '0101030105010201050101 | V | D | M | R | V | V | A | V | M | W | H | -908.582 |
| '0201030103010101020105 | I | D | M | R | I | V | L | V | A | W | K | -908.581 |
| '0201010102030301010102 | I | D | I | R | F | L | V | V | V | W | E | -908.575 |
| '0101010402040101010104 | V | D | I | Q | F | M | L | V | V | W | I | -908.571 |
| '0101010205030301010105 | V | D | I | H | V | L | V | V | V | W | K | -908.571 |
| '0101030102010104060108 | V | D | M | R | F | V | L | L | S | W | N | -908.57  |
| '0301010205010101010106 | L | D | I | H | V | V | L | V | V | W | L | -908.569 |
| '0101040102030304010101 | V | D | V | R | F | L | V | L | V | W | H | -908.569 |
| '0101030102040201010109 | V | D | M | R | F | M | A | V | V | W | Q | -908.568 |
| '0101010204020104010110 | V | D | I | H | M | I | L | L | V | W | R | -908.567 |
| '0101010204020103030101 | V | D | I | H | M | I | L | I | I | W | H | -908.566 |
| '0101010105030201020105 | V | D | I | R | V | L | A | V | A | W | K | -908.563 |
| '0201020105010101020106 | I | D | L | R | V | V | L | V | A | W | L | -908.562 |
| '0101040103010301070110 | V | D | V | R | I | V | V | V | T | W | R | -908.562 |
| '0101010205010104030112 | V | D | I | H | V | V | L | L | I | W | V | -908.561 |
| '0101010205010102040109 | V | D | I | H | V | V | L | A | L | W | Q | -908.56  |
| '0101030102030102020101 | V | D | M | R | F | L | L | A | A | W | H | -908.56  |
| '0101040405010101050108 | V | D | V | Q | V | V | L | V | M | W | N | -908.558 |
| '0101030104010101040107 | V | D | M | R | M | V | L | V | L | W | M | -908.557 |
| '0101010102040101060106 | V | D | I | R | F | M | L | V | S | W | L | -908.556 |
| '0101040404010104040101 | V | D | V | Q | M | V | L | L | L | W | H | -908.556 |
| '0201010102030402010101 | I | D | I | R | F | L | W | A | V | W | H | -908.554 |
| '0101030101010101040108 | V | D | M | R | L | V | L | V | L | W | N | -908.553 |
| '0101010105010301070106 | V | D | I | R | V | V | V | V | T | W | L | -908.551 |
| '0101010203020104010107 | V | D | I | H | I | I | L | L | V | W | M | -908.551 |
| '0201010103020401010105 | I | D | I | R | I | I | W | V | V | W | K | -908.548 |
| '0101020404010103010101 | V | D | L | Q | M | V | L | I | V | W | H | -908.548 |

|                         |   |   |   |   |   |   |   |   |   |   |   |          |
|-------------------------|---|---|---|---|---|---|---|---|---|---|---|----------|
| '0101040405010105010106 | V | D | V | Q | V | V | L | M | V | W | L | -908.547 |
| '0101030202010201010104 | V | D | M | H | F | V | A | V | V | W | I | -908.546 |
| '0101010205020401010110 | V | D | I | H | V | I | W | V | V | W | R | -908.545 |
| '0101010102020104020108 | V | D | I | R | F | I | L | L | A | W | N | -908.544 |
| '0101020205010101010103 | V | D | L | H | V | V | L | V | V | W | F | -908.535 |
| '0101010102010101030105 | V | D | I | R | F | V | L | V | I | W | K | -908.534 |
| '0101040301030101020106 | V | D | V | K | L | L | L | V | A | W | L | -908.532 |
| '0101040204020104010101 | V | D | V | H | M | I | L | L | V | W | H | -908.532 |
| '0301040102010101070110 | L | D | V | R | F | V | L | V | T | W | R | -908.53  |
| '0101040302010101070103 | V | D | V | K | F | V | L | V | T | W | F | -908.529 |
| '0201010103040101010101 | I | D | I | R | I | M | L | V | V | W | H | -908.527 |
| '0101010102030201010112 | V | D | I | R | F | L | A | V | V | W | V | -908.527 |
| '0101040405030101060101 | V | D | V | Q | V | L | L | V | S | W | H | -908.525 |
| '0201010402040101020101 | I | D | I | Q | F | M | L | V | A | W | H | -908.525 |
| '0101010304040101010104 | V | D | I | K | M | M | L | V | V | W | I | -908.517 |
| '0101040405040103010101 | V | D | V | Q | V | M | L | I | V | W | H | -908.516 |
| '0301010102040101070106 | L | D | I | R | F | M | L | V | T | W | L | -908.509 |
| '0101010203020401070101 | V | D | I | H | I | I | W | V | T | W | H | -908.508 |
| '0101020304010101040104 | V | D | L | K | M | V | L | V | L | W | I | -908.507 |
| '0101010403040101040112 | V | D | I | Q | I | M | L | V | L | W | V | -908.507 |
| '0101020102040101020111 | V | D | L | R | F | M | L | V | A | W | T | -908.506 |
| '0101030104040103010106 | V | D | M | R | M | M | L | I | V | W | L | -908.506 |
| '0101010402010104060104 | V | D | I | Q | F | V | L | L | S | W | I | -908.504 |
| '0101040102010401040110 | V | D | V | R | F | V | W | V | L | W | R | -908.5   |
| '0201040302010101010112 | I | D | V | K | F | V | L | V | V | W | V | -908.5   |
| '0201010202020301010101 | I | D | I | H | F | I | V | V | V | W | H | -908.499 |
| '0301010102020103010105 | L | D | I | R | F | I | L | I | V | W | K | -908.497 |
| '0101030103010104040102 | V | D | M | R | I | V | L | L | L | W | E | -908.495 |
| '0101040105040103040101 | V | D | V | R | V | M | L | I | L | W | H | -908.493 |
| '0101010405040101060104 | V | D | I | Q | V | M | L | V | S | W | I | -908.493 |
| '0201010103010103010110 | I | D | I | R | I | V | L | I | V | W | R | -908.49  |
| '0101040101020103020106 | V | D | V | R | L | I | L | I | A | W | L | -908.49  |
| '0201040202020101010101 | I | D | V | H | F | I | L | V | V | W | H | -908.489 |
| '0201010102010105030112 | I | D | I | R | F | V | L | M | I | W | V | -908.488 |
| '0101030402010101020102 | V | D | M | Q | F | V | L | V | A | W | E | -908.488 |
| '0101040301030101040102 | V | D | V | K | L | L | L | V | L | W | E | -908.487 |
| '0201030102010105010101 | I | D | M | R | F | V | L | M | V | W | H | -908.486 |

|                         |   |   |   |   |   |   |   |   |   |   |   |          |
|-------------------------|---|---|---|---|---|---|---|---|---|---|---|----------|
| '0101020202040101070101 | V | D | L | H | F | M | L | V | T | W | H | -908.486 |
| '0101010402040101070103 | V | D | I | Q | F | M | L | V | T | W | F | -908.485 |
| '0101020403010103010110 | V | D | L | Q | I | V | L | I | V | W | R | -908.48  |
| '0101040103010203010106 | V | D | V | R | I | V | A | I | V | W | L | -908.48  |
| '0101020105030101050101 | V | D | L | R | V | L | L | V | M | W | H | -908.479 |
| '0101030304010101030106 | V | D | M | K | M | V | L | V | I | W | L | -908.479 |
| '0101040103020303010101 | V | D | V | R | I | I | V | I | V | W | H | -908.478 |
| '0101030402010104010108 | V | D | M | Q | F | V | L | L | V | W | N | -908.476 |
| '0101010103020201060108 | V | D | I | R | I | I | A | V | S | W | N | -908.475 |
| '0101010102010301020105 | V | D | I | R | F | V | V | V | A | W | K | -908.474 |
| '0101030201030103040101 | V | D | M | H | L | L | L | I | L | W | H | -908.472 |
| '0201010102020401010101 | I | D | I | R | F | I | W | V | V | W | H | -908.471 |
| '0101040402010104010105 | V | D | V | Q | F | V | L | L | V | W | K | -908.469 |
| '0101040105010105020112 | V | D | V | R | V | V | L | M | A | W | V | -908.466 |
| '0101010105020101040108 | V | D | I | R | V | I | L | V | L | W | N | -908.466 |
| '0101030101020101020109 | V | D | M | R | L | I | L | V | A | W | Q | -908.46  |
| '0101030102030104070101 | V | D | M | R | F | L | L | L | T | W | H | -908.459 |
| '0101010205010101050103 | V | D | I | H | V | V | L | V | M | W | F | -908.458 |
| '0101010201030103040112 | V | D | I | H | L | L | L | I | L | W | V | -908.458 |
| '0101010103020102040110 | V | D | I | R | I | I | L | A | L | W | R | -908.452 |
| '0301040103030105010101 | L | D | V | R | I | L | L | M | V | W | H | -908.452 |
| '0101030102010103020111 | V | D | M | R | F | V | L | I | A | W | T | -908.451 |
| '0101010105030401010112 | V | D | I | R | V | L | W | V | V | W | V | -908.447 |
| '0101030101010103040102 | V | D | M | R | L | V | L | I | L | W | E | -908.442 |
| '0101010302010103060108 | V | D | I | K | F | V | L | I | S | W | N | -908.441 |
| '0101040203030105010101 | V | D | V | H | I | L | L | M | V | W | H | -908.441 |
| '0201020302030101010101 | I | D | L | K | F | L | L | V | V | W | H | -908.44  |
| '0101010104030101070109 | V | D | I | R | M | L | L | V | T | W | Q | -908.439 |
| '0101010201030201060112 | V | D | I | H | L | L | A | V | S | W | V | -908.437 |
| '0101030102010304010110 | V | D | M | R | F | V | V | L | V | W | R | -908.437 |
| '0101040104010104020109 | V | D | V | R | M | V | L | L | A | W | Q | -908.436 |
| '0101040204010105010105 | V | D | V | H | M | V | L | M | V | W | K | -908.429 |
| '0101030103010103070105 | V | D | M | R | I | V | L | I | T | W | K | -908.428 |
| '0201030102010103010108 | I | D | M | R | F | V | L | I | V | W | N | -908.427 |
| '0101040102010201020112 | V | D | V | R | F | V | A | V | A | W | V | -908.426 |
| '0101040102010204010111 | V | D | V | R | F | V | A | L | V | W | T | -908.426 |
| '0101010105030101040112 | V | D | I | R | V | L | L | V | L | W | V | -908.426 |

|                         |   |   |   |   |   |   |   |   |   |   |   |          |
|-------------------------|---|---|---|---|---|---|---|---|---|---|---|----------|
| '0101010104020101070101 | V | D | I | R | M | I | L | V | T | W | H | -908.417 |
| '0101010303030101010105 | V | D | I | K | I | L | L | V | V | W | K | -908.414 |
| '0101010103030104040110 | V | D | I | R | I | L | L | L | L | W | R | -908.413 |
| '0101040102010201070108 | V | D | V | R | F | V | A | V | T | W | N | -908.41  |
| '0201010105010104070105 | I | D | I | R | V | V | L | L | T | W | K | -908.409 |
| '0101020201020101010109 | V | D | L | H | L | I | L | V | V | W | Q | -908.407 |
| '0201040101030103010106 | I | D | V | R | L | L | L | I | V | W | L | -908.405 |
| '0201040102020101010110 | I | D | V | R | F | I | L | V | V | W | R | -908.404 |
| '0101040102010104060109 | V | D | V | R | F | V | L | L | S | W | Q | -908.404 |
| '0101010404010103070105 | V | D | I | Q | M | V | L | I | T | W | K | -908.404 |
| '0101040104010103070108 | V | D | V | R | M | V | L | I | T | W | N | -908.403 |
| '0101020102030101050112 | V | D | L | R | F | L | L | V | M | W | V | -908.4   |
| '0101010101010104040106 | V | D | I | R | L | V | L | L | L | W | L | -908.396 |
| '0201010105010201010106 | I | D | I | R | V | V | A | V | V | W | L | -908.394 |
| '0301010403020101070101 | L | D | I | Q | I | I | L | V | T | W | H | -908.393 |
| '0101020102010103030111 | V | D | L | R | F | V | L | I | I | W | T | -908.392 |
| '0101010203010403010109 | V | D | I | H | I | V | W | I | V | W | Q | -908.391 |
| '0101030105010403010112 | V | D | M | R | V | V | W | I | V | W | V | -908.391 |
| '0201010105010104010109 | I | D | I | R | V | V | L | L | V | W | Q | -908.387 |
| '0101010105020104070106 | V | D | I | R | V | I | L | L | T | W | L | -908.386 |
| '0101040201020203010101 | V | D | V | H | L | I | A | I | V | W | H | -908.386 |
| '0101010102020203030101 | V | D | I | R | F | I | A | I | I | W | H | -908.386 |
| '0101020204010101070104 | V | D | L | H | M | V | L | V | T | W | I | -908.383 |
| '0101010102020105040104 | V | D | I | R | F | I | L | M | L | W | I | -908.383 |
| '0101010102010105030110 | V | D | I | R | F | V | L | M | I | W | R | -908.381 |
| '0101040102010401070109 | V | D | V | R | F | V | W | V | T | W | Q | -908.374 |
| '0101010402020401070101 | V | D | I | Q | F | I | W | V | T | W | H | -908.373 |
| '0101010105040101010109 | V | D | I | R | V | M | L | V | V | W | Q | -908.369 |
| '0201030105010101060104 | I | D | M | R | V | V | L | V | S | W | I | -908.369 |
| '0101040105020102040101 | V | D | V | R | V | I | L | A | L | W | H | -908.363 |
| '0101030202030102010101 | V | D | M | H | F | L | L | A | V | W | H | -908.361 |
| '0101010101010103040105 | V | D | I | R | L | V | L | I | L | W | K | -908.356 |
| '0301010102020102010104 | L | D | I | R | F | I | L | A | V | W | I | -908.355 |
| '0101040202020401010101 | V | D | V | H | F | I | W | V | V | W | H | -908.354 |
| '0101040402010105010112 | V | D | V | Q | F | V | L | M | V | W | V | -908.353 |
| '0101040102010201030110 | V | D | V | R | F | V | A | V | I | W | R | -908.351 |
| '0201010105040101030102 | I | D | I | R | V | M | L | V | I | W | E | -908.346 |

|                         |   |   |   |   |   |   |   |   |   |   |   |          |
|-------------------------|---|---|---|---|---|---|---|---|---|---|---|----------|
| '0101010104010103040109 | V | D | I | R | M | V | L | I | L | W | Q | -908.344 |
| '0201010105010105020112 | I | D | I | R | V | V | L | M | A | W | V | -908.343 |
| '0101030102010105040102 | V | D | M | R | F | V | L | M | L | W | E | -908.342 |
| '0101010102040101020102 | V | D | I | R | F | M | L | V | A | W | E | -908.337 |
| '0101010402020101050103 | V | D | I | Q | F | I | L | V | M | W | F | -908.336 |
| '0101010102020102050110 | V | D | I | R | F | I | L | A | M | W | R | -908.336 |
| '0201030205010103010101 | I | D | M | H | V | V | L | I | V | W | H | -908.334 |
| '0101040105010201030104 | V | D | V | R | V | V | A | V | I | W | I | -908.333 |
| '0101040102010102020104 | V | D | V | R | F | V | L | A | A | W | I | -908.33  |
| '0201010102010101040109 | I | D | I | R | F | V | L | V | L | W | Q | -908.328 |
| '0301010201020101040105 | L | D | I | H | L | I | L | V | L | W | K | -908.327 |
| '0201040105020101010108 | I | D | V | R | V | I | L | V | V | W | N | -908.327 |
| '0101010201020101020102 | V | D | I | H | L | I | L | V | A | W | E | -908.326 |
| '0101010303020101020112 | V | D | I | K | I | I | L | V | A | W | V | -908.321 |
| '0101030101020101050103 | V | D | M | R | L | I | L | V | M | W | F | -908.319 |
| '0201010202010102040101 | I | D | I | H | F | V | L | A | L | W | H | -908.317 |
| '0101040201030101070105 | V | D | V | H | L | L | L | V | T | W | K | -908.315 |
| '0101010105040103040108 | V | D | I | R | V | M | L | I | L | W | N | -908.315 |
| '0201020102010102010101 | I | D | L | R | F | V | L | A | V | W | H | -908.315 |
| '0101030203010101050107 | V | D | M | H | I | V | L | V | M | W | M | -908.314 |
| '0101010402010204010108 | V | D | I | Q | F | V | A | L | V | W | N | -908.313 |
| '0101030105030101050108 | V | D | M | R | V | L | L | V | M | W | N | -908.311 |
| '0101010103020103030102 | V | D | I | R | I | I | L | I | I | W | E | -908.304 |
| '0101010302010103070109 | V | D | I | K | F | V | L | I | T | W | Q | -908.303 |
| '0101020403030101070101 | V | D | L | Q | I | L | L | V | T | W | H | -908.301 |
| '0201010205010101030104 | I | D | I | H | V | V | L | V | I | W | I | -908.301 |
| '0101030105010105070105 | V | D | M | R | V | V | L | M | T | W | K | -908.3   |
| '0101010103020401050105 | V | D | I | R | I | I | W | V | M | W | K | -908.299 |
| '0101010303010101040105 | V | D | I | K | I | V | L | V | L | W | K | -908.292 |
| '0101040201020101010108 | V | D | V | H | L | I | L | V | V | W | N | -908.292 |
| '0101020101020103030104 | V | D | L | R | L | I | L | I | I | W | I | -908.281 |
| '0101010204010103030111 | V | D | I | H | M | V | L | I | I | W | T | -908.281 |
| '0101010103040101030102 | V | D | I | R | I | M | L | V | I | W | E | -908.279 |
| '0101040102010102010103 | V | D | V | R | F | V | L | A | V | W | F | -908.279 |
| '0101010203010104040102 | V | D | I | H | I | V | L | L | L | W | E | -908.278 |
| '0201010105030101050110 | I | D | I | R | V | L | L | V | M | W | R | -908.271 |
| '0301040205010103010101 | L | D | V | H | V | V | L | I | V | W | H | -908.27  |

|                         |   |   |   |   |   |   |   |   |   |   |   |          |
|-------------------------|---|---|---|---|---|---|---|---|---|---|---|----------|
| '0101020102010101020104 | V | D | L | R | F | V | L | V | A | W | I | -908.265 |
| '0101030101010203040104 | V | D | M | R | L | V | A | I | L | W | I | -908.263 |
| '0101010202030301010102 | V | D | I | H | F | L | V | V | V | W | E | -908.262 |
| '0201010302040101010106 | I | D | I | K | F | M | L | V | V | W | L | -908.261 |
| '0101010201020103040111 | V | D | I | H | L | I | L | I | L | W | T | -908.261 |
| '0101010303030101070101 | V | D | I | K | I | L | L | V | T | W | H | -908.259 |
| '0101030104040101050104 | V | D | M | R | M | M | L | V | M | W | I | -908.253 |
| '0101010202010204010109 | V | D | I | H | F | V | A | L | V | W | Q | -908.253 |
| '0101010102030201030109 | V | D | I | R | F | L | A | V | I | W | Q | -908.252 |
| '0101040405040101010105 | V | D | V | Q | V | M | L | V | V | W | K | -908.251 |
| '0101040205010101020108 | V | D | V | H | V | V | L | V | A | W | N | -908.25  |
| '0101030205010101070104 | V | D | M | H | V | V | L | V | T | W | I | -908.249 |
| '0101040104020101070105 | V | D | V | R | M | I | L | V | T | W | K | -908.248 |
| '0201010102020101060111 | I | D | I | R | F | I | L | V | S | W | T | -908.248 |
| '0101010101030201040105 | V | D | I | R | L | L | A | V | L | W | K | -908.247 |
| '0101010102030104060111 | V | D | I | R | F | L | L | L | S | W | T | -908.247 |
| '0101010401010101040104 | V | D | I | Q | L | V | L | V | L | W | I | -908.245 |
| '0301010302010102010112 | L | D | I | K | F | V | L | A | V | W | V | -908.244 |
| '0101010102030103050107 | V | D | I | R | F | L | L | I | M | W | M | -908.243 |
| '0101010403030101020101 | V | D | I | Q | I | L | L | V | A | W | H | -908.24  |
| '0201010202010103050101 | I | D | I | H | F | V | L | I | M | W | H | -908.238 |
| '0101010102020201050107 | V | D | I | R | F | I | A | V | M | W | M | -908.234 |
| '0101040103020101050102 | V | D | V | R | I | I | L | V | M | W | E | -908.233 |
| '0101010201040101040112 | V | D | I | H | L | M | L | V | L | W | V | -908.233 |
| '0101030103040201010105 | V | D | M | R | I | M | A | V | V | W | K | -908.232 |
| '0101040103010104050109 | V | D | V | R | I | V | L | L | M | W | Q | -908.231 |
| '0101010103020301040111 | V | D | I | R | I | I | V | V | L | W | T | -908.231 |
| '0101010204020101010104 | V | D | I | H | M | I | L | V | V | W | I | -908.23  |
| '0301010203010104010112 | L | D | I | H | I | V | L | L | V | W | V | -908.228 |
| '0301010102010103010109 | L | D | I | R | F | V | L | I | V | W | Q | -908.223 |
| '0201030105030101060101 | I | D | M | R | V | L | L | V | S | W | H | -908.219 |
| '0201030403010101010105 | I | D | M | Q | I | V | L | V | V | W | K | -908.218 |
| '0301010202040101010102 | L | D | I | H | F | M | L | V | V | W | E | -908.217 |
| '0301010103020103010110 | L | D | I | R | I | I | L | I | V | W | R | -908.216 |
| '0101040102020101050107 | V | D | V | R | F | I | L | V | M | W | M | -908.216 |
| '0201010104030201010104 | I | D | I | R | M | L | A | V | V | W | I | -908.215 |
| '0101010105020104030111 | V | D | I | R | V | I | L | L | I | W | T | -908.214 |

|                         |   |   |   |   |   |   |   |   |   |   |   |          |
|-------------------------|---|---|---|---|---|---|---|---|---|---|---|----------|
| '0301010102010104040112 | L | D | I | R | F | V | L | L | L | W | V | -908.211 |
| '0101030102030301010110 | V | D | M | R | F | L | V | V | V | W | R | -908.211 |
| '0101010305020101010101 | V | D | I | K | V | I | L | V | V | W | H | -908.209 |
| '0101010203020201010107 | V | D | I | H | I | I | A | V | V | W | M | -908.208 |
| '0101030403030201010101 | V | D | M | Q | I | L | A | V | V | W | H | -908.205 |
| '0101040402010101040111 | V | D | V | Q | F | V | L | V | L | W | T | -908.205 |
| '0101010102020301050110 | V | D | I | R | F | I | V | V | M | W | R | -908.204 |
| '0101010302010101020110 | V | D | I | K | F | V | L | V | A | W | R | -908.204 |
| '0101040304010101030104 | V | D | V | K | M | V | L | V | I | W | I | -908.203 |
| '0101040101020103070112 | V | D | V | R | L | I | L | I | T | W | V | -908.202 |
| '0101010102030303010106 | V | D | I | R | F | L | V | I | V | W | L | -908.201 |
| '0101020201020101040110 | V | D | L | H | L | I | L | V | L | W | R | -908.199 |
| '0201010102040102010103 | I | D | I | R | F | M | L | A | V | W | F | -908.199 |
| '0101010104040101060108 | V | D | I | R | M | M | L | V | S | W | N | -908.196 |
| '0101040301020103010110 | V | D | V | K | L | I | L | I | V | W | R | -908.191 |
| '0101040201030101050103 | V | D | V | H | L | L | L | V | M | W | F | -908.189 |
| '0101020201030101070112 | V | D | L | H | L | L | L | V | T | W | V | -908.189 |
| '0201010405040101010112 | I | D | I | Q | V | M | L | V | V | W | V | -908.188 |
| '0101030205010105070101 | V | D | M | H | V | V | L | M | T | W | H | -908.188 |
| '0201040101030101030104 | I | D | V | R | L | L | L | V | I | W | I | -908.187 |
| '0201010305030101010107 | I | D | I | K | V | L | L | V | V | W | M | -908.186 |
| '0101040103010401010106 | V | D | V | R | I | V | W | V | V | W | L | -908.186 |
| '0301010205010103010112 | L | D | I | H | V | V | L | I | V | W | V | -908.185 |
| '0101010103010203040106 | V | D | I | R | I | V | A | I | L | W | L | -908.184 |
| '0101030104030101030104 | V | D | M | R | M | L | L | V | I | W | I | -908.183 |
| '0101010205030403010101 | V | D | I | H | V | L | W | I | V | W | H | -908.183 |
| '0101010103020102030112 | V | D | I | R | I | I | L | A | I | W | V | -908.177 |
| '0101020103010103030110 | V | D | L | R | I | V | L | I | I | W | R | -908.177 |
| '0201010105010101040112 | I | D | I | R | V | V | L | V | L | W | V | -908.174 |
| '0101010202030201010103 | V | D | I | H | F | L | A | V | V | W | F | -908.172 |
| '0101010305040101030101 | V | D | I | K | V | M | L | V | I | W | H | -908.17  |
| '0201010102030401010104 | I | D | I | R | F | L | W | V | V | W | I | -908.168 |
| '0101010301020101040104 | V | D | I | K | L | I | L | V | L | W | I | -908.165 |
| '0101040402010105040101 | V | D | V | Q | F | V | L | M | L | W | H | -908.165 |
| '0101010105010203040105 | V | D | I | R | V | V | A | I | L | W | K | -908.165 |
| '0101020105010103030105 | V | D | L | R | V | V | L | I | I | W | K | -908.165 |
| '0101010203010101010107 | V | D | I | H | I | V | L | V | V | W | M | -908.165 |

|                         |   |   |   |   |   |   |   |   |   |   |   |          |
|-------------------------|---|---|---|---|---|---|---|---|---|---|---|----------|
| '0101010105030104030106 | V | D | I | R | V | L | L | L | I | W | L | -908.164 |
| '0101010105010204030104 | V | D | I | R | V | V | A | L | I | W | I | -908.163 |
| '0101030105020201010107 | V | D | M | R | V | I | A | V | V | W | M | -908.162 |
| '0301010205010105010105 | L | D | I | H | V | V | L | M | V | W | K | -908.161 |
| '0301010102020101050106 | L | D | I | R | F | I | L | V | M | W | L | -908.16  |
| '0101030101020103040106 | V | D | M | R | L | I | L | I | L | W | L | -908.16  |
| '0101010203010104030101 | V | D | I | H | I | V | L | L | I | W | H | -908.159 |
| '0101040402010101030105 | V | D | V | Q | F | V | L | V | I | W | K | -908.159 |
| '0101030103010403010108 | V | D | M | R | I | V | W | I | V | W | N | -908.159 |
| '0101020302010101040108 | V | D | L | K | F | V | L | V | L | W | N | -908.157 |
| '0101030102030301040101 | V | D | M | R | F | L | V | V | L | W | H | -908.154 |
| '0201010101030103070112 | I | D | I | R | L | L | L | I | T | W | V | -908.152 |
| '0101030102010403010105 | V | D | M | R | F | V | W | I | V | W | K | -908.151 |
| '0101010403030101010102 | V | D | I | Q | I | L | L | V | V | W | E | -908.151 |
| '0101020105010104040112 | V | D | L | R | V | V | L | L | L | W | V | -908.149 |
| '0201010105020104010105 | I | D | I | R | V | I | L | L | V | W | K | -908.149 |
| '0101010402040101040108 | V | D | I | Q | F | M | L | V | L | W | N | -908.147 |
| '0301030205010101010110 | L | D | M | H | V | V | L | V | V | W | R | -908.144 |
| '0101030104030101040105 | V | D | M | R | M | L | L | V | L | W | K | -908.144 |
| '0101040105010403070101 | V | D | V | R | V | V | W | I | T | W | H | -908.143 |
| '0301040105010103010102 | L | D | V | R | V | V | L | I | V | W | E | -908.141 |
| '0201010401030101010101 | I | D | I | Q | L | L | L | V | V | W | H | -908.14  |
| '0101040102010104070103 | V | D | V | R | F | V | L | L | T | W | F | -908.14  |
| '0201040104040101010107 | I | D | V | R | M | M | L | V | V | W | M | -908.138 |
| '0101040201020103050101 | V | D | V | H | L | I | L | I | M | W | H | -908.137 |
| '0101010102010105070111 | V | D | I | R | F | V | L | M | T | W | T | -908.135 |
| '0101010103010104030110 | V | D | I | R | I | V | L | L | I | W | R | -908.134 |
| '0101010102010304040112 | V | D | I | R | F | V | V | L | L | W | V | -908.13  |
| '0101010402030101060108 | V | D | I | Q | F | L | L | V | S | W | N | -908.127 |
| '0101040102010203010104 | V | D | V | R | F | V | A | I | V | W | I | -908.127 |
| '0101030105010105010108 | V | D | M | R | V | V | L | M | V | W | N | -908.126 |
| '0101010203040103040101 | V | D | I | H | I | M | L | I | L | W | H | -908.124 |
| '0101010405030101030101 | V | D | I | Q | V | L | L | V | I | W | H | -908.123 |
| '0101030101020101070101 | V | D | M | R | L | I | L | V | T | W | H | -908.123 |
| '0301020102010104010106 | L | D | L | R | F | V | L | L | V | W | L | -908.12  |
| '0201040305010101070101 | I | D | V | K | V | V | L | V | T | W | H | -908.12  |
| '0101010403030401010112 | V | D | I | Q | I | L | W | V | V | W | V | -908.12  |



|                         |   |   |   |   |   |   |   |   |   |   |   |          |
|-------------------------|---|---|---|---|---|---|---|---|---|---|---|----------|
| '0201040103010105010107 | I | D | V | R | I | V | L | M | V | W | M | -908.119 |
| '0201040101030101010105 | I | D | V | R | L | L | L | V | V | W | K | -908.118 |
| '0101010305020101040102 | V | D | I | K | V | I | L | V | L | W | E | -908.118 |
| '0101020104010103020108 | V | D | L | R | M | V | L | I | A | W | N | -908.113 |
| '0101010304010103030105 | V | D | I | K | M | V | L | I | I | W | K | -908.112 |
| '0101040104010104040108 | V | D | V | R | M | V | L | L | L | W | N | -908.11  |
| '0101020201010103040104 | V | D | L | H | L | V | L | I | L | W | I | -908.11  |
| '0301010102010102010108 | L | D | I | R | F | V | L | A | V | W | N | -908.109 |
| '0101010203010103010108 | V | D | I | H | I | V | L | I | V | W | N | -908.107 |
| '0101010102010205040106 | V | D | I | R | F | V | A | M | L | W | L | -908.106 |
| '0201040101040101070106 | I | D | V | R | L | M | L | V | T | W | L | -908.106 |
| '0301010105020202010101 | L | D | I | R | V | I | A | A | V | W | H | -908.105 |
| '0101020105010103020111 | V | D | L | R | V | V | L | I | A | W | T | -908.102 |
| '0101010202020301010107 | V | D | I | H | F | I | V | V | V | W | M | -908.101 |
| '0101040402010101010103 | V | D | V | Q | F | V | L | V | V | W | F | -908.1   |
| '0201030105010201010104 | I | D | M | R | V | V | A | V | V | W | I | -908.1   |
| '0101010104020101010108 | V | D | I | R | M | I | L | V | V | W | N | -908.093 |
| '0101040103040102070101 | V | D | V | R | I | M | L | A | T | W | H | -908.089 |
| '0101030402040101020101 | V | D | M | Q | F | M | L | V | A | W | H | -908.088 |
| '0201040102020201010101 | I | D | V | R | F | I | A | V | V | W | H | -908.086 |
| '0101020104020103010103 | V | D | L | R | M | I | L | I | V | W | F | -908.085 |
| '0101010205010101040108 | V | D | I | H | V | V | L | V | L | W | N | -908.084 |
| '0101010405040101030112 | V | D | I | Q | V | M | L | V | I | W | V | -908.082 |
| '0101010105010103050106 | V | D | I | R | V | V | L | I | M | W | L | -908.08  |
| '0101030105030201040101 | V | D | M | R | V | L | A | V | L | W | H | -908.079 |
| '0101040101020104010108 | V | D | V | R | L | I | L | L | V | W | N | -908.079 |
| '0101040303010101040102 | V | D | V | K | I | V | L | V | L | W | E | -908.079 |
| '0301010405010101010101 | L | D | I | Q | V | V | L | V | V | W | H | -908.074 |
| '0101010102010404070106 | V | D | I | R | F | V | W | L | T | W | L | -908.072 |
| '0201010103010105040112 | I | D | I | R | I | V | L | M | L | W | V | -908.071 |
| '0101040102010105020107 | V | D | V | R | F | V | L | M | A | W | M | -908.069 |
| '0201010102040101050107 | I | D | I | R | F | M | L | V | M | W | M | -908.068 |
| '0101040101030101010103 | V | D | V | R | L | L | L | V | V | W | F | -908.068 |
| '0101010205040101020112 | V | D | I | H | V | M | L | V | A | W | V | -908.063 |
| '0101010203020102040101 | V | D | I | H | I | I | L | A | L | W | H | -908.063 |
| '0201030102030101030101 | I | D | M | R | F | L | L | V | I | W | H | -908.061 |
| '0201010203010103010105 | I | D | I | H | I | V | L | I | V | W | K | -908.059 |

|                         |   |   |   |   |   |   |   |   |   |   |   |          |
|-------------------------|---|---|---|---|---|---|---|---|---|---|---|----------|
| '0101030105010104060105 | V | D | M | R | V | V | L | L | S | W | K | -908.058 |
| '0101010102010104020111 | V | D | I | R | F | V | L | L | A | W | T | -908.058 |
| '0101020103030101050105 | V | D | L | R | I | L | L | V | M | W | K | -908.055 |
| '0301030102010101010105 | L | D | M | R | F | V | L | V | V | W | K | -908.054 |
| '0101030403010101050110 | V | D | M | Q | I | V | L | V | M | W | R | -908.052 |
| '0301040105010101070107 | L | D | V | R | V | V | L | V | T | W | M | -908.052 |
| '0101020202010101010111 | V | D | L | H | F | V | L | V | V | W | T | -908.047 |
| '0101040203010101040112 | V | D | V | H | I | V | L | V | L | W | V | -908.046 |
| '0101030101020201040112 | V | D | M | R | L | I | A | V | L | W | V | -908.046 |
| '0101020102020301040101 | V | D | L | R | F | I | V | V | L | W | H | -908.046 |
| '0101010103010105040110 | V | D | I | R | I | V | L | M | L | W | R | -908.043 |
| '0101030105010102050106 | V | D | M | R | V | V | L | A | M | W | L | -908.041 |
| '0301010102010104070111 | L | D | I | R | F | V | L | L | T | W | T | -908.039 |
| '0101010202020401020101 | V | D | I | H | F | I | W | V | A | W | H | -908.038 |
| '0101010302010203060101 | V | D | I | K | F | V | A | I | S | W | H | -908.035 |
| '0301030201020101010106 | L | D | M | H | L | I | L | V | V | W | L | -908.034 |
| '0101030401020101040112 | V | D | M | Q | L | I | L | V | L | W | V | -908.029 |
| '0301010202020101070101 | L | D | I | H | F | I | L | V | T | W | H | -908.028 |
| '0101010104030103040105 | V | D | I | R | M | L | L | I | L | W | K | -908.026 |
| '0301010102030105010105 | L | D | I | R | F | L | L | M | V | W | K | -908.023 |
| '0101040205010301010104 | V | D | V | H | V | V | V | V | V | W | I | -908.023 |
| '0101010102030102030112 | V | D | I | R | F | L | L | A | I | W | V | -908.023 |
| '0101040402010201040101 | V | D | V | Q | F | V | A | V | L | W | H | -908.019 |
| '0201030103010103020101 | I | D | M | R | I | V | L | I | A | W | H | -908.016 |
| '0101040103040102010112 | V | D | V | R | I | M | L | A | V | W | V | -908.014 |
| '0101030105030102070101 | V | D | M | R | V | L | L | A | T | W | H | -908.014 |
| '0101010103040101020108 | V | D | I | R | I | M | L | V | A | W | N | -908.014 |
| '0301040105010101060105 | L | D | V | R | V | V | L | V | S | W | K | -908.013 |
| '0301010102010101050110 | L | D | I | R | F | V | L | V | M | W | R | -908.013 |
| '0101010402030301070101 | V | D | I | Q | F | L | V | V | T | W | H | -908.013 |
| '0201030103030101070101 | I | D | M | R | I | L | L | V | T | W | H | -908.012 |
| '0201010205010104010112 | I | D | I | H | V | V | L | L | V | W | V | -908.011 |
| '0201030202010101010110 | I | D | M | H | F | V | L | V | V | W | R | -908.011 |
| '0201010102010301040110 | I | D | I | R | F | V | V | V | L | W | R | -908.011 |
| '0101030205010104060101 | V | D | M | H | V | V | L | L | S | W | H | -908.01  |
| '0101010404030101040111 | V | D | I | Q | M | L | L | V | L | W | T | -908.009 |
| '0101010402030301010106 | V | D | I | Q | F | L | V | V | V | W | L | -908.007 |

|                         |   |   |   |   |   |   |   |   |   |   |   |          |
|-------------------------|---|---|---|---|---|---|---|---|---|---|---|----------|
| '0201010305030101050101 | I | D | I | K | V | L | L | V | M | W | H | -908.003 |
| '0101040401020103070101 | V | D | V | Q | L | I | L | I | T | W | H | -907.999 |
| '0101010103040103040112 | V | D | I | R | I | M | L | I | L | W | V | -907.997 |
| '0101040104010304010101 | V | D | V | R | M | V | V | L | V | W | H | -907.997 |
| '0201010203030101070101 | I | D | I | H | I | L | L | V | T | W | H | -907.996 |
| '0301030103010101020104 | L | D | M | R | I | V | L | V | A | W | I | -907.995 |
| '0101030104040101040102 | V | D | M | R | M | M | L | V | L | W | E | -907.994 |
| '0101010405010101030106 | V | D | I | Q | V | V | L | V | I | W | L | -907.992 |
| '0301030105010104010110 | L | D | M | R | V | V | L | L | V | W | R | -907.991 |
| '0101010202030201030101 | V | D | I | H | F | L | A | V | I | W | H | -907.99  |
| '0101030102010201020102 | V | D | M | R | F | V | A | V | A | W | E | -907.99  |
| '0101040104010104010110 | V | D | V | R | M | V | L | L | V | W | R | -907.99  |
| '0101010405010103040109 | V | D | I | Q | V | V | L | I | L | W | Q | -907.986 |
| '0101030105010103070112 | V | D | M | R | V | V | L | I | T | W | V | -907.982 |
| '0101010105010104060112 | V | D | I | R | V | V | L | L | S | W | V | -907.982 |
| '0101030103020301020101 | V | D | M | R | I | I | V | V | A | W | H | -907.981 |
| '0101020201010103070101 | V | D | L | H | L | V | L | I | T | W | H | -907.981 |
| '0101040105010101010109 | V | D | V | R | V | V | L | V | V | W | Q | -907.98  |
| '0101030202010105010108 | V | D | M | H | F | V | L | M | V | W | N | -907.979 |
| '0101010201010103030109 | V | D | I | H | L | V | L | I | I | W | Q | -907.975 |
| '0201040203010101060101 | I | D | V | H | I | V | L | V | S | W | H | -907.974 |
| '0101010105020301010109 | V | D | I | R | V | I | V | V | V | W | Q | -907.968 |
| '0301010205010101040111 | L | D | I | H | V | V | L | V | L | W | T | -907.964 |
| '0301010105020401010105 | L | D | I | R | V | I | W | V | V | W | K | -907.961 |
| '0101010405010104030104 | V | D | I | Q | V | V | L | L | I | W | I | -907.961 |
| '0101010405020104010107 | V | D | I | Q | V | I | L | L | V | W | M | -907.958 |
| '0201030104010101040110 | I | D | M | R | M | V | L | V | L | W | R | -907.958 |
| '0201010104020101040104 | I | D | I | R | M | I | L | V | L | W | I | -907.958 |
| '0101010102020105070105 | V | D | I | R | F | I | L | M | T | W | K | -907.957 |
| '0101030203010403010101 | V | D | M | H | I | V | W | I | V | W | H | -907.955 |
| '0301010303020101010104 | L | D | I | K | I | I | L | V | V | W | I | -907.954 |
| '0101010304020101050105 | V | D | I | K | M | I | L | V | M | W | K | -907.952 |
| '0201010104010105040105 | I | D | I | R | M | V | L | M | L | W | K | -907.95  |
| '0101010202030101020102 | V | D | I | H | F | L | L | V | A | W | E | -907.949 |
| '0101010203010101070112 | V | D | I | H | I | V | L | V | T | W | V | -907.948 |
| '0101030302010105010101 | V | D | M | K | F | V | L | M | V | W | H | -907.947 |
| '0101010102030202010106 | V | D | I | R | F | L | A | A | V | W | L | -907.942 |

|                         |   |   |   |   |   |   |   |   |   |   |   |          |
|-------------------------|---|---|---|---|---|---|---|---|---|---|---|----------|
| '0101010403020101070112 | V | D | I | Q | I | I | L | V | T | W | V | -907.941 |
| '0101010103020201010104 | V | D | I | R | I | I | A | V | V | W | I | -907.939 |
| '0101010104030101010105 | V | D | I | R | M | L | L | V | V | W | K | -907.939 |
| '0101030303010101070102 | V | D | M | K | I | V | L | V | T | W | E | -907.937 |
| '0201030105040101010112 | I | D | M | R | V | M | L | V | V | W | V | -907.935 |
| '0101030103010102040110 | V | D | M | R | I | V | L | A | L | W | R | -907.935 |
| '0101040105030105010104 | V | D | V | R | V | L | L | M | V | W | I | -907.931 |
| '0101030402010101030106 | V | D | M | Q | F | V | L | V | I | W | L | -907.929 |
| '0101020102020103030101 | V | D | L | R | F | I | L | I | I | W | H | -907.928 |
| '0101010201040103040106 | V | D | I | H | L | M | L | I | L | W | L | -907.928 |
| '0101040303030104010101 | V | D | V | K | I | L | L | L | V | W | H | -907.928 |
| '0201030201020101010103 | I | D | M | H | L | I | L | V | V | W | F | -907.927 |
| '0101030204030101010103 | V | D | M | H | M | L | L | V | V | W | F | -907.926 |
| '0101010302030301010108 | V | D | I | K | F | L | V | V | V | W | N | -907.925 |
| '0101040103010105030108 | V | D | V | R | I | V | L | M | I | W | N | -907.924 |
| '0101030103030102010108 | V | D | M | R | I | L | L | A | V | W | N | -907.922 |
| '0201010102020101050102 | I | D | I | R | F | I | L | V | M | W | E | -907.922 |
| '0301010102010102030110 | L | D | I | R | F | V | L | A | I | W | R | -907.921 |
| '0201010105010203010102 | I | D | I | R | V | V | A | I | V | W | E | -907.92  |
| '0101040404030101010108 | V | D | V | Q | M | L | L | V | V | W | N | -907.919 |
| '0101010103020201070101 | V | D | I | R | I | I | A | V | T | W | H | -907.918 |
| '0301030102040101010112 | L | D | M | R | F | M | L | V | V | W | V | -907.917 |
| '0101010302010104070101 | V | D | I | K | F | V | L | L | T | W | H | -907.916 |
| '0201010103010303010105 | I | D | I | R | I | V | V | I | V | W | K | -907.914 |
| '0101020101030101040108 | V | D | L | R | L | L | L | V | L | W | N | -907.914 |
| '0101030105010303040101 | V | D | M | R | V | V | V | I | L | W | H | -907.914 |
| '0101010202010303070101 | V | D | I | H | F | V | V | I | T | W | H | -907.913 |
| '0301010202010102010111 | L | D | I | H | F | V | L | A | V | W | T | -907.912 |
| '0101010104030104020111 | V | D | I | R | M | L | L | L | A | W | T | -907.912 |
| '0101040201010105040106 | V | D | V | H | L | V | L | M | L | W | L | -907.91  |
| '0201010101030102040112 | I | D | I | R | L | L | L | A | L | W | V | -907.909 |
| '0101010102010404010112 | V | D | I | R | F | V | W | L | V | W | V | -907.908 |
| '0101010203020101060105 | V | D | I | H | I | I | L | V | S | W | K | -907.906 |
| '0101030403010201010104 | V | D | M | Q | I | V | A | V | V | W | I | -907.904 |
| '0101010105030201030101 | V | D | I | R | V | L | A | V | I | W | H | -907.9   |
| '0301030205010104010101 | L | D | M | H | V | V | L | L | V | W | H | -907.9   |
| '0101040405040101040101 | V | D | V | Q | V | M | L | V | L | W | H | -907.899 |

|                         |   |   |   |   |   |   |   |   |   |   |   |          |
|-------------------------|---|---|---|---|---|---|---|---|---|---|---|----------|
| '0101010102020103050108 | V | D | I | R | F | I | L | I | M | W | N | -907.898 |
| '0101040204010101050105 | V | D | V | H | M | V | L | V | M | W | K | -907.895 |
| '0101030104020101010104 | V | D | M | R | M | I | L | V | V | W | I | -907.893 |
| '0301040105010101030104 | L | D | V | R | V | V | L | V | I | W | I | -907.889 |
| '0201010202010101030105 | I | D | I | H | F | V | L | V | I | W | K | -907.887 |
| '0201040103010102010110 | I | D | V | R | I | V | L | A | V | W | R | -907.886 |
| '0101010105010201050109 | V | D | I | R | V | V | A | V | M | W | Q | -907.883 |
| '0201030105030101010107 | I | D | M | R | V | L | L | V | V | W | M | -907.88  |
| '0201010103020102010105 | I | D | I | R | I | I | L | A | V | W | K | -907.877 |
| '0101030201010103030112 | V | D | M | H | L | V | L | I | I | W | V | -907.875 |
| '0201010103010101010112 | I | D | I | R | I | V | L | V | V | W | V | -907.874 |
| '0201020105020101010103 | I | D | L | R | V | I | L | V | V | W | F | -907.873 |
| '0101040102040101040109 | V | D | V | R | F | M | L | V | L | W | Q | -907.873 |
| '0101020102020101060107 | V | D | L | R | F | I | L | V | S | W | M | -907.873 |
| '0201030201020101040101 | I | D | M | H | L | I | L | V | L | W | H | -907.871 |
| '0101010102010102070105 | V | D | I | R | F | V | L | A | T | W | K | -907.869 |
| '0201030105010104010112 | I | D | M | R | V | V | L | L | V | W | V | -907.869 |
| '0101010105010201070101 | V | D | I | R | V | V | A | V | T | W | H | -907.869 |
| '0301010202010103010105 | L | D | I | H | F | V | L | I | V | W | K | -907.869 |
| '0101010105020101060103 | V | D | I | R | V | I | L | V | S | W | F | -907.868 |
| '0101010104020101040110 | V | D | I | R | M | I | L | V | L | W | R | -907.868 |
| '0101010102020402010110 | V | D | I | R | F | I | W | A | V | W | R | -907.868 |
| '0101010404020101030104 | V | D | I | Q | M | I | L | V | I | W | I | -907.868 |
| '0101010203030101040103 | V | D | I | H | I | L | L | V | L | W | F | -907.867 |
| '0101010103030301030108 | V | D | I | R | I | L | V | V | I | W | N | -907.866 |
| '0101040301030101050105 | V | D | V | K | L | L | L | V | M | W | K | -907.862 |
| '0201010102020202010101 | I | D | I | R | F | I | A | A | V | W | H | -907.862 |
| '0101010104040103040106 | V | D | I | R | M | M | L | I | L | W | L | -907.859 |
| '0101030404040101010110 | V | D | M | Q | M | M | L | V | V | W | R | -907.859 |
| '0201030405010101010112 | I | D | M | Q | V | V | L | V | V | W | V | -907.859 |
| '0201010202040103010101 | I | D | I | H | F | M | L | I | V | W | H | -907.855 |
| '0201040101020103010108 | I | D | V | R | L | I | L | I | V | W | N | -907.854 |
| '0101010103010304040105 | V | D | I | R | I | V | V | L | L | W | K | -907.854 |
| '0101010103020103050106 | V | D | I | R | I | I | L | I | M | W | L | -907.851 |
| '0101010103020203010105 | V | D | I | R | I | I | A | I | V | W | K | -907.851 |
| '0101010102030403010112 | V | D | I | R | F | L | W | I | V | W | V | -907.849 |
| '0101010203010102040108 | V | D | I | H | I | V | L | A | L | W | N | -907.848 |

|                         |   |   |   |   |   |   |   |   |   |   |   |          |
|-------------------------|---|---|---|---|---|---|---|---|---|---|---|----------|
| '0101010103010203010110 | V | D | I | R | I | V | A | I | V | W | R | -907.848 |
| '0101010302040102020101 | V | D | I | K | F | M | L | A | A | W | H | -907.847 |
| '0101030302010101070111 | V | D | M | K | F | V | L | V | T | W | T | -907.847 |
| '0101020102020103010111 | V | D | L | R | F | I | L | I | V | W | T | -907.845 |
| '0101020105020201010112 | V | D | L | R | V | I | A | V | V | W | V | -907.841 |
| '0101040102010101060104 | V | D | V | R | F | V | L | V | S | W | I | -907.84  |
| '0301010103020101070109 | L | D | I | R | I | I | L | V | T | W | Q | -907.838 |
| '0101030102010105070108 | V | D | M | R | F | V | L | M | T | W | N | -907.838 |
| '0301010105020103030101 | L | D | I | R | V | I | L | I | I | W | H | -907.835 |
| '0201010103010105070108 | I | D | I | R | I | V | L | M | T | W | N | -907.833 |
| '0301010103020104020101 | L | D | I | R | I | I | L | L | A | W | H | -907.833 |
| '0101030102010101010110 | V | D | M | R | F | V | L | V | V | W | R | -907.829 |
| '0101020103020101070102 | V | D | L | R | I | I | L | V | T | W | E | -907.829 |
| '0201010105010102030105 | I | D | I | R | V | V | L | A | I | W | K | -907.828 |
| '0101010103020203060101 | V | D | I | R | I | I | A | I | S | W | H | -907.825 |
| '0301040103010101050101 | L | D | V | R | I | V | L | V | M | W | H | -907.824 |
| '0101040104030103010110 | V | D | V | R | M | L | L | I | V | W | R | -907.824 |
| '0101010102030104020105 | V | D | I | R | F | L | L | L | A | W | K | -907.82  |
| '0301010105010103040104 | L | D | I | R | V | V | L | I | L | W | I | -907.819 |
| '0201010102040101020108 | I | D | I | R | F | M | L | V | A | W | N | -907.819 |
| '0101040102010204050101 | V | D | V | R | F | V | A | L | M | W | H | -907.818 |
| '0101030302030401010101 | V | D | M | K | F | L | W | V | V | W | H | -907.815 |
| '0101040201020101020111 | V | D | V | H | L | I | L | V | A | W | T | -907.814 |
| '0301010105030102010101 | L | D | I | R | V | L | L | A | V | W | H | -907.814 |
| '0101030304040101040101 | V | D | M | K | M | M | L | V | L | W | H | -907.813 |
| '0101040204010101020107 | V | D | V | H | M | V | L | V | A | W | M | -907.809 |
| '0101010102030104070107 | V | D | I | R | F | L | L | L | T | W | M | -907.809 |
| '0101010403010101030104 | V | D | I | Q | I | V | L | V | I | W | I | -907.806 |
| '0101010102020301030106 | V | D | I | R | F | I | V | V | I | W | L | -907.806 |
| '0101010203030401010102 | V | D | I | H | I | L | W | V | V | W | E | -907.806 |
| '0101010203010104060110 | V | D | I | H | I | V | L | L | S | W | R | -907.805 |
| '0101010204010403010104 | V | D | I | H | M | V | W | I | V | W | I | -907.801 |
| '0101040203010401010104 | V | D | V | H | I | V | W | V | V | W | I | -907.8   |
| '0101040101020104020105 | V | D | V | R | L | I | L | L | A | W | K | -907.799 |
| '0301040201020101010111 | L | D | V | H | L | I | L | V | V | W | T | -907.799 |
| '0101030102010201010108 | V | D | M | R | F | V | A | V | V | W | N | -907.797 |
| '0101010401020101040109 | V | D | I | Q | L | I | L | V | L | W | Q | -907.797 |

|                         |   |   |   |   |   |   |   |   |   |   |   |          |
|-------------------------|---|---|---|---|---|---|---|---|---|---|---|----------|
| '0101010102040201030112 | V | D | I | R | F | M | A | V | I | W | V | -907.796 |
| '0101010403010103010103 | V | D | I | Q | I | V | L | I | V | W | F | -907.796 |
| '0101010403020101050108 | V | D | I | Q | I | I | L | V | M | W | N | -907.795 |
| '0101010105040102020101 | V | D | I | R | V | M | L | A | A | W | H | -907.794 |
| '0101030202010301070101 | V | D | M | H | F | V | V | V | T | W | H | -907.793 |
| '0301040105030101010106 | L | D | V | R | V | L | L | V | V | W | L | -907.792 |
| '0101010203010204010105 | V | D | I | H | I | V | A | L | V | W | K | -907.792 |
| '0301040104010101040110 | L | D | V | R | M | V | L | V | L | W | R | -907.788 |
| '0301040103040101010101 | L | D | V | R | I | M | L | V | V | W | H | -907.788 |
| '0301010302010104010106 | L | D | I | K | F | V | L | L | V | W | L | -907.787 |
| '0101030402010101070109 | V | D | M | Q | F | V | L | V | T | W | Q | -907.787 |
| '0101030102010103060110 | V | D | M | R | F | V | L | I | S | W | R | -907.786 |
| '0301040102010105010112 | L | D | V | R | F | V | L | M | V | W | V | -907.786 |
| '0201040105010104020101 | I | D | V | R | V | V | L | L | A | W | H | -907.786 |
| '0101020101030101010111 | V | D | L | R | L | L | L | V | V | W | T | -907.784 |
| '0101010105030304010104 | V | D | I | R | V | L | V | L | V | W | I | -907.783 |
| '0101040104020105010102 | V | D | V | R | M | I | L | M | V | W | E | -907.783 |
| '0101030103010303010104 | V | D | M | R | I | V | V | I | V | W | I | -907.783 |
| '0201010103020101060105 | I | D | I | R | I | I | L | V | S | W | K | -907.782 |
| '0101040204040101010112 | V | D | V | H | M | M | L | V | V | W | V | -907.782 |
| '0101010103040301040101 | V | D | I | R | I | M | V | V | L | W | H | -907.781 |
| '0101020102030103070101 | V | D | L | R | F | L | L | I | T | W | H | -907.779 |
| '0201010103020101040108 | I | D | I | R | I | I | L | V | L | W | N | -907.778 |
| '0101010103010104050108 | V | D | I | R | I | V | L | L | M | W | N | -907.776 |
| '0101040302010102010110 | V | D | V | K | F | V | L | A | V | W | R | -907.774 |
| '0101010103040201040105 | V | D | I | R | I | M | A | V | L | W | K | -907.773 |
| '0101010204010101010105 | V | D | I | H | M | V | L | V | V | W | K | -907.773 |
| '0301040403010101010105 | L | D | V | Q | I | V | L | V | V | W | K | -907.77  |
| '0101010204010103020105 | V | D | I | H | M | V | L | I | A | W | K | -907.769 |
| '0101010204020103010105 | V | D | I | H | M | I | L | I | V | W | K | -907.768 |
| '0301040103010101070112 | L | D | V | R | I | V | L | V | T | W | V | -907.767 |
| '0101010103030101020110 | V | D | I | R | I | L | L | V | A | W | R | -907.765 |
| '0101030302010101030110 | V | D | M | K | F | V | L | V | I | W | R | -907.764 |
| '0101010302020105010109 | V | D | I | K | F | I | L | M | V | W | Q | -907.763 |
| '0101010103010403040105 | V | D | I | R | I | V | W | I | L | W | K | -907.763 |
| '0101010202010203010105 | V | D | I | H | F | V | A | I | V | W | K | -907.762 |
| '0301020105010101020104 | L | D | L | R | V | V | L | V | A | W | I | -907.761 |

|                         |   |   |   |   |   |   |   |   |   |   |   |          |
|-------------------------|---|---|---|---|---|---|---|---|---|---|---|----------|
| '0201010101030301040105 | I | D | I | R | L | L | V | V | L | W | K | -907.761 |
| '0101040204020101010106 | V | D | V | H | M | I | L | V | V | W | L | -907.76  |
| '0101040403020101060101 | V | D | V | Q | I | I | L | V | S | W | H | -907.76  |
| '0101030102010104030102 | V | D | M | R | F | V | L | L | I | W | E | -907.759 |
| '0101010102030301050109 | V | D | I | R | F | L | V | V | M | W | Q | -907.758 |
| '0101040404010104010103 | V | D | V | Q | M | V | L | L | V | W | F | -907.757 |
| '0101020105030101020108 | V | D | L | R | V | L | L | V | A | W | N | -907.757 |
| '0101030103040103010109 | V | D | M | R | I | M | L | I | V | W | Q | -907.756 |
| '0301010102010101020104 | L | D | I | R | F | V | L | V | A | W | I | -907.755 |
| '0101030103030102040101 | V | D | M | R | I | L | L | A | L | W | H | -907.755 |
| '0201010304010105010106 | I | D | I | K | M | V | L | M | V | W | L | -907.754 |
| '0101040104010104060101 | V | D | V | R | M | V | L | L | S | W | H | -907.753 |
| '0101040103010101010112 | V | D | V | R | I | V | L | V | V | W | V | -907.747 |
| '0101010203030304010101 | V | D | I | H | I | L | V | L | V | W | H | -907.747 |
| '0101040105010401010108 | V | D | V | R | V | V | W | V | V | W | N | -907.746 |
| '0101010104010104040110 | V | D | I | R | M | V | L | L | L | W | R | -907.744 |
| '0101040101010104010109 | V | D | V | R | L | V | L | L | V | W | Q | -907.742 |
| '0201010105040101050108 | I | D | I | R | V | M | L | V | M | W | N | -907.739 |
| '0201030102040101040101 | I | D | M | R | F | M | L | V | L | W | H | -907.739 |
| '0301010402010104010112 | L | D | I | Q | F | V | L | L | V | W | V | -907.739 |
| '0101010102030104050108 | V | D | I | R | F | L | L | L | M | W | N | -907.738 |
| '0101030105010104050112 | V | D | M | R | V | V | L | L | M | W | V | -907.733 |
| '0101010103020403040101 | V | D | I | R | I | I | W | I | L | W | H | -907.731 |
| '0101010102010403030106 | V | D | I | R | F | V | W | I | I | W | L | -907.729 |
| '0101040103040101070105 | V | D | V | R | I | M | L | V | T | W | K | -907.729 |
| '0101020101020103040108 | V | D | L | R | L | I | L | I | L | W | N | -907.728 |
| '0101010105010104010103 | V | D | I | R | V | V | L | L | V | W | F | -907.727 |
| '0201040103030102010101 | I | D | V | R | I | L | L | A | V | W | H | -907.727 |
| '0101030103040101010102 | V | D | M | R | I | M | L | V | V | W | E | -907.725 |
| '0101020102030303010101 | V | D | L | R | F | L | V | I | V | W | H | -907.725 |
| '0301030102020102010101 | L | D | M | R | F | I | L | A | V | W | H | -907.722 |
| '0201030102010303010101 | I | D | M | R | F | V | V | I | V | W | H | -907.719 |
| '0101040302010203010101 | V | D | V | K | F | V | A | I | V | W | H | -907.719 |
| '0101040101010101030106 | V | D | V | R | L | V | L | V | I | W | L | -907.715 |
| '0101030402010204010101 | V | D | M | Q | F | V | A | L | V | W | H | -907.714 |
| '0101010302020203010101 | V | D | I | K | F | I | A | I | V | W | H | -907.712 |
| '0101020304010103010111 | V | D | L | K | M | V | L | I | V | W | T | -907.709 |



|                         |   |   |   |   |   |   |   |   |   |   |   |          |
|-------------------------|---|---|---|---|---|---|---|---|---|---|---|----------|
| '0201020105010105010110 | I | D | L | R | V | V | L | M | V | W | R | -907.708 |
| '0101020201020101030105 | V | D | L | H | L | I | L | V | I | W | K | -907.704 |
| '0201030101020101040110 | I | D | M | R | L | I | L | V | L | W | R | -907.703 |
| '0301010102040101020101 | L | D | I | R | F | M | L | V | A | W | H | -907.701 |
| '0101040102030401050101 | V | D | V | R | F | L | W | V | M | W | H | -907.698 |
| '0301010203010103010109 | L | D | I | H | I | V | L | I | V | W | Q | -907.698 |
| '0101020102020401010105 | V | D | L | R | F | I | W | V | V | W | K | -907.696 |
| '0301010102010202010112 | L | D | I | R | F | V | A | A | V | W | V | -907.696 |
| '0301010204040101010104 | L | D | I | H | M | M | L | V | V | W | I | -907.692 |
| '0201020102030101010104 | I | D | L | R | F | L | L | V | V | W | I | -907.69  |
| '0301010201020101020108 | L | D | I | H | L | I | L | V | A | W | N | -907.689 |
| '0201010105010101030110 | I | D | I | R | V | V | L | V | I | W | R | -907.688 |
| '0101010103030103020111 | V | D | I | R | I | L | L | I | A | W | T | -907.688 |
| '0201010203010101060110 | I | D | I | H | I | V | L | V | S | W | R | -907.687 |
| '0101010105030103070108 | V | D | I | R | V | L | L | I | T | W | N | -907.687 |
| '0101030103010304010109 | V | D | M | R | I | V | V | L | V | W | Q | -907.686 |
| '0201010103010402010101 | I | D | I | R | I | V | W | A | V | W | H | -907.685 |
| '0101010105020105010101 | V | D | I | R | V | I | L | M | V | W | H | -907.685 |
| '0101040302010105020101 | V | D | V | K | F | V | L | M | A | W | H | -907.684 |
| '0101020102030104010110 | V | D | L | R | F | L | L | L | V | W | R | -907.683 |
| '0101010102040203010106 | V | D | I | R | F | M | A | I | V | W | L | -907.682 |
| '0101010102020401020111 | V | D | I | R | F | I | W | V | A | W | T | -907.682 |
| '0101030305030104010101 | V | D | M | K | V | L | L | L | V | W | H | -907.68  |
| '0301040105010105010108 | L | D | V | R | V | V | L | M | V | W | N | -907.679 |
| '0301030103010104010104 | L | D | M | R | I | V | L | L | V | W | I | -907.679 |
| '0101010202010401020105 | V | D | I | H | F | V | W | V | A | W | K | -907.676 |
| '0101010102010303070106 | V | D | I | R | F | V | V | I | T | W | L | -907.675 |
| '0101040103010205010112 | V | D | V | R | I | V | A | M | V | W | V | -907.675 |
| '0101040105010404010105 | V | D | V | R | V | V | W | L | V | W | K | -907.673 |
| '0101040103030102010103 | V | D | V | R | I | L | L | A | V | W | F | -907.672 |
| '0201010205030101030101 | I | D | I | H | V | L | L | V | I | W | H | -907.671 |
| '0101010402040103010111 | V | D | I | Q | F | M | L | I | V | W | T | -907.671 |
| '0101030103040103070101 | V | D | M | R | I | M | L | I | T | W | H | -907.668 |
| '0101040105040101030109 | V | D | V | R | V | M | L | V | I | W | Q | -907.667 |
| '0301010305010101010112 | L | D | I | K | V | V | L | V | V | W | V | -907.666 |
| '0101010305030101050103 | V | D | I | K | V | L | L | V | M | W | F | -907.666 |
| '0101030302010101050104 | V | D | M | K | F | V | L | V | M | W | I | -907.665 |

|                         |   |   |   |   |   |   |   |   |   |   |   |          |
|-------------------------|---|---|---|---|---|---|---|---|---|---|---|----------|
| '0101010202030105010103 | V | D | I | H | F | L | L | M | V | W | F | -907.663 |
| '0101030102040101060101 | V | D | M | R | F | M | L | V | S | W | H | -907.658 |
| '0101010402020101020109 | V | D | I | Q | F | I | L | V | A | W | Q | -907.654 |
| '0301010103040101070110 | L | D | I | R | I | M | L | V | T | W | R | -907.653 |
| '0101010103040103030106 | V | D | I | R | I | M | L | I | I | W | L | -907.65  |
| '0101010102010201070105 | V | D | I | R | F | V | A | V | T | W | K | -907.649 |
| '0301010104010101040106 | L | D | I | R | M | V | L | V | L | W | L | -907.648 |
| '0101010103010103070112 | V | D | I | R | I | V | L | I | T | W | V | -907.648 |
| '0101020102010201040110 | V | D | L | R | F | V | A | V | L | W | R | -907.648 |
| '0101040103030105010112 | V | D | V | R | I | L | L | M | V | W | V | -907.647 |
| '0101040103020104030101 | V | D | V | R | I | I | L | L | I | W | H | -907.645 |
| '0101010304040101020109 | V | D | I | K | M | M | L | V | A | W | Q | -907.644 |
| '0101010202010103060111 | V | D | I | H | F | V | L | I | S | W | T | -907.644 |
| '0101040102010102060110 | V | D | V | R | F | V | L | A | S | W | R | -907.644 |
| '0201010103030401010106 | I | D | I | R | I | L | W | V | V | W | L | -907.643 |
| '0301040105010105020101 | L | D | V | R | V | V | L | M | A | W | H | -907.642 |
| '0101040105040201010106 | V | D | V | R | V | M | A | V | V | W | L | -907.642 |
| '0201020105020101050101 | I | D | L | R | V | I | L | V | M | W | H | -907.639 |
| '0101010304010101040108 | V | D | I | K | M | V | L | V | L | W | N | -907.636 |
| '0301010304010104010104 | L | D | I | K | M | V | L | L | V | W | I | -907.636 |
| '0301030102010102010110 | L | D | M | R | F | V | L | A | V | W | R | -907.635 |
| '0101040101010104070101 | V | D | V | R | L | V | L | L | T | W | H | -907.635 |
| '0101010101030103010106 | V | D | I | R | L | L | L | I | V | W | L | -907.634 |
| '0101010105020101070112 | V | D | I | R | V | I | L | V | T | W | V | -907.634 |
| '0101020105030103010102 | V | D | L | R | V | L | L | I | V | W | E | -907.631 |
| '0201010201020101040110 | I | D | I | H | L | I | L | V | L | W | R | -907.629 |
| '0101010203030103010105 | V | D | I | H | I | L | L | I | V | W | K | -907.627 |
| '0101010202010105030112 | V | D | I | H | F | V | L | M | I | W | V | -907.625 |
| '0101040401030101010101 | V | D | V | Q | L | L | L | V | V | W | H | -907.625 |
| '0101010305010103020107 | V | D | I | K | V | V | L | I | A | W | M | -907.624 |
| '0101010103030201020112 | V | D | I | R | I | L | A | V | A | W | V | -907.623 |
| '0101030105010105020104 | V | D | M | R | V | V | L | M | A | W | I | -907.62  |
| '0101010402020401010102 | V | D | I | Q | F | I | W | V | V | W | E | -907.618 |
| '0101010303020103070101 | V | D | I | K | I | I | L | I | T | W | H | -907.616 |
| '0101010104040101020101 | V | D | I | R | M | M | L | V | A | W | H | -907.616 |
| '0301010103010105040104 | L | D | I | R | I | V | L | M | L | W | I | -907.613 |
| '0301040102040101010106 | L | D | V | R | F | M | L | V | V | W | L | -907.613 |

|                         |   |   |   |   |   |   |   |   |   |   |   |          |
|-------------------------|---|---|---|---|---|---|---|---|---|---|---|----------|
| '0201010102010101060105 | I | D | I | R | F | V | L | V | S | W | K | -907.611 |
| '0101020102030201010102 | V | D | L | R | F | L | A | V | V | W | E | -907.61  |
| '0101010102020401050101 | V | D | I | R | F | I | W | V | M | W | H | -907.609 |
| '0101030102040101030111 | V | D | M | R | F | M | L | V | I | W | T | -907.608 |
| '0201010103010301040104 | I | D | I | R | I | V | V | V | L | W | I | -907.608 |
| '0201010404010103010101 | I | D | I | Q | M | V | L | I | V | W | H | -907.608 |
| '0301040102010103010105 | L | D | V | R | F | V | L | I | V | W | K | -907.607 |
| '0301010304010102010106 | L | D | I | K | M | V | L | A | V | W | L | -907.605 |
| '0101010303010103010101 | V | D | I | K | I | V | L | I | V | W | H | -907.604 |
| '0201040402010101010105 | I | D | V | Q | F | V | L | V | V | W | K | -907.604 |
| '0101040105040101020110 | V | D | V | R | V | M | L | V | A | W | R | -907.603 |
| '0101040102030104050101 | V | D | V | R | F | L | L | L | M | W | H | -907.601 |
| '0201010102010101010106 | I | D | I | R | F | V | L | V | V | W | L | -907.599 |
| '0201010103010103040109 | I | D | I | R | I | V | L | I | L | W | Q | -907.599 |
| '0101010204040301010101 | V | D | I | H | M | M | V | V | V | W | H | -907.597 |
| '0101020103020101050111 | V | D | L | R | I | I | L | V | M | W | T | -907.596 |
| '0101040404010101030110 | V | D | V | Q | M | V | L | V | I | W | R | -907.596 |
| '0101010103020401070106 | V | D | I | R | I | I | W | V | T | W | L | -907.595 |
| '0101010103040201010101 | V | D | I | R | I | M | A | V | V | W | H | -907.594 |
| '0101010202010301020106 | V | D | I | H | F | V | V | V | A | W | L | -907.593 |
| '0101020102020102010110 | V | D | L | R | F | I | L | A | V | W | R | -907.59  |
| '0101040103010304070101 | V | D | V | R | I | V | V | L | T | W | H | -907.587 |
| '0101010205020301070101 | V | D | I | H | V | I | V | V | T | W | H | -907.586 |
| '0301040201020101040101 | L | D | V | H | L | I | L | V | L | W | H | -907.584 |
| '0101010204040101020102 | V | D | I | H | M | M | L | V | A | W | E | -907.579 |
| '0101010104030103010101 | V | D | I | R | M | L | L | I | V | W | H | -907.578 |
| '0101010103030104030105 | V | D | I | R | I | L | L | L | I | W | K | -907.578 |
| '0101020102030102010108 | V | D | L | R | F | L | L | A | V | W | N | -907.577 |
| '0101020302010101010110 | V | D | L | K | F | V | L | V | V | W | R | -907.577 |
| '0101010102040103050101 | V | D | I | R | F | M | L | I | M | W | H | -907.574 |
| '0101040101010103030109 | V | D | V | R | L | V | L | I | I | W | Q | -907.573 |
| '0101030105010301070108 | V | D | M | R | V | V | V | V | T | W | N | -907.573 |
| '0101010405030103010101 | V | D | I | Q | V | L | L | I | V | W | H | -907.572 |
| '0101010203010304010106 | V | D | I | H | I | V | V | L | V | W | L | -907.571 |
| '0101010305010104070112 | V | D | I | K | V | V | L | L | T | W | V | -907.57  |
| '0101010205010201030106 | V | D | I | H | V | V | A | V | I | W | L | -907.57  |
| '0201010105010105030102 | I | D | I | R | V | V | L | M | I | W | E | -907.568 |

|                         |   |   |   |   |   |   |   |   |   |   |   |          |
|-------------------------|---|---|---|---|---|---|---|---|---|---|---|----------|
| '0101040103010203050101 | V | D | V | R | I | V | A | I | M | W | H | -907.566 |
| '0101040103040103010101 | V | D | V | R | I | M | L | I | V | W | H | -907.566 |
| '0301010102010105070104 | L | D | I | R | F | V | L | M | T | W | I | -907.561 |
| '0101040105010102040110 | V | D | V | R | V | V | L | A | L | W | R | -907.56  |
| '0201010203010104010106 | I | D | I | H | I | V | L | L | V | W | L | -907.559 |
| '0201030103010101010110 | I | D | M | R | I | V | L | V | V | W | R | -907.558 |
| '0101010404010104040112 | V | D | I | Q | M | V | L | L | L | W | V | -907.557 |
| '0201040203010104010101 | I | D | V | H | I | V | L | L | V | W | H | -907.556 |
| '0101020102010101030106 | V | D | L | R | F | V | L | V | I | W | L | -907.551 |
| '0301040105010201010101 | L | D | V | R | V | V | A | V | V | W | H | -907.55  |
| '0301010102020401010104 | L | D | I | R | F | I | W | V | V | W | I | -907.549 |
| '0101040105010401040105 | V | D | V | R | V | V | W | V | L | W | K | -907.546 |
| '0101020102040101040107 | V | D | L | R | F | M | L | V | L | W | M | -907.546 |
| '0301010102010104050101 | L | D | I | R | F | V | L | L | M | W | H | -907.543 |
| '0201010205010101070109 | I | D | I | H | V | V | L | V | T | W | Q | -907.54  |
| '0101030404010101040110 | V | D | M | Q | M | V | L | V | L | W | R | -907.539 |
| '0101030201010103050101 | V | D | M | H | L | V | L | I | M | W | H | -907.539 |
| '0101010402010105010101 | V | D | I | Q | F | V | L | M | V | W | H | -907.534 |
| '0101030105020401010112 | V | D | M | R | V | I | W | V | V | W | V | -907.534 |
| '0301040102010201010104 | L | D | V | R | F | V | A | V | V | W | I | -907.531 |
| '0101040103010105010106 | V | D | V | R | I | V | L | M | V | W | L | -907.531 |
| '0201010105040101070111 | I | D | I | R | V | M | L | V | T | W | T | -907.53  |
| '0301010101020101010105 | L | D | I | R | L | I | L | V | V | W | K | -907.529 |
| '0101010101010403040106 | V | D | I | R | L | V | W | I | L | W | L | -907.529 |
| '0101030101030301070104 | V | D | M | R | L | L | V | V | T | W | I | -907.528 |
| '0101030404030101040101 | V | D | M | Q | M | L | L | V | L | W | H | -907.527 |
| '0101010102010404040105 | V | D | I | R | F | V | W | L | L | W | K | -907.527 |
| '0301010205010101030112 | L | D | I | H | V | V | L | V | I | W | V | -907.521 |
| '0201020103010101040106 | I | D | L | R | I | V | L | V | L | W | L | -907.519 |
| '0101010405010104040105 | V | D | I | Q | V | V | L | L | L | W | K | -907.518 |
| '0201040101020101040106 | I | D | V | R | L | I | L | V | L | W | L | -907.513 |
| '0301010103010104040109 | L | D | I | R | I | V | L | L | L | W | Q | -907.513 |
| '0101010104020401010104 | V | D | I | R | M | I | W | V | V | W | I | -907.513 |
| '0101010205010301040101 | V | D | I | H | V | V | V | V | L | W | H | -907.513 |
| '0101010302020102070101 | V | D | I | K | F | I | L | A | T | W | H | -907.512 |
| '0301030103010104070101 | L | D | M | R | I | V | L | L | T | W | H | -907.512 |
| '0201010103030201010110 | I | D | I | R | I | L | A | V | V | W | R | -907.511 |

|                         |   |   |   |   |   |   |   |   |   |   |   |          |
|-------------------------|---|---|---|---|---|---|---|---|---|---|---|----------|
| '0201010104010101040108 | I | D | I | R | M | V | L | V | L | W | N | -907.51  |
| '0101030102010203030101 | V | D | M | R | F | V | A | I | I | W | H | -907.509 |
| '0201030105010101020112 | I | D | M | R | V | V | L | V | A | W | V | -907.509 |
| '0101010201030401010105 | V | D | I | H | L | L | W | V | V | W | K | -907.507 |
| '0101030104010105040104 | V | D | M | R | M | V | L | M | L | W | I | -907.506 |
| '0101010303020101070102 | V | D | I | K | I | I | L | V | T | W | E | -907.505 |
| '0201010204020101010108 | I | D | I | H | M | I | L | V | V | W | N | -907.504 |
| '0101010104030103030107 | V | D | I | R | M | L | L | I | I | W | M | -907.504 |
| '0101010403010105040106 | V | D | I | Q | I | V | L | M | L | W | L | -907.503 |
| '0101040201010103040112 | V | D | V | H | L | V | L | I | L | W | V | -907.502 |
| '0101030102010102050110 | V | D | M | R | F | V | L | A | M | W | R | -907.497 |
| '0101030203040201010101 | V | D | M | H | I | M | A | V | V | W | H | -907.496 |
| '0301010201010104020105 | L | D | I | H | L | V | L | L | A | W | K | -907.495 |
| '0101020102010304010101 | V | D | L | R | F | V | V | L | V | W | H | -907.494 |
| '0201010104020101030105 | I | D | I | R | M | I | L | V | I | W | K | -907.49  |
| '0301010102010101030109 | L | D | I | R | F | V | L | V | I | W | Q | -907.487 |
| '0101030105010301010101 | V | D | M | R | V | V | V | V | V | W | H | -907.486 |
| '0101030102010403070101 | V | D | M | R | F | V | W | I | T | W | H | -907.482 |
| '0101020102010303010109 | V | D | L | R | F | V | V | I | V | W | Q | -907.481 |
| '0101010105010105030104 | V | D | I | R | V | V | L | M | I | W | I | -907.481 |
| '0101010405030301010104 | V | D | I | Q | V | L | V | V | V | W | I | -907.477 |
| '0101030201020104010110 | V | D | M | H | L | I | L | L | V | W | R | -907.477 |
| '0101040105010101020106 | V | D | V | R | V | V | L | V | A | W | L | -907.476 |
| '0201010201040101070106 | I | D | I | H | L | M | L | V | T | W | L | -907.475 |
| '0301010103010104020105 | L | D | I | R | I | V | L | L | A | W | K | -907.474 |
| '0101040101030201050101 | V | D | V | R | L | L | A | V | M | W | H | -907.473 |
| '0301040205010101020101 | L | D | V | H | V | V | L | V | A | W | H | -907.471 |
| '0301030105010104040101 | L | D | M | R | V | V | L | L | L | W | H | -907.467 |
| '0101010105030301050102 | V | D | I | R | V | L | V | V | M | W | E | -907.465 |
| '0101030402010403010101 | V | D | M | Q | F | V | W | I | V | W | H | -907.462 |
| '0101010405010105040108 | V | D | I | Q | V | V | L | M | L | W | N | -907.462 |
| '0101040105040101050111 | V | D | V | R | V | M | L | V | M | W | T | -907.458 |
| '0101040103020404010101 | V | D | V | R | I | I | W | L | V | W | H | -907.458 |
| '0101010402010103050103 | V | D | I | Q | F | V | L | I | M | W | F | -907.456 |
| '0101040104040101040108 | V | D | V | R | M | M | L | V | L | W | N | -907.456 |
| '0101020103010103050108 | V | D | L | R | I | V | L | I | M | W | N | -907.456 |
| '0101030102040301010111 | V | D | M | R | F | M | V | V | V | W | T | -907.454 |

|                         |   |   |   |   |   |   |   |   |   |   |   |          |
|-------------------------|---|---|---|---|---|---|---|---|---|---|---|----------|
| '0101010105010304020104 | V | D | I | R | V | V | V | L | A | W | I | -907.454 |
| '0201030105010105020101 | I | D | M | R | V | V | L | M | A | W | H | -907.454 |
| '0101040105010105070108 | V | D | V | R | V | V | L | M | T | W | N | -907.453 |
| '0101020102010104050110 | V | D | L | R | F | V | L | L | M | W | R | -907.448 |
| '0101010302020104010105 | V | D | I | K | F | I | L | L | V | W | K | -907.448 |
| '0201010203030301010101 | I | D | I | H | I | L | V | V | V | W | H | -907.447 |
| '0201010402010105070101 | I | D | I | Q | F | V | L | M | T | W | H | -907.447 |
| '0201030102010101030109 | I | D | M | R | F | V | L | V | I | W | Q | -907.446 |
| '0101010105010301020108 | V | D | I | R | V | V | V | V | A | W | N | -907.445 |
| '0201010102010402010106 | I | D | I | R | F | V | W | A | V | W | L | -907.445 |
| '0101010103020303070101 | V | D | I | R | I | I | V | I | T | W | H | -907.445 |
| '0201010405010105010112 | I | D | I | Q | V | V | L | M | V | W | V | -907.442 |
| '0301010105020101050105 | L | D | I | R | V | I | L | V | M | W | K | -907.441 |
| '0101030303030101010103 | V | D | M | K | I | L | L | V | V | W | F | -907.439 |
| '0301010202010102070101 | L | D | I | H | F | V | L | A | T | W | H | -907.437 |
| '0301010103010102030108 | L | D | I | R | I | V | L | A | I | W | N | -907.437 |
| '0101010204030101010108 | V | D | I | H | M | L | L | V | V | W | N | -907.432 |
| '0101040104020201010101 | V | D | V | R | M | I | A | V | V | W | H | -907.431 |
| '0301010203010104070101 | L | D | I | H | I | V | L | L | T | W | H | -907.43  |
| '0101020102040101050110 | V | D | L | R | F | M | L | V | M | W | R | -907.427 |
| '0101020402010104010101 | V | D | L | Q | F | V | L | L | V | W | H | -907.425 |
| '0101010405020103010106 | V | D | I | Q | V | I | L | I | V | W | L | -907.423 |
| '0101030404020101010105 | V | D | M | Q | M | I | L | V | V | W | K | -907.42  |
| '0301040102010102060101 | L | D | V | R | F | V | L | A | S | W | H | -907.42  |
| '0101010204030301020101 | V | D | I | H | M | L | V | V | A | W | H | -907.419 |
| '0101010303020103010109 | V | D | I | K | I | I | L | I | V | W | Q | -907.418 |
| '0201030103010105040101 | I | D | M | R | I | V | L | M | L | W | H | -907.418 |
| '0101010102020401030108 | V | D | I | R | F | I | W | V | I | W | N | -907.417 |
| '0101010402010103060112 | V | D | I | Q | F | V | L | I | S | W | V | -907.416 |
| '0101010102030301020101 | V | D | I | R | F | L | V | V | A | W | H | -907.416 |
| '0101010205040101060108 | V | D | I | H | V | M | L | V | S | W | N | -907.415 |
| '0301040101020101020105 | L | D | V | R | L | I | L | V | A | W | K | -907.414 |
| '0201040103010105050101 | I | D | V | R | I | V | L | M | M | W | H | -907.414 |
| '0101030105020301050101 | V | D | M | R | V | I | V | V | M | W | H | -907.413 |
| '0201020201020101010101 | I | D | L | H | L | I | L | V | V | W | H | -907.413 |
| '0101010204030401010112 | V | D | I | H | M | L | W | V | V | W | V | -907.412 |
| '0101010305030103010112 | V | D | I | K | V | L | L | I | V | W | V | -907.412 |

|                         |   |   |   |   |   |   |   |   |   |   |   |          |
|-------------------------|---|---|---|---|---|---|---|---|---|---|---|----------|
| '0101010103010303070105 | V | D | I | R | I | V | V | I | T | W | K | -907.409 |
| '0101010105010401040104 | V | D | I | R | V | V | W | V | L | W | I | -907.408 |
| '0201030201030101010110 | I | D | M | H | L | L | L | V | V | W | R | -907.407 |
| '0101040104010105020111 | V | D | V | R | M | V | L | M | A | W | T | -907.405 |
| '0201010302020102010101 | I | D | I | K | F | I | L | A | V | W | H | -907.404 |
| '0101010204010104020102 | V | D | I | H | M | V | L | L | A | W | E | -907.402 |
| '0101010304010301070104 | V | D | I | K | M | V | V | V | T | W | I | -907.402 |
| '0101010102040301070107 | V | D | I | R | F | M | V | V | T | W | M | -907.399 |
| '0201030103010101050101 | I | D | M | R | I | V | L | V | M | W | H | -907.399 |
| '0101010405020101010110 | V | D | I | Q | V | I | L | V | V | W | R | -907.399 |
| '0101010102010301070101 | V | D | I | R | F | V | V | V | T | W | H | -907.398 |
| '0101010205010101020104 | V | D | I | H | V | V | L | V | A | W | I | -907.398 |
| '0101010205010103020102 | V | D | I | H | V | V | L | I | A | W | E | -907.397 |
| '0101030305040101010111 | V | D | M | K | V | M | L | V | V | W | T | -907.397 |
| '0301010103010104070110 | L | D | I | R | I | V | L | L | T | W | R | -907.395 |
| '0201010101020402010105 | I | D | I | R | L | I | W | A | V | W | K | -907.395 |
| '0101040102010301070107 | V | D | V | R | F | V | V | V | T | W | M | -907.393 |
| '0101010203030201010108 | V | D | I | H | I | L | A | V | V | W | N | -907.393 |
| '0101040105010203010103 | V | D | V | R | V | V | A | I | V | W | F | -907.392 |
| '0301030201020102010101 | L | D | M | H | L | I | L | A | V | W | H | -907.389 |
| '0301010102040102010109 | L | D | I | R | F | M | L | A | V | W | Q | -907.387 |
| '0101010102040103030109 | V | D | I | R | F | M | L | I | I | W | Q | -907.386 |
| '0101040101020105040106 | V | D | V | R | L | I | L | M | L | W | L | -907.385 |
| '0101010101020103010108 | V | D | I | R | L | I | L | I | V | W | N | -907.384 |
| '0301010105020301010101 | L | D | I | R | V | I | V | V | V | W | H | -907.384 |
| '0101010102010304070105 | V | D | I | R | F | V | V | L | T | W | K | -907.378 |
| '0101040102010401010104 | V | D | V | R | F | V | W | V | V | W | I | -907.378 |
| '0301010203030104010101 | L | D | I | H | I | L | L | L | V | W | H | -907.378 |
| '0101020101010104010106 | V | D | L | R | L | V | L | L | V | W | L | -907.376 |
| '0101010203010105040101 | V | D | I | H | I | V | L | M | L | W | H | -907.376 |
| '0101030102010105050106 | V | D | M | R | F | V | L | M | M | W | L | -907.375 |
| '0101040103010105040107 | V | D | V | R | I | V | L | M | L | W | M | -907.375 |
| '0201010203010101040104 | I | D | I | H | I | V | L | V | L | W | I | -907.373 |
| '0101030101040101050106 | V | D | M | R | L | M | L | V | M | W | L | -907.37  |
| '0301010105040101010110 | L | D | I | R | V | M | L | V | V | W | R | -907.367 |
| '0101010105020103020110 | V | D | I | R | V | I | L | I | A | W | R | -907.367 |
| '0101010104030101020112 | V | D | I | R | M | L | L | V | A | W | V | -907.367 |

|                         |   |   |   |   |   |   |   |   |   |   |   |          |
|-------------------------|---|---|---|---|---|---|---|---|---|---|---|----------|
| '0101010103020102070106 | V | D | I | R | I | I | L | A | T | W | L | -907.367 |
| '02010401020101010103   | I | D | V | R | F | V | L | V | V | W | F | -907.366 |
| '0201030102010101060110 | I | D | M | R | F | V | L | V | S | W | R | -907.364 |
| '0101010103020104030104 | V | D | I | R | I | I | L | L | I | W | I | -907.363 |
| '0101020102010105040104 | V | D | L | R | F | V | L | M | L | W | I | -907.362 |
| '0301010102020201010111 | L | D | I | R | F | I | A | V | V | W | T | -907.362 |
| '0301010103010204010104 | L | D | I | R | I | V | A | L | V | W | I | -907.362 |
| '0101040302010101060105 | V | D | V | K | F | V | L | V | S | W | K | -907.362 |
| '0301010102020101060101 | L | D | I | R | F | I | L | V | S | W | H | -907.36  |
| '0101010102030102040110 | V | D | I | R | F | L | L | A | L | W | R | -907.359 |
| '0101020102010101050103 | V | D | L | R | F | V | L | V | M | W | F | -907.359 |
| '0201010302030101010102 | I | D | I | K | F | L | L | V | V | W | E | -907.357 |
| '0101040101030401010105 | V | D | V | R | L | L | W | V | V | W | K | -907.357 |
| '0101020302030201010101 | V | D | L | K | F | L | A | V | V | W | H | -907.357 |
| '0101030203010101020105 | V | D | M | H | I | V | L | V | A | W | K | -907.357 |
| '0101040201020105010105 | V | D | V | H | L | I | L | M | V | W | K | -907.356 |
| '0101020102020201070101 | V | D | L | R | F | I | A | V | T | W | H | -907.353 |
| '0101010203020103020101 | V | D | I | H | I | I | L | I | A | W | H | -907.353 |
| '0201010405010104010106 | I | D | I | Q | V | V | L | L | V | W | L | -907.352 |
| '0101010102010403070112 | V | D | I | R | F | V | W | I | T | W | V | -907.352 |
| '0101040104020103060101 | V | D | V | R | M | I | L | I | S | W | H | -907.351 |
| '0101010402010101010106 | V | D | I | Q | F | V | L | V | V | W | L | -907.349 |
| '0301040303020101010101 | L | D | V | K | I | I | L | V | V | W | H | -907.347 |
| '0301010103030101010105 | L | D | I | R | I | L | L | V | V | W | K | -907.347 |
| '0101010201010103010110 | V | D | I | H | L | V | L | I | V | W | R | -907.345 |
| '0101010302030301050101 | V | D | I | K | F | L | V | V | M | W | H | -907.342 |
| '0101040105010204070101 | V | D | V | R | V | V | A | L | T | W | H | -907.342 |
| '0101010201020301010105 | V | D | I | H | L | I | V | V | V | W | K | -907.342 |
| '0201010203010101020111 | I | D | I | H | I | V | L | V | A | W | T | -907.341 |
| '0101040102030105010110 | V | D | V | R | F | L | L | M | V | W | R | -907.34  |
| '0101030105010103060111 | V | D | M | R | V | V | L | I | S | W | T | -907.339 |
| '0301040103010101040109 | L | D | V | R | I | V | L | V | L | W | Q | -907.338 |
| '0201040105010201010110 | I | D | V | R | V | V | A | V | V | W | R | -907.335 |
| '0301030105010103010106 | L | D | M | R | V | V | L | I | V | W | L | -907.334 |
| '0101010305040301010112 | V | D | I | K | V | M | V | V | V | W | V | -907.327 |
| '0201040104010103010110 | I | D | V | R | M | V | L | I | V | W | R | -907.326 |
| '0101010403030101060106 | V | D | I | Q | I | L | L | V | S | W | L | -907.323 |



|                         |   |   |   |   |   |   |   |   |   |   |   |          |
|-------------------------|---|---|---|---|---|---|---|---|---|---|---|----------|
| '0101040102040103030101 | V | D | V | R | F | M | L | I | I | W | H | -907.321 |
| '0101040401010103040108 | V | D | V | Q | L | V | L | I | L | W | N | -907.318 |
| '0101010304020105010101 | V | D | I | K | M | I | L | M | V | W | H | -907.315 |
| '0301030102010101040102 | L | D | M | R | F | V | L | V | L | W | E | -907.314 |
| '0101030203010401040101 | V | D | M | H | I | V | W | V | L | W | H | -907.313 |
| '0101020105010104030104 | V | D | L | R | V | V | L | L | I | W | I | -907.313 |
| '0101040103040101060104 | V | D | V | R | I | M | L | V | S | W | I | -907.313 |
| '0101040101030103070105 | V | D | V | R | L | L | L | I | T | W | K | -907.31  |
| '0101010404040101010109 | V | D | I | Q | M | M | L | V | V | W | Q | -907.307 |
| '0101010105010304010108 | V | D | I | R | V | V | V | L | V | W | N | -907.304 |
| '0201010302010105010102 | I | D | I | K | F | V | L | M | V | W | E | -907.302 |
| '0101030105040301020101 | V | D | M | R | V | M | V | V | A | W | H | -907.302 |
| '0101010305020105010105 | V | D | I | K | V | I | L | M | V | W | K | -907.301 |
| '0301040302010101070101 | L | D | V | K | F | V | L | V | T | W | H | -907.299 |
| '0101020302010104010102 | V | D | L | K | F | V | L | L | V | W | E | -907.299 |
| '0101020105020101060110 | V | D | L | R | V | I | L | V | S | W | R | -907.298 |
| '0101030301010103030105 | V | D | M | K | L | V | L | I | I | W | K | -907.295 |
| '0101020103010101050101 | V | D | L | R | I | V | L | V | M | W | H | -907.294 |
| '0101030105030301070101 | V | D | M | R | V | L | V | V | T | W | H | -907.293 |
| '0301020103020101010101 | L | D | L | R | I | I | L | V | V | W | H | -907.292 |
| '0201040401020103010101 | I | D | V | Q | L | I | L | I | V | W | H | -907.291 |
| '0101010403030301050101 | V | D | I | Q | I | L | V | V | M | W | H | -907.29  |
| '0101040105010101070111 | V | D | V | R | V | V | L | V | T | W | T | -907.289 |
| '0101030101030103050109 | V | D | M | R | L | L | L | I | M | W | Q | -907.289 |
| '0201010201030101040112 | I | D | I | H | L | L | L | V | L | W | V | -907.288 |
| '0101030104030103010102 | V | D | M | R | M | L | L | I | V | W | E | -907.288 |
| '0101040101020103030107 | V | D | V | R | L | I | L | I | I | W | M | -907.287 |
| '0301040202030101010101 | L | D | V | H | F | L | L | V | V | W | H | -907.282 |
| '0101040103040101050109 | V | D | V | R | I | M | L | V | M | W | Q | -907.282 |
| '0101010205020105010109 | V | D | I | H | V | I | L | M | V | W | Q | -907.282 |
| '0101010104010101020108 | V | D | I | R | M | V | L | V | A | W | N | -907.281 |
| '0101040102010404010102 | V | D | V | R | F | V | W | L | V | W | E | -907.279 |
| '0101040203010101060108 | V | D | V | H | I | V | L | V | S | W | N | -907.276 |
| '0101010102030401050106 | V | D | I | R | F | L | W | V | M | W | L | -907.275 |
| '0301040305010104010101 | L | D | V | K | V | V | L | L | V | W | H | -907.274 |
| '0101010305010304010104 | V | D | I | K | V | V | V | L | V | W | I | -907.274 |
| '0101010105020104050109 | V | D | I | R | V | I | L | L | M | W | Q | -907.273 |

|                         |   |   |   |   |   |   |   |   |   |   |   |          |
|-------------------------|---|---|---|---|---|---|---|---|---|---|---|----------|
| '0101010103020303010106 | V | D | I | R | I | I | V | I | V | W | L | -907.272 |
| '0101030103010203010107 | V | D | M | R | I | V | A | I | V | W | M | -907.272 |
| '0101010403010104070109 | V | D | I | Q | I | V | L | L | T | W | Q | -907.269 |
| '02010304030301010101   | I | D | M | Q | I | L | L | V | V | W | H | -907.268 |
| '0101010402010203010101 | V | D | I | Q | F | V | A | I | V | W | H | -907.268 |
| '0101010205010105070104 | V | D | I | H | V | V | L | M | T | W | I | -907.264 |
| '0101040401010104010106 | V | D | V | Q | L | V | L | L | V | W | L | -907.263 |
| '0101040403040101010112 | V | D | V | Q | I | M | L | V | V | W | V | -907.26  |
| '0101030105030101060110 | V | D | M | R | V | L | L | V | S | W | R | -907.26  |
| '0101010305010105040110 | V | D | I | K | V | V | L | M | L | W | R | -907.258 |
| '0101010204010204010106 | V | D | I | H | M | V | A | L | V | W | L | -907.256 |
| '0201010202020104010101 | I | D | I | H | F | I | L | L | V | W | H | -907.253 |
| '0101020204020101010105 | V | D | L | H | M | I | L | V | V | W | K | -907.251 |
| '0101010205010105040102 | V | D | I | H | V | V | L | M | L | W | E | -907.248 |
| '0201010102030301040101 | I | D | I | R | F | L | V | V | L | W | H | -907.247 |
| '0101010402040101030102 | V | D | I | Q | F | M | L | V | I | W | E | -907.247 |
| '0101010302010105010107 | V | D | I | K | F | V | L | M | V | W | M | -907.245 |
| '0301010201020201010104 | L | D | I | H | L | I | A | V | V | W | I | -907.245 |
| '0101010402010404010105 | V | D | I | Q | F | V | W | L | V | W | K | -907.244 |
| '0301010104040101040104 | L | D | I | R | M | M | L | V | L | W | I | -907.243 |
| '0101040102040102010109 | V | D | V | R | F | M | L | A | V | W | Q | -907.242 |
| '0101010405010102040104 | V | D | I | Q | V | V | L | A | L | W | I | -907.241 |
| '0101010103030103030103 | V | D | I | R | I | L | L | I | I | W | F | -907.24  |
| '0101010302030403010101 | V | D | I | K | F | L | W | I | V | W | H | -907.237 |
| '0101010103030401020101 | V | D | I | R | I | L | W | V | A | W | H | -907.236 |
| '0101020104010103070111 | V | D | L | R | M | V | L | I | T | W | T | -907.236 |
| '0101010301040101030104 | V | D | I | K | L | M | L | V | I | W | I | -907.236 |
| '0301010405040101010106 | L | D | I | Q | V | M | L | V | V | W | L | -907.235 |
| '0201030101030101010108 | I | D | M | R | L | L | L | V | V | W | N | -907.234 |
| '0101040202010101050111 | V | D | V | H | F | V | L | V | M | W | T | -907.234 |
| '0101030204010101030110 | V | D | M | H | M | V | L | V | I | W | R | -907.233 |
| '0201010104040101020104 | I | D | I | R | M | M | L | V | A | W | I | -907.23  |
| '0101030103020301010111 | V | D | M | R | I | I | V | V | V | W | T | -907.229 |
| '0101010104020105010104 | V | D | I | R | M | I | L | M | V | W | I | -907.229 |
| '0101030405010101030105 | V | D | M | Q | V | V | L | V | I | W | K | -907.227 |
| '0301010105010102040108 | L | D | I | R | V | V | L | A | L | W | N | -907.227 |
| '0201010105010301040108 | I | D | I | R | V | V | V | V | L | W | N | -907.222 |

|                         |   |   |   |   |   |   |   |   |   |   |   |          |
|-------------------------|---|---|---|---|---|---|---|---|---|---|---|----------|
| '0101010101030304040104 | V | D | I | R | L | L | V | L | L | W | I | -907.222 |
| '0101020101030103020110 | V | D | L | R | L | L | L | I | A | W | R | -907.221 |
| '0101030105040103050101 | V | D | M | R | V | M | L | I | M | W | H | -907.22  |
| '0101030104010101070101 | V | D | M | R | M | V | L | V | T | W | H | -907.22  |
| '0101040101020101070106 | V | D | V | R | L | I | L | V | T | W | L | -907.219 |
| '0101030301020101030108 | V | D | M | K | L | I | L | V | I | W | N | -907.217 |
| '0201010205020105010101 | I | D | I | H | V | I | L | M | V | W | H | -907.217 |
| '0101030105010301020104 | V | D | M | R | V | V | V | V | A | W | I | -907.216 |
| '0201030103020102010101 | I | D | M | R | I | I | L | A | V | W | H | -907.215 |
| '0101010204030101030109 | V | D | I | H | M | L | L | V | I | W | Q | -907.215 |
| '0301010305010104010110 | L | D | I | K | V | V | L | L | V | W | R | -907.212 |
| '0101010104020103050110 | V | D | I | R | M | I | L | I | M | W | R | -907.211 |
| '0201040101030102040101 | I | D | V | R | L | L | L | A | L | W | H | -907.211 |
| '0101040105010203030101 | V | D | V | R | V | V | A | I | I | W | H | -907.206 |
| '0101010204010103070109 | V | D | I | H | M | V | L | I | T | W | Q | -907.206 |
| '0201020102010101040102 | I | D | L | R | F | V | L | V | L | W | E | -907.206 |
| '0101040305020101010108 | V | D | V | K | V | I | L | V | V | W | N | -907.205 |
| '0101030104020101070102 | V | D | M | R | M | I | L | V | T | W | E | -907.202 |
| '0201030105010102040101 | I | D | M | R | V | V | L | A | L | W | H | -907.202 |
| '0101040402030201010101 | V | D | V | Q | F | L | A | V | V | W | H | -907.201 |
| '0101030101030301040106 | V | D | M | R | L | L | V | V | L | W | L | -907.2   |
| '0101040104010103020105 | V | D | V | R | M | V | L | I | A | W | K | -907.2   |
| '0101040102010203020101 | V | D | V | R | F | V | A | I | A | W | H | -907.2   |
| '0201010103040101030108 | I | D | I | R | I | M | L | V | I | W | N | -907.2   |
| '0101010402010102040109 | V | D | I | Q | F | V | L | A | L | W | Q | -907.198 |
| '0101010103010101020104 | V | D | I | R | I | V | L | V | A | W | I | -907.197 |
| '0301030105010101070101 | L | D | M | R | V | V | L | V | T | W | H | -907.195 |
| '0101010101030103070101 | V | D | I | R | L | L | L | I | T | W | H | -907.194 |
| '0101040305010103010105 | V | D | V | K | V | V | L | I | V | W | K | -907.193 |
| '0101010205030101070112 | V | D | I | H | V | L | L | V | T | W | V | -907.193 |
| '0101010203030101060102 | V | D | I | H | I | L | L | V | S | W | E | -907.191 |
| '0101030102010404010106 | V | D | M | R | F | V | W | L | V | W | L | -907.189 |
| '0101030201040101050101 | V | D | M | H | L | M | L | V | M | W | H | -907.188 |
| '0301040102010104040101 | L | D | V | R | F | V | L | L | L | W | H | -907.187 |
| '0101010104030201070105 | V | D | I | R | M | L | A | V | T | W | K | -907.186 |
| '0201010103010105030105 | I | D | I | R | I | V | L | M | I | W | K | -907.184 |
| '0101010204010104070101 | V | D | I | H | M | V | L | L | T | W | H | -907.183 |

|                         |   |   |   |   |   |   |   |   |   |   |   |          |
|-------------------------|---|---|---|---|---|---|---|---|---|---|---|----------|
| '0201040405010101010107 | I | D | V | Q | V | V | L | V | V | W | M | -907.182 |
| '0201010403020101020101 | I | D | I | Q | I | I | L | V | A | W | H | -907.182 |
| '0101010105020404010109 | V | D | I | R | V | I | W | L | V | W | Q | -907.181 |
| '0201010201010103030112 | I | D | I | H | L | V | L | I | I | W | V | -907.181 |
| '0101040403010101010101 | V | D | V | Q | I | V | L | V | V | W | H | -907.179 |
| '0101010401010104010105 | V | D | I | Q | L | V | L | L | V | W | K | -907.179 |
| '0101010103020105010105 | V | D | I | R | I | I | L | M | V | W | K | -907.178 |
| '0101010105040101070110 | V | D | I | R | V | M | L | V | T | W | R | -907.177 |
| '0101030103040101050103 | V | D | M | R | I | M | L | V | M | W | F | -907.173 |
| '0101040101030101070108 | V | D | V | R | L | L | L | V | T | W | N | -907.173 |
| '0101010305040103010108 | V | D | I | K | V | M | L | I | V | W | N | -907.171 |
| '0101020302010103020101 | V | D | L | K | F | V | L | I | A | W | H | -907.169 |
| '0101010103030401010109 | V | D | I | R | I | L | W | V | V | W | Q | -907.166 |
| '0101020405010104010108 | V | D | L | Q | V | V | L | L | V | W | N | -907.166 |
| '0101010104040101030112 | V | D | I | R | M | M | L | V | I | W | V | -907.166 |
| '0101030201030103010110 | V | D | M | H | L | L | L | I | V | W | R | -907.165 |
| '0101010102010105050108 | V | D | I | R | F | V | L | M | M | W | N | -907.164 |
| '0101030105040301010106 | V | D | M | R | V | M | V | V | V | W | L | -907.163 |
| '0101020201030101020108 | V | D | L | H | L | L | L | V | A | W | N | -907.162 |
| '0201010105010205010104 | I | D | I | R | V | V | A | M | V | W | I | -907.162 |
| '0101040102040101030105 | V | D | V | R | F | M | L | V | I | W | K | -907.161 |
| '0101040104020105040101 | V | D | V | R | M | I | L | M | L | W | H | -907.161 |
| '0201010203030101010105 | I | D | I | H | I | L | L | V | V | W | K | -907.161 |
| '0101030102020202010101 | V | D | M | R | F | I | A | A | V | W | H | -907.161 |
| '0101010402030401010108 | V | D | I | Q | F | L | W | V | V | W | N | -907.159 |
| '0101030305010104020101 | V | D | M | K | V | V | L | L | A | W | H | -907.159 |
| '0101010302020401010112 | V | D | I | K | F | I | W | V | V | W | V | -907.159 |
| '0101010205030103010107 | V | D | I | H | V | L | L | I | V | W | M | -907.156 |
| '0101030105010105030110 | V | D | M | R | V | V | L | M | I | W | R | -907.154 |
| '0101010403010403010110 | V | D | I | Q | I | V | W | I | V | W | R | -907.152 |
| '0101020105030101060106 | V | D | L | R | V | L | L | V | S | W | L | -907.151 |
| '0101010104020101020105 | V | D | I | R | M | I | L | V | A | W | K | -907.151 |
| '0101030202010104070101 | V | D | M | H | F | V | L | L | T | W | H | -907.15  |
| '0301030101020101040108 | L | D | M | R | L | I | L | V | L | W | N | -907.15  |
| '0201010102020103050101 | I | D | I | R | F | I | L | I | M | W | H | -907.15  |
| '0101030105040103010112 | V | D | M | R | V | M | L | I | V | W | V | -907.149 |
| '0101010102010303030108 | V | D | I | R | F | V | V | I | I | W | N | -907.149 |

|                         |   |   |   |   |   |   |   |   |   |   |   |          |
|-------------------------|---|---|---|---|---|---|---|---|---|---|---|----------|
| '0201020102010101010109 | I | D | L | R | F | V | L | V | V | W | Q | -907.149 |
| '0201040104010104010106 | I | D | V | R | M | V | L | L | V | W | L | -907.147 |
| '0201020103030101010105 | I | D | L | R | I | L | L | V | V | W | K | -907.147 |
| '0201040103010104040101 | I | D | V | R | I | V | L | L | L | W | H | -907.145 |
| '0101010102010201060106 | V | D | I | R | F | V | A | V | S | W | L | -907.142 |
| '0101010102040301060112 | V | D | I | R | F | M | V | V | S | W | V | -907.141 |
| '0201010203010105070101 | I | D | I | H | I | V | L | M | T | W | H | -907.141 |
| '0101010103030301060110 | V | D | I | R | I | L | V | V | S | W | R | -907.138 |
| '0101020402010101040109 | V | D | L | Q | F | V | L | V | L | W | Q | -907.136 |
| '0201010201040101040105 | I | D | I | H | L | M | L | V | L | W | K | -907.136 |
| '0301010205010101060110 | L | D | I | H | V | V | L | V | S | W | R | -907.135 |
| '0201040105010101050111 | I | D | V | R | V | V | L | V | M | W | T | -907.134 |
| '0101010102010301050104 | V | D | I | R | F | V | V | V | M | W | I | -907.134 |
| '0201010105010403010104 | I | D | I | R | V | V | W | I | V | W | I | -907.134 |
| '0101010104030401020106 | V | D | I | R | M | L | W | V | A | W | L | -907.131 |
| '0101040104010101050101 | V | D | V | R | M | V | L | V | M | W | H | -907.128 |
| '0101040103010104060107 | V | D | V | R | I | V | L | L | S | W | M | -907.127 |
| '0101010204040101060112 | V | D | I | H | M | M | L | V | S | W | V | -907.125 |
| '0301010105010104030109 | L | D | I | R | V | V | L | L | I | W | Q | -907.125 |
| '0101030201040101030110 | V | D | M | H | L | M | L | V | I | W | R | -907.123 |
| '0101020102010201010101 | V | D | L | R | F | V | A | V | V | W | H | -907.122 |
| '0101030204030101020101 | V | D | M | H | M | L | L | V | A | W | H | -907.122 |
| '0301010105040101030112 | L | D | I | R | V | M | L | V | I | W | V | -907.12  |
| '0101010205040102010108 | V | D | I | H | V | M | L | A | V | W | N | -907.12  |
| '0301040104010101010106 | L | D | V | R | M | V | L | V | V | W | L | -907.119 |
| '0101010203030301070101 | V | D | I | H | I | L | V | V | T | W | H | -907.119 |
| '0301010402010104070101 | L | D | I | Q | F | V | L | L | T | W | H | -907.116 |
| '0101010304030104040101 | V | D | I | K | M | L | L | L | L | W | H | -907.115 |
| '0101010102040103020110 | V | D | I | R | F | M | L | I | A | W | R | -907.113 |
| '0201010205010105040101 | I | D | I | H | V | V | L | M | L | W | H | -907.113 |
| '0101020201020201010105 | V | D | L | H | L | I | A | V | V | W | K | -907.113 |
| '0201010105040102010112 | I | D | I | R | V | M | L | A | V | W | V | -907.112 |
| '0101020202010101060112 | V | D | L | H | F | V | L | V | S | W | V | -907.111 |
| '0101020103020401010106 | V | D | L | R | I | I | W | V | V | W | L | -907.11  |
| '0301010102040102070101 | L | D | I | R | F | M | L | A | T | W | H | -907.107 |
| '0101030305010201010112 | V | D | M | K | V | V | A | V | V | W | V | -907.107 |
| '0101040305040101010101 | V | D | V | K | V | M | L | V | V | W | H | -907.105 |

|                         |   |   |   |   |   |   |   |   |   |   |   |          |
|-------------------------|---|---|---|---|---|---|---|---|---|---|---|----------|
| '0101010205010404010104 | V | D | I | H | V | V | W | L | V | W | I | -907.103 |
| '0101010405020104050101 | V | D | I | Q | V | I | L | L | M | W | H | -907.101 |
| '0101020102010105010106 | V | D | L | R | F | V | L | M | V | W | L | -907.1   |
| '0101030103040101020110 | V | D | M | R | I | M | L | V | A | W | R | -907.1   |
| '0101040103030401040101 | V | D | V | R | I | L | W | V | L | W | H | -907.099 |
| '0101020202010104050101 | V | D | L | H | F | V | L | L | M | W | H | -907.097 |
| '0101010105020105070104 | V | D | I | R | V | I | L | M | T | W | I | -907.097 |
| '0101040403030301010101 | V | D | V | Q | I | L | V | V | V | W | H | -907.097 |
| '0101030104030104010109 | V | D | M | R | M | L | L | L | V | W | Q | -907.096 |
| '0101010302010201070109 | V | D | I | K | F | V | A | V | T | W | Q | -907.095 |
| '0101030201010101050105 | V | D | M | H | L | V | L | V | M | W | K | -907.094 |
| '0101010105010304040101 | V | D | I | R | V | V | V | L | L | W | H | -907.093 |
| '0101010105010404020106 | V | D | I | R | V | V | W | L | A | W | L | -907.093 |
| '0101030105010301050110 | V | D | M | R | V | V | V | V | M | W | R | -907.093 |
| '0101010201030301050110 | V | D | I | H | L | L | V | V | M | W | R | -907.091 |
| '0101010202020101060102 | V | D | I | H | F | I | L | V | S | W | E | -907.089 |
| '0201010102020301060101 | I | D | I | R | F | I | V | V | S | W | H | -907.087 |
| '0301020102010102010105 | L | D | L | R | F | V | L | A | V | W | K | -907.087 |
| '0101030102010301070102 | V | D | M | R | F | V | V | V | T | W | E | -907.085 |
| '0201010104040103010112 | I | D | I | R | M | M | L | I | V | W | V | -907.084 |
| '0101030105030301010112 | V | D | M | R | V | L | V | V | V | W | V | -907.084 |
| '0201010102010203010104 | I | D | I | R | F | V | A | I | V | W | I | -907.083 |
| '0101030105020304010101 | V | D | M | R | V | I | V | L | V | W | H | -907.082 |
| '0101010303020301070101 | V | D | I | K | I | I | V | V | T | W | H | -907.082 |
| '0101010102030204010105 | V | D | I | R | F | L | A | L | V | W | K | -907.082 |
| '0201040104030101010112 | I | D | V | R | M | L | L | V | V | W | V | -907.08  |
| '0101020105040101050112 | V | D | L | R | V | M | L | V | M | W | V | -907.08  |
| '0101030201040101070102 | V | D | M | H | L | M | L | V | T | W | E | -907.078 |
| '0101010101030101040110 | V | D | I | R | L | L | L | V | L | W | R | -907.077 |
| '0201010105040201010108 | I | D | I | R | V | M | A | V | V | W | N | -907.077 |
| '0201010403010103010104 | I | D | I | Q | I | V | L | I | V | W | I | -907.076 |
| '0101040103030201010103 | V | D | V | R | I | L | A | V | V | W | F | -907.076 |
| '0101010302010404010101 | V | D | I | K | F | V | W | L | V | W | H | -907.071 |
| '0101040105030301010108 | V | D | V | R | V | L | V | V | V | W | N | -907.07  |
| '0101010405040101010101 | V | D | I | Q | V | M | L | V | V | W | H | -907.07  |
| '0101010101010103030112 | V | D | I | R | L | V | L | I | I | W | V | -907.069 |
| '0101010404010103010108 | V | D | I | Q | M | V | L | I | V | W | N | -907.069 |

|                         |   |   |   |   |   |   |   |   |   |   |   |          |
|-------------------------|---|---|---|---|---|---|---|---|---|---|---|----------|
| '0101010102040203070101 | V | D | I | R | F | M | A | I | T | W | H | -907.069 |
| '0201030105010105010109 | I | D | M | R | V | V | L | M | V | W | Q | -907.066 |
| '0201010102020105010105 | I | D | I | R | F | I | L | M | V | W | K | -907.063 |
| '0101010204010404010101 | V | D | I | H | M | V | W | L | V | W | H | -907.06  |
| '0101010101020101030104 | V | D | I | R | L | I | L | V | I | W | I | -907.06  |
| '0101020201010101040105 | V | D | L | H | L | V | L | V | L | W | K | -907.059 |
| '0201030102030301010101 | I | D | M | R | F | L | V | V | V | W | H | -907.058 |
| '0201040102010405010101 | I | D | V | R | F | V | W | M | V | W | H | -907.055 |
| '0201010405010103010110 | I | D | I | Q | V | V | L | I | V | W | R | -907.054 |
| '0201010302030301010101 | I | D | I | K | F | L | V | V | V | W | H | -907.054 |
| '0201010104030103070101 | I | D | I | R | M | L | L | I | T | W | H | -907.054 |
| '0201010102010303070101 | I | D | I | R | F | V | V | I | T | W | H | -907.054 |
| '0101020102010102010104 | V | D | L | R | F | V | L | A | V | W | I | -907.053 |
| '0101040301020101040109 | V | D | V | K | L | I | L | V | L | W | Q | -907.051 |
| '0101010101030101020108 | V | D | I | R | L | L | L | V | A | W | N | -907.05  |
| '0101040405010401010104 | V | D | V | Q | V | V | W | V | V | W | I | -907.05  |
| '0301030105020101060101 | L | D | M | R | V | I | L | V | S | W | H | -907.049 |
| '0101040103040101030107 | V | D | V | R | I | M | L | V | I | W | M | -907.049 |
| '0101040205010101050101 | V | D | V | H | V | V | L | V | M | W | H | -907.049 |
| '0101010102010203070104 | V | D | I | R | F | V | A | I | T | W | I | -907.047 |
| '0301010102010104010105 | L | D | I | R | F | V | L | L | V | W | K | -907.047 |
| '0101040205010102010111 | V | D | V | H | V | V | L | A | V | W | T | -907.046 |
| '0301040103020401010101 | L | D | V | R | I | I | W | V | V | W | H | -907.044 |
| '0101010302040103010101 | V | D | I | K | F | M | L | I | V | W | H | -907.043 |
| '0101010105040103010101 | V | D | I | R | V | M | L | I | V | W | H | -907.039 |
| '0101010105030401070110 | V | D | I | R | V | L | W | V | T | W | R | -907.035 |
| '0101010102010204020105 | V | D | I | R | F | V | A | L | A | W | K | -907.034 |
| '0101010103030401070111 | V | D | I | R | I | L | W | V | T | W | T | -907.034 |
| '0101010104030201040112 | V | D | I | R | M | L | A | V | L | W | V | -907.033 |
| '0101020202010105010102 | V | D | L | H | F | V | L | M | V | W | E | -907.033 |
| '0101040105010301040102 | V | D | V | R | V | V | V | V | L | W | E | -907.031 |
| '0101010101040101030106 | V | D | I | R | L | M | L | V | I | W | L | -907.028 |
| '0101010205010401010106 | V | D | I | H | V | V | W | V | V | W | L | -907.027 |
| '0101020101010103010102 | V | D | L | R | L | V | L | I | V | W | E | -907.027 |
| '0101010203040101010102 | V | D | I | H | I | M | L | V | V | W | E | -907.026 |
| '0101030105010102040108 | V | D | M | R | V | V | L | A | L | W | N | -907.025 |
| '0101010103040301060106 | V | D | I | R | I | M | V | V | S | W | L | -907.023 |

|                         |   |   |   |   |   |   |   |   |   |   |   |          |
|-------------------------|---|---|---|---|---|---|---|---|---|---|---|----------|
| '0101040103030101060106 | V | D | V | R | I | L | L | V | S | W | L | -907.022 |
| '0101040203010102010104 | V | D | V | H | I | V | L | A | V | W | I | -907.021 |
| '0101010203010403020101 | V | D | I | H | I | V | W | I | A | W | H | -907.02  |
| '0101020304010101070105 | V | D | L | K | M | V | L | V | T | W | K | -907.02  |
| '0101030304040101010106 | V | D | M | K | M | M | L | V | V | W | L | -907.018 |
| '0201010102040201020101 | I | D | I | R | F | M | A | V | A | W | H | -907.015 |
| '0101010203010102020101 | V | D | I | H | I | V | L | A | A | W | H | -907.012 |
| '0101020101020101030101 | V | D | L | R | L | I | L | V | I | W | H | -907.01  |
| '0101010102020105010112 | V | D | I | R | F | I | L | M | V | W | V | -907.008 |
| '0101030102010304020101 | V | D | M | R | F | V | V | L | A | W | H | -907.007 |
| '0101010103040201070108 | V | D | I | R | I | M | A | V | T | W | N | -907.006 |
| '0301010302020103010101 | L | D | I | K | F | I | L | I | V | W | H | -907.005 |
| '0101030302030101030101 | V | D | M | K | F | L | L | V | I | W | H | -907.005 |
| '0101040401020101020104 | V | D | V | Q | L | I | L | V | A | W | I | -907.003 |
| '0101010202010105050106 | V | D | I | H | F | V | L | M | M | W | L | -907.002 |
| '0201010105030104010108 | I | D | I | R | V | L | L | L | V | W | N | -907.002 |
| '0101010201040101030109 | V | D | I | H | L | M | L | V | I | W | Q | -907.001 |
| '0101010201010104070105 | V | D | I | H | L | V | L | L | T | W | K | -907.001 |
| '0101030203010401010106 | V | D | M | H | I | V | W | V | V | W | L | -907.001 |
| '0101030202010102010110 | V | D | M | H | F | V | L | A | V | W | R | -907.0   |
| '0101010105010105050112 | V | D | I | R | V | V | L | M | M | W | V | -906.998 |
| '0201010405010101020112 | I | D | I | Q | V | V | L | V | A | W | V | -906.997 |
| '0201010204010105010109 | I | D | I | H | M | V | L | M | V | W | Q | -906.996 |
| '0101010302020104040101 | V | D | I | K | F | I | L | L | L | W | H | -906.995 |
| '0101010105030102040104 | V | D | I | R | V | L | L | A | L | W | I | -906.994 |
| '0101010204030104010101 | V | D | I | H | M | L | L | L | V | W | H | -906.994 |
| '0101010402010104030108 | V | D | I | Q | F | V | L | L | I | W | N | -906.994 |
| '0201030103010101070107 | I | D | M | R | I | V | L | V | T | W | M | -906.989 |
| '0201030105010103060101 | I | D | M | R | V | V | L | I | S | W | H | -906.988 |
| '0201030101030103010110 | I | D | M | R | L | L | L | I | V | W | R | -906.988 |
| '0101010102040201010111 | V | D | I | R | F | M | A | V | V | W | T | -906.987 |
| '0201010105010102040103 | I | D | I | R | V | V | L | A | L | W | F | -906.987 |
| '0101010204030103010104 | V | D | I | H | M | L | L | I | V | W | I | -906.987 |
| '0301010202010101040108 | L | D | I | H | F | V | L | V | L | W | N | -906.986 |
| '0101040403010101030109 | V | D | V | Q | I | V | L | V | I | W | Q | -906.986 |
| '0201010105010105060105 | I | D | I | R | V | V | L | M | S | W | K | -906.985 |
| '0201030405010102010101 | I | D | M | Q | V | V | L | A | V | W | H | -906.985 |



|                         |   |   |   |   |   |   |   |   |   |   |   |          |
|-------------------------|---|---|---|---|---|---|---|---|---|---|---|----------|
| '0101010103010104020109 | V | D | I | R | I | V | L | L | A | W | Q | -906.984 |
| '0201030104040101010105 | I | D | M | R | M | M | L | V | V | W | K | -906.981 |
| '0101030302010101060112 | V | D | M | K | F | V | L | V | S | W | V | -906.981 |
| '0301010105010101030103 | L | D | I | R | V | V | L | V | I | W | F | -906.981 |
| '0301040405010101070101 | L | D | V | Q | V | V | L | V | T | W | H | -906.979 |
| '0101010103010404010106 | V | D | I | R | I | V | W | L | V | W | L | -906.975 |
| '0101010105010301030104 | V | D | I | R | V | V | V | V | I | W | I | -906.975 |
| '0201010101030102030110 | I | D | I | R | L | L | L | A | I | W | R | -906.975 |
| '0101010302010104030110 | V | D | I | K | F | V | L | L | I | W | R | -906.974 |
| '0101040201030101010111 | V | D | V | H | L | L | L | V | V | W | T | -906.969 |
| '0201010104040101040110 | I | D | I | R | M | M | L | V | L | W | R | -906.968 |
| '0101010305010104030106 | V | D | I | K | V | V | L | L | I | W | L | -906.964 |
| '0101010401020103030104 | V | D | I | Q | L | I | L | I | I | W | I | -906.963 |
| '0201040105010301010106 | I | D | V | R | V | V | V | V | V | W | L | -906.963 |
| '0301010102010304010101 | L | D | I | R | F | V | V | L | V | W | H | -906.961 |
| '0201010104010103010104 | I | D | I | R | M | V | L | I | V | W | I | -906.961 |
| '0201010404040101010108 | I | D | I | Q | M | M | L | V | V | W | N | -906.954 |
| '0301010403010102010109 | L | D | I | Q | I | V | L | A | V | W | Q | -906.954 |
| '0301010105010103010105 | L | D | I | R | V | V | L | I | V | W | K | -906.95  |
| '0201040402010101040101 | I | D | V | Q | F | V | L | V | L | W | H | -906.95  |
| '0201010105020301050101 | I | D | I | R | V | I | V | V | M | W | H | -906.948 |
| '0101010101020401040106 | V | D | I | R | L | I | W | V | L | W | L | -906.947 |
| '0101020203040101030101 | V | D | L | H | I | M | L | V | I | W | H | -906.947 |
| '0301010201020101010103 | L | D | I | H | L | I | L | V | V | W | F | -906.945 |
| '0101010404010403010105 | V | D | I | Q | M | V | W | I | V | W | K | -906.944 |
| '0101010202040301050101 | V | D | I | H | F | M | V | V | M | W | H | -906.942 |
| '0201020105010102010112 | I | D | L | R | V | V | L | A | V | W | V | -906.942 |
| '0101020402030101050101 | V | D | L | Q | F | L | L | V | M | W | H | -906.94  |
| '0201010102010102010105 | I | D | I | R | F | V | L | A | V | W | K | -906.94  |
| '0101010304010105070101 | V | D | I | K | M | V | L | M | T | W | H | -906.938 |
| '0101040101020101020108 | V | D | V | R | L | I | L | V | A | W | N | -906.937 |
| '0101040104010101010105 | V | D | V | R | M | V | L | V | V | W | K | -906.935 |
| '0101010302030401070101 | V | D | I | K | F | L | W | V | T | W | H | -906.934 |
| '0101040101020104040112 | V | D | V | R | L | I | L | L | L | W | V | -906.934 |
| '0101010402010303010105 | V | D | I | Q | F | V | V | I | V | W | K | -906.934 |
| '0101010304010105040112 | V | D | I | K | M | V | L | M | L | W | V | -906.931 |
| '0201010102010205010101 | I | D | I | R | F | V | A | M | V | W | H | -906.931 |

|                         |   |   |   |   |   |   |   |   |   |   |   |          |
|-------------------------|---|---|---|---|---|---|---|---|---|---|---|----------|
| '0101040304010103010101 | V | D | V | K | M | V | L | I | V | W | H | -906.93  |
| '0101010304010404010104 | V | D | I | K | M | V | W | L | V | W | I | -906.928 |
| '0101040303010104010104 | V | D | V | K | I | V | L | L | V | W | I | -906.926 |
| '0101030103010403020101 | V | D | M | R | I | V | W | I | A | W | H | -906.925 |
| '0101040302010101010111 | V | D | V | K | F | V | L | V | V | W | T | -906.923 |
| '0101010102040103060102 | V | D | I | R | F | M | L | I | S | W | E | -906.923 |
| '0101010405020403010101 | V | D | I | Q | V | I | W | I | V | W | H | -906.922 |
| '0101010103030201070106 | V | D | I | R | I | L | A | V | T | W | L | -906.921 |
| '0101010101030403010104 | V | D | I | R | L | L | W | I | V | W | I | -906.918 |
| '0101040104020102010104 | V | D | V | R | M | I | L | A | V | W | I | -906.917 |
| '0101010103030401050112 | V | D | I | R | I | L | W | V | M | W | V | -906.916 |
| '0201010104010203010105 | I | D | I | R | M | V | A | I | V | W | K | -906.916 |
| '0301040103030101010112 | L | D | V | R | I | L | L | V | V | W | V | -906.916 |
| '0101010304030101010110 | V | D | I | K | M | L | L | V | V | W | R | -906.915 |
| '0101010204010301040104 | V | D | I | H | M | V | V | V | L | W | I | -906.913 |
| '0101040101020203010106 | V | D | V | R | L | I | A | I | V | W | L | -906.912 |
| '0101010304010101070106 | V | D | I | K | M | V | L | V | T | W | L | -906.909 |
| '0201030302040101010101 | I | D | M | K | F | M | L | V | V | W | H | -906.908 |
| '0101030103030201070101 | V | D | M | R | I | L | A | V | T | W | H | -906.908 |
| '0101010405010104070106 | V | D | I | Q | V | V | L | L | T | W | L | -906.907 |
| '0101030302010201070101 | V | D | M | K | F | V | A | V | T | W | H | -906.907 |
| '0101010202020103010102 | V | D | I | H | F | I | L | I | V | W | E | -906.907 |
| '0201010103010203010108 | I | D | I | R | I | V | A | I | V | W | N | -906.906 |
| '0101010203010102030104 | V | D | I | H | I | V | L | A | I | W | I | -906.906 |
| '0101010202040101020110 | V | D | I | H | F | M | L | V | A | W | R | -906.904 |
| '0201010203020101010107 | I | D | I | H | I | I | L | V | V | W | M | -906.902 |
| '0101010102020304060101 | V | D | I | R | F | I | V | L | S | W | H | -906.902 |
| '0101030204010104040101 | V | D | M | H | M | V | L | L | L | W | H | -906.902 |
| '0301010105020102010107 | L | D | I | R | V | I | L | A | V | W | M | -906.9   |
| '0301030105010105010101 | L | D | M | R | V | V | L | M | V | W | H | -906.9   |
| '0201040405010101050101 | I | D | V | Q | V | V | L | V | M | W | H | -906.9   |
| '0301010105010105040101 | L | D | I | R | V | V | L | M | L | W | H | -906.898 |
| '0101010102010401020102 | V | D | I | R | F | V | W | V | A | W | E | -906.897 |
| '0101020304010101020108 | V | D | L | K | M | V | L | V | A | W | N | -906.895 |
| '0201010105010405010105 | I | D | I | R | V | V | W | M | V | W | K | -906.893 |
| '0101010105010304050106 | V | D | I | R | V | V | V | L | M | W | L | -906.892 |
| '0101030105040101030108 | V | D | M | R | V | M | L | V | I | W | N | -906.89  |

|                         |   |   |   |   |   |   |   |   |   |   |   |          |
|-------------------------|---|---|---|---|---|---|---|---|---|---|---|----------|
| '0301040101020104010104 | L | D | V | R | L | I | L | L | V | W | I | -906.888 |
| '0201030302010101010108 | I | D | M | K | F | V | L | V | V | W | N | -906.887 |
| '0301040103020103010101 | L | D | V | R | I | I | L | I | V | W | H | -906.886 |
| '0101030103010101020112 | V | D | M | R | I | V | L | V | A | W | V | -906.881 |
| '0301010205010105020101 | L | D | I | H | V | V | L | M | A | W | H | -906.881 |
| '0101030203010301050101 | V | D | M | H | I | V | V | V | M | W | H | -906.881 |
| '0101040102010401020108 | V | D | V | R | F | V | W | V | A | W | N | -906.88  |
| '0101020304010104010101 | V | D | L | K | M | V | L | L | V | W | H | -906.879 |
| '0101040101010104040107 | V | D | V | R | L | V | L | L | L | W | M | -906.879 |
| '0101040105010201050105 | V | D | V | R | V | V | A | V | M | W | K | -906.875 |
| '0301010203040101010112 | L | D | I | H | I | M | L | V | V | W | V | -906.875 |
| '0301010102040101060108 | L | D | I | R | F | M | L | V | S | W | N | -906.875 |
| '0101010103030101050109 | V | D | I | R | I | L | L | V | M | W | Q | -906.873 |
| '0101010102020104050107 | V | D | I | R | F | I | L | L | M | W | M | -906.869 |
| '0101010104040201010103 | V | D | I | R | M | M | A | V | V | W | F | -906.867 |
| '0101040205010101060110 | V | D | V | H | V | V | L | V | S | W | R | -906.867 |
| '0201040201030103010101 | I | D | V | H | L | L | L | I | V | W | H | -906.866 |
| '0101030301020101050105 | V | D | M | K | L | I | L | V | M | W | K | -906.866 |
| '0101010203040101050107 | V | D | I | H | I | M | L | V | M | W | M | -906.865 |
| '0301010305020101050101 | L | D | I | K | V | I | L | V | M | W | H | -906.865 |
| '0101010203010301010105 | V | D | I | H | I | V | V | V | V | W | K | -906.865 |
| '0301030105020201010101 | L | D | M | R | V | I | A | V | V | W | H | -906.864 |
| '0101020202010201010112 | V | D | L | H | F | V | A | V | V | W | V | -906.864 |
| '0101040103010301050104 | V | D | V | R | I | V | V | V | M | W | I | -906.863 |
| '0301010105040101060102 | L | D | I | R | V | M | L | V | S | W | E | -906.86  |
| '0101010102030103060110 | V | D | I | R | F | L | L | I | S | W | R | -906.858 |
| '0101030101040101040107 | V | D | M | R | L | M | L | V | L | W | M | -906.857 |
| '0301040102010101030112 | L | D | V | R | F | V | L | V | I | W | V | -906.857 |
| '0101010105020401030104 | V | D | I | R | V | I | W | V | I | W | I | -906.856 |
| '0101030102010105030109 | V | D | M | R | F | V | L | M | I | W | Q | -906.856 |
| '0101010403040101070109 | V | D | I | Q | I | M | L | V | T | W | Q | -906.855 |
| '0201010103040102010108 | I | D | I | R | I | M | L | A | V | W | N | -906.855 |
| '0101010202010301010111 | V | D | I | H | F | V | V | V | V | W | T | -906.854 |
| '0101010103030203010112 | V | D | I | R | I | L | A | I | V | W | V | -906.847 |
| '0101030102010204040101 | V | D | M | R | F | V | A | L | L | W | H | -906.846 |
| '0101030401020101010109 | V | D | M | Q | L | I | L | V | V | W | Q | -906.845 |
| '0101010102040102010101 | V | D | I | R | F | M | L | A | V | W | H | -906.845 |

|                         |   |   |   |   |   |   |   |   |   |   |   |          |
|-------------------------|---|---|---|---|---|---|---|---|---|---|---|----------|
| '0101010102010405010101 | V | D | I | R | F | V | W | M | V | W | H | -906.845 |
| '0101030105040201010103 | V | D | M | R | V | M | A | V | V | W | F | -906.844 |
| '0301010102010101070112 | L | D | I | R | F | V | L | V | T | W | V | -906.842 |
| '0301010105010105070106 | L | D | I | R | V | V | L | M | T | W | L | -906.842 |
| '0101030205030301010101 | V | D | M | H | V | L | V | V | V | W | H | -906.841 |
| '0101030103020102030101 | V | D | M | R | I | I | L | A | I | W | H | -906.84  |
| '0301010102020201070101 | L | D | I | R | F | I | A | V | T | W | H | -906.839 |
| '0101020105010201020106 | V | D | L | R | V | V | A | V | A | W | L | -906.838 |
| '0101040102010402010106 | V | D | V | R | F | V | W | A | V | W | L | -906.837 |
| '0101020102030301010106 | V | D | L | R | F | L | V | V | V | W | L | -906.837 |
| '0301010105010201020105 | L | D | I | R | V | V | A | V | A | W | K | -906.837 |
| '0101030403010101070105 | V | D | M | Q | I | V | L | V | T | W | K | -906.836 |
| '0101020102010102040105 | V | D | L | R | F | V | L | A | L | W | K | -906.836 |
| '0101010203010101060106 | V | D | I | H | I | V | L | V | S | W | L | -906.836 |
| '0101010201020403010105 | V | D | I | H | L | I | W | I | V | W | K | -906.835 |
| '0201040102010101030101 | I | D | V | R | F | V | L | V | I | W | H | -906.835 |
| '0201020102010103070101 | I | D | L | R | F | V | L | I | T | W | H | -906.833 |
| '0101010103020103060104 | V | D | I | R | I | I | L | I | S | W | I | -906.832 |
| '0101010302010204010105 | V | D | I | K | F | V | A | L | V | W | K | -906.831 |
| '0301030202010103010101 | L | D | M | H | F | V | L | I | V | W | H | -906.831 |
| '0101030402030103010101 | V | D | M | Q | F | L | L | I | V | W | H | -906.83  |
| '0301010204010101040104 | L | D | I | H | M | V | L | V | L | W | I | -906.83  |
| '0101010303020101060104 | V | D | I | K | I | I | L | V | S | W | I | -906.829 |
| '0101030403020101010110 | V | D | M | Q | I | I | L | V | V | W | R | -906.829 |
| '0101010103020304010101 | V | D | I | R | I | I | V | L | V | W | H | -906.828 |
| '0101040105010401020102 | V | D | V | R | V | V | W | V | A | W | E | -906.828 |
| '0101010405030401010110 | V | D | I | Q | V | L | W | V | V | W | R | -906.827 |
| '0101040104020101010112 | V | D | V | R | M | I | L | V | V | W | V | -906.827 |
| '0201030305010101010109 | I | D | M | K | V | V | L | V | V | W | Q | -906.826 |
| '0101010103030103040104 | V | D | I | R | I | L | L | I | L | W | I | -906.826 |
| '0101020404010104010104 | V | D | L | Q | M | V | L | L | V | W | I | -906.825 |
| '0301040105010101020110 | L | D | V | R | V | V | L | V | A | W | R | -906.825 |
| '0101010103010104070106 | V | D | I | R | I | V | L | L | T | W | L | -906.824 |
| '0101040101020104070109 | V | D | V | R | L | I | L | L | T | W | Q | -906.822 |
| '0101010302040201010108 | V | D | I | K | F | M | A | V | V | W | N | -906.821 |
| '0101020103010104020106 | V | D | L | R | I | V | L | L | A | W | L | -906.821 |
| '0101010103030402010112 | V | D | I | R | I | L | W | A | V | W | V | -906.819 |

|                         |   |   |   |   |   |   |   |   |   |   |   |          |
|-------------------------|---|---|---|---|---|---|---|---|---|---|---|----------|
| '0101040102030104010111 | V | D | V | R | F | L | L | L | V | W | T | -906.817 |
| '0101010404040101040104 | V | D | I | Q | M | M | L | V | L | W | I | -906.817 |
| '0101040101030301050106 | V | D | V | R | L | L | V | V | M | W | L | -906.815 |
| '0101010205030101050102 | V | D | I | H | V | L | L | V | M | W | E | -906.815 |
| '0101020102010204010102 | V | D | L | R | F | V | A | L | V | W | E | -906.813 |
| '0101010105010304030109 | V | D | I | R | V | V | V | L | I | W | Q | -906.812 |
| '0101010403030103050101 | V | D | I | Q | I | L | L | I | M | W | H | -906.81  |
| '0201010205010101060108 | I | D | I | H | V | V | L | V | S | W | N | -906.809 |
| '0101010302010101010109 | V | D | I | K | F | V | L | V | V | W | Q | -906.808 |
| '0101010105040104040106 | V | D | I | R | V | M | L | L | L | W | L | -906.804 |
| '0101010204030105010105 | V | D | I | H | M | L | L | M | V | W | K | -906.803 |
| '0201010302040201010101 | I | D | I | K | F | M | A | V | V | W | H | -906.803 |
| '0101010105020304010103 | V | D | I | R | V | I | V | L | V | W | F | -906.8   |
| '0101020103010101070108 | V | D | L | R | I | V | L | V | T | W | N | -906.8   |
| '0301030105010201010106 | L | D | M | R | V | V | A | V | V | W | L | -906.8   |
| '0201040405010104010101 | I | D | V | Q | V | V | L | L | V | W | H | -906.799 |
| '0101010103030201050102 | V | D | I | R | I | L | A | V | M | W | E | -906.799 |
| '0101020205010101050105 | V | D | L | H | V | V | L | V | M | W | K | -906.799 |
| '0101040104010101030109 | V | D | V | R | M | V | L | V | I | W | Q | -906.798 |
| '0101010404010103020101 | V | D | I | Q | M | V | L | I | A | W | H | -906.793 |
| '0101040102020201020101 | V | D | V | R | F | I | A | V | A | W | H | -906.789 |
| '0101020101020101050108 | V | D | L | R | L | I | L | V | M | W | N | -906.788 |
| '0101040201010304010104 | V | D | V | H | L | V | V | L | V | W | I | -906.787 |
| '0101010102010102030104 | V | D | I | R | F | V | L | A | I | W | I | -906.787 |
| '0101040105040201020101 | V | D | V | R | V | M | A | V | A | W | H | -906.785 |
| '0101010304010101010102 | V | D | I | K | M | V | L | V | V | W | E | -906.783 |
| '0101030102010301010109 | V | D | M | R | F | V | V | V | V | W | Q | -906.783 |
| '0201030101010103010106 | I | D | M | R | L | V | L | I | V | W | L | -906.783 |
| '0201010305010101040107 | I | D | I | K | V | V | L | V | L | W | M | -906.782 |
| '0101040201010104020112 | V | D | V | H | L | V | L | L | A | W | V | -906.782 |
| '0101010202030105070101 | V | D | I | H | F | L | L | M | T | W | H | -906.781 |
| '0201010103030201030101 | I | D | I | R | I | L | A | V | I | W | H | -906.781 |
| '0101030201030301050101 | V | D | M | H | L | L | V | V | M | W | H | -906.78  |
| '0101010203010201040106 | V | D | I | H | I | V | A | V | L | W | L | -906.78  |
| '0101010302010102040101 | V | D | I | K | F | V | L | A | L | W | H | -906.78  |
| '0101010203010103060107 | V | D | I | H | I | V | L | I | S | W | M | -906.78  |
| '0101010201020401010101 | V | D | I | H | L | I | W | V | V | W | H | -906.778 |

|                         |   |   |   |   |   |   |   |   |   |   |   |          |
|-------------------------|---|---|---|---|---|---|---|---|---|---|---|----------|
| '0101030102010201030112 | V | D | M | R | F | V | A | V | I | W | V | -906.778 |
| '0101040202010201010102 | V | D | V | H | F | V | A | V | V | W | E | -906.776 |
| '0201010202010105060101 | I | D | I | H | F | V | L | M | S | W | H | -906.775 |
| '0101010303010104040101 | V | D | I | K | I | V | L | L | L | W | H | -906.773 |
| '0101030304010101070104 | V | D | M | K | M | V | L | V | T | W | I | -906.773 |
| '0201040203010101010103 | I | D | V | H | I | V | L | V | V | W | F | -906.77  |
| '0301040202010101040101 | L | D | V | H | F | V | L | V | L | W | H | -906.77  |
| '0101010105010303040108 | V | D | I | R | V | V | V | I | L | W | N | -906.769 |
| '0201010103040101050104 | I | D | I | R | I | M | L | V | M | W | I | -906.767 |
| '0301010202010101030106 | L | D | I | H | F | V | L | V | I | W | L | -906.766 |
| '0101030103030104010111 | V | D | M | R | I | L | L | L | V | W | T | -906.766 |
| '0101010201020103030110 | V | D | I | H | L | I | L | I | I | W | R | -906.766 |
| '0201020101030101040110 | I | D | L | R | L | L | L | V | L | W | R | -906.765 |
| '0101040203010401070101 | V | D | V | H | I | V | W | V | T | W | H | -906.765 |
| '0201010102040401010105 | I | D | I | R | F | M | W | V | V | W | K | -906.765 |
| '0101010102040102050105 | V | D | I | R | F | M | L | A | M | W | K | -906.764 |
| '0101030201030301010105 | V | D | M | H | L | L | V | V | V | W | K | -906.763 |
| '0201010105030101030112 | I | D | I | R | V | L | L | V | I | W | V | -906.761 |
| '0101020405020101010108 | V | D | L | Q | V | I | L | V | V | W | N | -906.761 |
| '0101010102030105010101 | V | D | I | R | F | L | L | M | V | W | H | -906.76  |
| '0201030101020101050105 | I | D | M | R | L | I | L | V | M | W | K | -906.76  |
| '0101030105010301040109 | V | D | M | R | V | V | V | V | L | W | Q | -906.759 |
| '0101030305010101020103 | V | D | M | K | V | V | L | V | A | W | F | -906.759 |
| '0201040104010303010101 | I | D | V | R | M | V | V | I | V | W | H | -906.759 |
| '0101010203010201050104 | V | D | I | H | I | V | A | V | M | W | I | -906.759 |
| '0101040303010103010108 | V | D | V | K | I | V | L | I | V | W | N | -906.759 |
| '0301010105030103020101 | L | D | I | R | V | L | L | I | A | W | H | -906.757 |
| '0101010201030203040101 | V | D | I | H | L | L | A | I | L | W | H | -906.757 |
| '0201010405040101040101 | I | D | I | Q | V | M | L | V | L | W | H | -906.756 |
| '0101010102020102030101 | V | D | I | R | F | I | L | A | I | W | H | -906.755 |
| '0101020102010203040101 | V | D | L | R | F | V | A | I | L | W | H | -906.754 |
| '0301030103010102010109 | L | D | M | R | I | V | L | A | V | W | Q | -906.753 |
| '0101010103010203030103 | V | D | I | R | I | V | A | I | I | W | F | -906.753 |
| '0101010105030401060105 | V | D | I | R | V | L | W | V | S | W | K | -906.749 |
| '0101030102010102020109 | V | D | M | R | F | V | L | A | A | W | Q | -906.748 |
| '0301020102010101040106 | L | D | L | R | F | V | L | V | L | W | L | -906.746 |
| '0301010201040101040104 | L | D | I | H | L | M | L | V | L | W | I | -906.746 |

|                         |   |   |   |   |   |   |   |   |   |   |   |          |
|-------------------------|---|---|---|---|---|---|---|---|---|---|---|----------|
| '0101010401020101010106 | V | D | I | Q | L | I | L | V | V | W | L | -906.744 |
| '0201040103010104010111 | I | D | V | R | I | V | L | L | V | W | T | -906.743 |
| '0101030203010103010102 | V | D | M | H | I | V | L | I | V | W | E | -906.743 |
| '0101010303010103050110 | V | D | I | K | I | V | L | I | M | W | R | -906.742 |
| '0101010103010403020110 | V | D | I | R | I | V | W | I | A | W | R | -906.74  |
| '0301010103040101010107 | L | D | I | R | I | M | L | V | V | W | M | -906.74  |
| '0201010305010101010104 | I | D | I | K | V | V | L | V | V | W | I | -906.738 |
| '0201010103010104020101 | I | D | I | R | I | V | L | L | A | W | H | -906.738 |
| '0101010202040103060101 | V | D | I | H | F | M | L | I | S | W | H | -906.738 |
| '0101040405010301010106 | V | D | V | Q | V | V | V | V | V | W | L | -906.737 |
| '0101040203010304010101 | V | D | V | H | I | V | V | L | V | W | H | -906.736 |
| '0101030102040103010107 | V | D | M | R | F | M | L | I | V | W | M | -906.735 |
| '0101010302010101070112 | V | D | I | K | F | V | L | V | T | W | V | -906.734 |
| '0301010105020102060101 | L | D | I | R | V | I | L | A | S | W | H | -906.732 |
| '0201010104010101010110 | I | D | I | R | M | V | L | V | V | W | R | -906.731 |
| '0101030103010105020106 | V | D | M | R | I | V | L | M | A | W | L | -906.731 |
| '0201010405010201010112 | I | D | I | Q | V | V | A | V | V | W | V | -906.73  |
| '0101010101020101050106 | V | D | I | R | L | I | L | V | M | W | L | -906.73  |
| '0301010202040101060101 | L | D | I | H | F | M | L | V | S | W | H | -906.728 |
| '0101010203010401010108 | V | D | I | H | I | V | W | V | V | W | N | -906.728 |
| '0101020101020101020106 | V | D | L | R | L | I | L | V | A | W | L | -906.728 |
| '0101030101010101050110 | V | D | M | R | L | V | L | V | M | W | R | -906.727 |
| '0101010201030401020112 | V | D | I | H | L | L | W | V | A | W | V | -906.726 |
| '0101010205030105010101 | V | D | I | H | V | L | L | M | V | W | H | -906.725 |
| '0101020105010104010107 | V | D | L | R | V | V | L | L | V | W | M | -906.725 |
| '0101020102040101030104 | V | D | L | R | F | M | L | V | I | W | I | -906.725 |
| '0201040101020103020101 | I | D | V | R | L | I | L | I | A | W | H | -906.724 |
| '0101010102010102040103 | V | D | I | R | F | V | L | A | L | W | F | -906.723 |
| '0101010201020301040101 | V | D | I | H | L | I | V | V | L | W | H | -906.723 |
| '0101010201030301040104 | V | D | I | H | L | L | V | V | L | W | I | -906.723 |
| '0101030405020104010101 | V | D | M | Q | V | I | L | L | V | W | H | -906.722 |
| '0101020301030101020101 | V | D | L | K | L | L | L | V | A | W | H | -906.721 |
| '0201040204040101010101 | I | D | V | H | M | M | L | V | V | W | H | -906.721 |
| '0201040403010101010110 | I | D | V | Q | I | V | L | V | V | W | R | -906.721 |
| '0101020105020101070107 | V | D | L | R | V | I | L | V | T | W | M | -906.718 |
| '0101030103010303070101 | V | D | M | R | I | V | V | I | T | W | H | -906.718 |
| '0201040103010101020109 | I | D | V | R | I | V | L | V | A | W | Q | -906.715 |

|                         |   |   |   |   |   |   |   |   |   |   |   |          |
|-------------------------|---|---|---|---|---|---|---|---|---|---|---|----------|
| '0101040103010401040108 | V | D | V | R | I | V | W | V | L | W | N | -906.714 |
| '0101010102010304030110 | V | D | I | R | F | V | V | L | I | W | R | -906.714 |
| '0101040204030101010101 | V | D | V | H | M | L | L | V | V | W | H | -906.713 |
| '0301010105030101010112 | L | D | I | R | V | L | L | V | V | W | V | -906.712 |
| '0101010304010104050112 | V | D | I | K | M | V | L | L | M | W | V | -906.712 |
| '0101030103010103060102 | V | D | M | R | I | V | L | I | S | W | E | -906.709 |
| '0101010405010404010112 | V | D | I | Q | V | V | W | L | V | W | V | -906.707 |
| '0201010103040101020106 | I | D | I | R | I | M | L | V | A | W | L | -906.704 |
| '0101010103040102040101 | V | D | I | R | I | M | L | A | L | W | H | -906.703 |
| '0201010405020104010101 | I | D | I | Q | V | I | L | L | V | W | H | -906.703 |
| '0201010101030303010104 | I | D | I | R | L | L | V | I | V | W | I | -906.699 |
| '0301010102010402010101 | L | D | I | R | F | V | W | A | V | W | H | -906.698 |
| '0301040205010101010103 | L | D | V | H | V | V | L | V | V | W | F | -906.698 |
| '0101040104020401010109 | V | D | V | R | M | I | W | V | V | W | Q | -906.698 |
| '0101010203010301040112 | V | D | I | H | I | V | V | V | L | W | V | -906.696 |
| '0101030102030401070101 | V | D | M | R | F | L | W | V | T | W | H | -906.696 |
| '0201010105030301010110 | I | D | I | R | V | L | V | V | V | W | R | -906.692 |
| '0101010103020401030110 | V | D | I | R | I | I | W | V | I | W | R | -906.691 |
| '0201010101030103060108 | I | D | I | R | L | L | L | I | S | W | N | -906.69  |
| '0101010105020105030109 | V | D | I | R | V | I | L | M | I | W | Q | -906.69  |
| '0301010102010101010103 | L | D | I | R | F | V | L | V | V | W | F | -906.689 |
| '0101010304010104030104 | V | D | I | K | M | V | L | L | I | W | I | -906.689 |
| '0101010203010103070106 | V | D | I | H | I | V | L | I | T | W | L | -906.688 |
| '0201040105040201010101 | I | D | V | R | V | M | A | V | V | W | H | -906.688 |
| '0101010101030201010109 | V | D | I | R | L | L | A | V | V | W | Q | -906.687 |
| '0101040104010103050104 | V | D | V | R | M | V | L | I | M | W | I | -906.687 |
| '0101040105010301050106 | V | D | V | R | V | V | V | V | M | W | L | -906.686 |
| '0101040302010401010109 | V | D | V | K | F | V | W | V | V | W | Q | -906.685 |
| '0201030103010102010104 | I | D | M | R | I | V | L | A | V | W | I | -906.685 |
| '0101040103010102040106 | V | D | V | R | I | V | L | A | L | W | L | -906.684 |
| '0101040305010101040103 | V | D | V | K | V | V | L | V | L | W | F | -906.684 |
| '0201010103020102020101 | I | D | I | R | I | I | L | A | A | W | H | -906.684 |
| '0101010105030403010102 | V | D | I | R | V | L | W | I | V | W | E | -906.683 |
| '0201010302040101070101 | I | D | I | K | F | M | L | V | T | W | H | -906.682 |
| '0101010402030204010101 | V | D | I | Q | F | L | A | L | V | W | H | -906.679 |
| '0301010205010201010110 | L | D | I | H | V | V | A | V | V | W | R | -906.676 |
| '0101010101030401010108 | V | D | I | R | L | L | W | V | V | W | N | -906.676 |



|                         |   |   |   |   |   |   |   |   |   |   |   |          |
|-------------------------|---|---|---|---|---|---|---|---|---|---|---|----------|
| '0201010102010201020112 | I | D | I | R | F | V | A | V | A | W | V | -906.676 |
| '0101010201010101040106 | V | D | I | H | L | V | L | V | L | W | L | -906.675 |
| '0201040105010101010102 | I | D | V | R | V | V | L | V | V | W | E | -906.674 |
| '0101040401020101070103 | V | D | V | Q | L | I | L | V | T | W | F | -906.674 |
| '0101030301020101070106 | V | D | M | K | L | I | L | V | T | W | L | -906.672 |
| '0201040101010103040110 | I | D | V | R | L | V | L | I | L | W | R | -906.67  |
| '0301010105010102030102 | L | D | I | R | V | V | L | A | I | W | E | -906.67  |
| '0101020305030101010105 | V | D | L | K | V | L | L | V | V | W | K | -906.667 |
| '0101010201020101060109 | V | D | I | H | L | I | L | V | S | W | Q | -906.665 |
| '0201030105010101050108 | I | D | M | R | V | V | L | V | M | W | N | -906.665 |
| '0101010302040301040101 | V | D | I | K | F | M | V | V | L | W | H | -906.665 |
| '0101010105010205070104 | V | D | I | R | V | V | A | M | T | W | I | -906.664 |
| '0201010104030203010101 | I | D | I | R | M | L | A | I | V | W | H | -906.664 |
| '0201010102020301010108 | I | D | I | R | F | I | V | V | V | W | N | -906.661 |
| '0101020302040101030101 | V | D | L | K | F | M | L | V | I | W | H | -906.66  |
| '0101040105020201040101 | V | D | V | R | V | I | A | V | L | W | H | -906.658 |
| '0101010104010101070105 | V | D | I | R | M | V | L | V | T | W | K | -906.657 |
| '0101020202010101050106 | V | D | L | H | F | V | L | V | M | W | L | -906.655 |
| '0301010103020301070101 | L | D | I | R | I | I | V | V | T | W | H | -906.655 |
| '0101030205020401010101 | V | D | M | H | V | I | W | V | V | W | H | -906.651 |
| '0301010204010101070110 | L | D | I | H | M | V | L | V | T | W | R | -906.649 |
| '0101010104010104020104 | V | D | I | R | M | V | L | L | A | W | I | -906.648 |
| '0101010404040101030105 | V | D | I | Q | M | M | L | V | I | W | K | -906.645 |
| '0101010205010104070102 | V | D | I | H | V | V | L | L | T | W | E | -906.644 |
| '0101040305020102010101 | V | D | V | K | V | I | L | A | V | W | H | -906.642 |
| '0201010203010103020101 | I | D | I | H | I | V | L | I | A | W | H | -906.64  |
| '0101020202010404010101 | V | D | L | H | F | V | W | L | V | W | H | -906.637 |
| '0101010304010101030107 | V | D | I | K | M | V | L | V | I | W | M | -906.637 |
| '0101010302020101030109 | V | D | I | K | F | I | L | V | I | W | Q | -906.636 |
| '0101010101020104040110 | V | D | I | R | L | I | L | L | L | W | R | -906.635 |
| '0101010104040101070107 | V | D | I | R | M | M | L | V | T | W | M | -906.634 |
| '0301010201020101030106 | L | D | I | H | L | I | L | V | I | W | L | -906.633 |
| '0101040102010201050103 | V | D | V | R | F | V | A | V | M | W | F | -906.633 |
| '0101020101020103010101 | V | D | L | R | L | I | L | I | V | W | H | -906.628 |
| '0101010202010105060110 | V | D | I | H | F | V | L | M | S | W | R | -906.628 |
| '0101010103030105010106 | V | D | I | R | I | L | L | M | V | W | L | -906.626 |
| '0301040402010104010101 | L | D | V | Q | F | V | L | L | V | W | H | -906.626 |

|                         |   |   |   |   |   |   |   |   |   |   |   |          |
|-------------------------|---|---|---|---|---|---|---|---|---|---|---|----------|
| '0201040101020101070101 | I | D | V | R | L | I | L | V | T | W | H | -906.625 |
| '0201010103030104010112 | I | D | I | R | I | L | L | L | V | W | V | -906.625 |
| '0101030201030101060105 | V | D | M | H | L | L | L | V | S | W | K | -906.625 |
| '0101040301010103040111 | V | D | V | K | L | V | L | I | L | W | T | -906.622 |
| '0101030305010101030107 | V | D | M | K | V | V | L | V | I | W | M | -906.618 |
| '0101040103020101060107 | V | D | V | R | I | I | L | V | S | W | M | -906.618 |
